# Supplementary material for: Exclusive use and evaluation of inheritance metrics viability in software fault prediction—an experimental study
Source: PeerJ Comput Sci. 2021 Jun 4;7:e563. doi: 10.7717/peerj-cs.563 (PMC8189025; doi:10.7717/peerj-cs.563)
Supplement: Supplemental Information 7 [file peerj-cs-07-563-s007.xlsx]

## Sheet: svm-comp
dataset	featuresset	n	AUC	Errors	TPs	FNs	TNs	FPs	Kernels	average	count	t-test				sorting order start	order TT
ant-1.7.csvmfa.csv	mfa	1	0.466667	0.0132565	15	0	34	0	-33.9867	0.00748334	5	0.596079				381	1
camel-1.2.csvmfa.csv	mfa	1	0	0.00876104	12	0	17	0	-16.9912							382	2
prop-1.csvmfa.csv	mfa	1	0.333333	0.00242254	33	0	105	0	-104.998							383	3
tomcat.csvmfa.csv	mfa	1	0	0.00671547	4	0	30	0	-29.9933							384	4
xalan-2.4.csvmfa.csv	mfa	1	0.154286	0.00626112	10	0	35	0	-34.9937							385	5
Eclipse JDT Core.csvnoai.csv	noai	1	0	0.00937104	11	0	16	0	-15.9906	0.00915982	2	0.22562				390	6
single-version-ck-oo.csvnoai.csv	noai	1	0	0.0089486	11	0	16	0	-15.9911							391	7
Eclipse JDT Core.csvnomi.csv	nomi	1	0	0.008749	7	0	23	0	-22.9913	0.00850767	3					441	8
Eclipse PDE UI.csvnomi.csv	nomi	1	0	0.00887959	3	0	24	0	-23.9911							442	9
single-version-ck-oo.csvnomi.csv	nomi	1	0	0.00789442	7	0	23	0	-22.9921							443	10
Eclipse JDT Core.csvdit,fanIn .csv	dit,fanIn	2	0	0.0087158	11	0	18	0	linear	0.00918689	4					1	11
Eclipse PDE UI.csvdit,fanIn .csv	dit,fanIn	2	0	0.00731683	4	0	24	0	-23.9927							2	12
Mylyn.csvdit,fanIn .csv	dit,fanIn	2	0	0.0121958	5	0	16	0	-15.9878							3	13
single-version-ck-oo.csvdit,fanIn .csv	dit,fanIn	2	0	0.00851909	11	0	18	0	-17.9915							4	14
Eclipse JDT Core.csvdit,fanOut .csv	dit,fanOut	2	0.236364	0.00660297	15	0	22	0	-21.9934	0.00784048	4					98	15
Eclipse PDE UI.csvdit,fanOut .csv	dit,fanOut	2	0	0.00725111	8	0	27	0	-26.9927							99	16
Mylyn.csvdit,fanOut .csv	dit,fanOut	2	0	0.0106661	7	0	16	0	-15.9893							100	17
single-version-ck-oo.csvdit,fanOut .csv	dit,fanOut	2	0	0.00684173	15	0	22	0	-21.9932							101	18
ant-1.7.csvdit,mfa.csv	dit,mfa	2	0	0.00428327	17	0	40	0	-39.9957	0.00511336	5					160	19
camel-1.2.csvdit,mfa.csv	dit,mfa	2	0.153846	0.00962118	13	0	22	0	-21.9904							161	20
prop-1.csvdit,mfa.csv	dit,mfa	2	0	0.00125003	49	0	158	0	-157.999							162	21
tomcat.csvdit,mfa.csv	dit,mfa	2	0	0.00567885	4	0	35	0	-34.9943							163	22
xalan-2.4.csvdit,mfa.csv	dit,mfa	2	0	0.00473347	11	0	40	0	-39.9953							164	23
churn.csvdit,noai.csv	dit,noai	2	0	0.0115947	8	0	12	0	-11.9884	0.00825749	5					172	24
Eclipse JDT Core.csvdit,noai.csv	dit,noai	2	0	0.00508698	15	0	31	0	-30.9949							169	25
Eclipse PDE UI.csvdit,noai.csv	dit,noai	2	0	0.0120015	4	0	19	0	-18.988							170	26
eclipse34_swt.csv.cvs.csvdit,noai.csv	dit,noai	2	0	0.00756076	29	0	0	6	0.00756076							173	27
single-version-ck-oo.csvdit,noai.csv	dit,noai	2	0	0.0050435	15	0	31	0	-30.995							171	28
eclipse34_swt.csv.cvs.csvdit,noc.csv	dit,noc	2	0	0.0115531	17	0	0	5	0.0115531	0.0109257	2					180	29
prop-1.csvdit,noc.csv	dit,noc	2	0	0.0102983	4	0	18	0	-17.9897							181	30
Eclipse JDT Core.csvdit,nomi.csv	dit,nomi	2	0	0.00503678	11	0	37	0	-36.995	0.00660643	6					230	31
Eclipse PDE UI.csvdit,nomi.csv	dit,nomi	2	0	0.00472669	5	0	40	0	-39.9953							231	32
eclipse34_debug.csv.cvs.csvdit,nomi.csv	dit,nomi	2	0.129371	0.00607524	26	0	11	0	-10.9939							234	33
eclipse34_swt.csv.cvs.csvdit,nomi.csv	dit,nomi	2	0.0363636	0.00407756	55	0	8	0	-7.99592							235	34
Mylyn.csvdit,nomi.csv	dit,nomi	2	0	0.00712489	3	0	26	0	-25.9929							232	35
single-version-ck-oo.csvdit,nomi.csv	dit,nomi	2	0.454545	0.0125974	11	0	37	0	-36.9874							233	36
churn.csvfanIn,fanOut.csv	fanIn,fanOut	2	1	0.00900952	14	0	13	0	-12.991	0.00580426	8					238	37
Eclipse JDT Core.csvfanIn,fanOut .csv	fanIn,fanOut	2	0.0421995	0.00437949	23	0	34	0	-33.9956							239	38
Eclipse PDE UI.csvfanIn,fanOut .csv	fanIn,fanOut	2	0	0.00412144	13	0	46	0	-45.9959							240	39
Equinox Framework.csvfanIn,fanOut .csv	fanIn,fanOut	2	0.125	0.00697587	16	0	11	0	-10.993							241	40
Lucene.csvfanIn,fanOut .csv	fanIn,fanOut	2	0	0.00779091	7	0	28	0	-27.9922							242	41
Mylyn.csvfanIn,fanOut .csv	fanIn,fanOut	2	0	0.00404648	18	0	44	0	-43.996							243	42
single-version-ck-oo.csvfanIn,fanOut .csv	fanIn,fanOut	2	0	0.00431708	23	0	34	0	-33.9957							244	43
churn.csvfanIn,noai.csv	fanIn,noai	2	0	0.00579332	16	0	26	0	-25.9942	0.0067331	6					295	44
Eclipse JDT Core.csvfanIn,noai.csv	fanIn,noai	2	0	0.00322636	23	0	55	0	-54.9968							290	45
Eclipse PDE UI.csvfanIn,noai.csv	fanIn,noai	2	0	0.00639305	6	0	34	0	-33.9936							291	46
Lucene.csvfanIn,noai.csv	fanIn,noai	2	0	0.0117057	4	0	16	0	-15.9883							292	47
Mylyn.csvfanIn,noai.csv	fanIn,noai	2	0	0.00990764	6	0	20	0	-19.9901							293	48
single-version-ck-oo.csvfanIn,noai.csv	fanIn,noai	2	0	0.00337252	23	0	55	0	-54.9966							294	49
Eclipse JDT Core.csvfanIn,noc .csv	fanIn,noc	2	0	0.00873218	9	0	18	0	-17.9913	0.00880742	4					303	50
Eclipse PDE UI.csvfanIn,noc .csv	fanIn,noc	2	0	0.00835068	5	0	24	0	-23.9916							304	51
Mylyn.csvfanIn,noc .csv	fanIn,noc	2	0	0.00986007	6	0	22	0	-21.9901							305	52
single-version-ck-oo.csvnoc,fanIn .csv	fanIn,noc	2	0	0.00828675	9	0	18	0	-17.9917							398	53
churn.csvfanIn,nomi.csv	fanIn,nomi	2	0	0.00742509	12	0	20	0	-19.9926	0.00470589	7					329	54
Eclipse JDT Core.csvfanIn,nomi.csv	fanIn,nomi	2	0	0.00282081	24	0	66	0	-65.9972							323	55
Eclipse PDE UI.csvfanIn,nomi.csv	fanIn,nomi	2	0	0.00293568	11	0	72	0	-71.9971							324	56
Equinox Framework.csvfanIn,nomi.csv	fanIn,nomi	2	0.214286	0.00756337	14	0	12	0	-11.9924							325	57
Lucene.csvfanIn,nomi.csv	fanIn,nomi	2	0	0.00589605	6	0	40	0	-39.9941							326	58
Mylyn.csvfanIn,nomi.csv	fanIn,nomi	2	0	0.00349446	13	0	60	0	-59.9965							327	59
single-version-ck-oo.csvfanIn,nomi.csv	fanIn,nomi	2	0	0.00280575	24	0	66	0	-65.9972							328	60
churn.csvfanOut,noai.csv	fanOut,noai	2	0.0152381	0.00558575	21	0	25	0	-24.9944	0.00469632	5					334	61
Eclipse JDT Core.csvfanOut,noai.csv	fanOut,noai	2	0	0.00274408	30	0	68	0	-67.9973							330	62
Eclipse PDE UI.csvfanOut,noai.csv	fanOut,noai	2	0	0.0045713	9	0	43	0	-42.9954							331	63
Mylyn.csvfanOut,noai.csv	fanOut,noai	2	0	0.0079061	7	0	23	0	-22.9921							332	64
single-version-ck-oo.csvfanOut,noai.csv	fanOut,noai	2	0	0.0026744	30	0	68	0	-67.9973							333	65
Eclipse JDT Core.csvfanOut,noc .csv	fanOut,noc	2	0	0.00717241	15	0	19	0	-18.9928	0.00753571	4					342	66
Eclipse PDE UI.csvfanOut,noc .csv	fanOut,noc	2	0	0.00782366	6	0	23	0	-22.9922							343	67
Mylyn.csvfanOut,noc .csv	fanOut,noc	2	0	0.00804675	5	0	21	0	-20.992							344	68
single-version-ck-oo.csvnoc,fanOut .csv	fanOut,noc	2	0.045614	0.00710003	15	0	19	0	-18.9929							406	69
churn.csvfanOut,nomi.csv	fanOut,nomi	2	0	0.00705683	16	0	20	0	-19.9929	0.00416124	7					368	70
Eclipse JDT Core.csvfanOut,nomi.csv	fanOut,nomi	2	0	0.00218486	30	0	83	0	-82.9978							362	71
Eclipse PDE UI.csvfanOut,nomi.csv	fanOut,nomi	2	0	0.00212879	20	0	98	0	-97.9979							363	72
Equinox Framework.csvfanOut,nomi.csv	fanOut,nomi	2	0.981481	0.00759361	18	0	15	0	-14.9924							364	73
Lucene.csvfanOut,nomi.csv	fanOut,nomi	2	0	0.00520355	6	0	43	0	-42.9948							365	74
Mylyn.csvfanOut,nomi.csv	fanOut,nomi	2	0	0.0027753	18	0	73	0	-72.9972							366	75
single-version-ck-oo.csvfanOut,nomi.csv	fanOut,nomi	2	0	0.00218573	30	0	83	0	-82.9978							367	76
ant-1.7.csvic,mfa.csv	ic,mfa	2	0	0.00388979	19	0	47	0	-46.9961	0.00563833	6					369	77
tomcat.csvic,mfa.csv	ic,mfa	2	0	0.00595021	5	0	38	0	-37.994							370	78
camel-1.2.csvmfa,ic.csv	ic,mfa	2	0	0.00720179	14	0	21	0	-20.9928							386	79
jedit-3.2.csvmfa,ic.csv	ic,mfa	2	1	0.0112156	12	0	11	0	-10.9888							387	80
prop-1.csvmfa,ic.csv	ic,mfa	2	0	0.00115577	52	0	165	0	-164.999							388	81
xalan-2.4.csvmfa,ic.csv	ic,mfa	2	0	0.00441678	11	0	45	0	-44.9956							389	82
eclipse34_debug.csv.cvs.csvIFANIN,nomi.csv	IFANIN,nomi	2	0	0.00972021	20	0	7	0	-6.99028	0.0101481	2					377	83
eclipse34_swt.csv.cvs.csvIFANIN,nomi.csv	IFANIN,nomi	2	0.106667	0.0105759	25	0	0	3	0.0105759							378	84
churn.csvnoai,nomi.csv	noai,nomi	2	0	0.00655205	15	0	25	0	-24.9934	0.00600452	8					392	85
Eclipse JDT Core.csvnoai,nomi.csv	noai,nomi	2	0	0.00419878	20	0	52	0	-51.9958							393	86
Eclipse PDE UI.csvnoai,nomi.csv	noai,nomi	2	0	0.00393733	8	0	50	0	-49.9961							394	87
Lucene.csvnoai,nomi.csv	noai,nomi	2	0	0.00951586	2	0	18	0	-17.9905							395	88
Mylyn.csvnoai,nomi.csv	noai,nomi	2	0	0.00868084	3	0	27	0	-26.9913							396	89
single-version-ck-oo.csvnoai,nomi.csv	noai,nomi	2	0	0.00351251	20	0	52	0	-51.9965							397	90
eclipse34_debug.csv.cvs.csvnomi,noai.csv	noai,nomi	2	0	0.0077801	24	0	12	0	-11.9922							444	91
eclipse34_swt.csv.cvs.csvnomi,noai.csv	noai,nomi	2	1	0.00385868	49	0	17	0	-16.9961							445	92
ant-1.7.csvnoc,mfa.csv	noc,mfa	2	0	0.00433136	18	0	41	0	-40.9957	0.00462181	5					412	93
camel-1.2.csvnoc,mfa.csv	noc,mfa	2	0	0.00707806	13	0	22	0	-21.9929							413	94
prop-1.csvnoc,mfa.csv	noc,mfa	2	0	0.00123457	47	0	162	0	-161.999							414	95
tomcat.csvnoc,mfa.csv	noc,mfa	2	0	0.00580384	5	0	35	0	-34.9942							415	96
xalan-2.4.csvnoc,mfa.csv	noc,mfa	2	0	0.00466123	11	0	42	0	-41.9953							416	97
churn.csvnoc,noai.csv	noc,noai	2	0.0357143	0.0106586	10	0	14	0	-13.9893	0.00780015	5					424	98
Eclipse JDT Core.csvnoc,noai.csv	noc,noai	2	0	0.00529512	17	0	34	0	-33.9947							421	99
Eclipse PDE UI.csvnoc,noai.csv	noc,noai	2	0	0.00859909	3	0	20	0	-19.9914							422	100
eclipse34_swt.csv.cvs.csvnoc,noai.csv	noc,noai	2	0	0.00965632	19	0	8	0	-7.99034							425	101
single-version-ck-oo.csvnoc,noai.csv	noc,noai	2	0	0.00479158	17	0	34	0	-33.9952							423	102
Eclipse JDT Core.csvnoc,nomi.csv	noc,nomi	2	0	0.00453185	14	0	43	0	-42.9955	0.00580577	7					432	103
Eclipse PDE UI.csvnoc,nomi.csv	noc,nomi	2	0	0.00481589	6	0	47	0	-46.9952							433	104
eclipse34_debug.csv.cvs.csvnoc,nomi.csv	noc,nomi	2	0.42963	0.00551831	18	0	15	0	-14.9945							437	105
eclipse34_swt.csv.cvs.csvnoc,nomi.csv	noc,nomi	2	0	0.00506917	40	0	10	0	-9.99493							438	106
Lucene.csvnoc,nomi.csv	noc,nomi	2	0	0.00944713	4	0	21	0	-20.9906							434	107
Mylyn.csvnoc,nomi.csv	noc,nomi	2	0	0.00678361	5	0	31	0	-30.9932							435	108
single-version-ck-oo.csvnoc,nomi.csv	noc,nomi	2	0	0.00447439	14	0	43	0	-42.9955							436	109
churn.csvdit,fanIn,fanOut.csv	dit,fanIn,fanOut	3	0.0751634	0.00764955	17	0	18	0	-17.9924	0.00482284	7					5	110
Eclipse JDT Core.csvdit,fanIn,fanOut .csv	dit,fanIn,fanOut	3	0.0117117	0.00240676	30	0	74	0	-73.9976							6	111
Eclipse PDE UI.csvdit,fanIn,fanOut .csv	dit,fanIn,fanOut	3	0	0.00196398	22	0	96	0	-95.998							7	112
Equinox Framework.csvdit,fanIn,fanOut .csv	dit,fanIn,fanOut	3	0.210526	0.0122828	19	0	14	0	-13.9877							8	113
Lucene.csvdit,fanIn,fanOut .csv	dit,fanIn,fanOut	3	0	0.0042191	8	0	46	0	-45.9958							9	114
Mylyn.csvdit,fanIn,fanOut .csv	dit,fanIn,fanOut	3	0	0.00286356	22	0	69	0	-68.9971							10	115
single-version-ck-oo.csvdit,fanIn,fanOut .csv	dit,fanIn,fanOut	3	0	0.0023741	30	0	74	0	-73.9976							11	116
churn.csvdit,fanIn,noai.csv	dit,fanIn,noai	3	0.00210084	0.00590564	17	0	28	0	-27.9941	0.00512564	6					62	117
Eclipse JDT Core.csvdit,fanIn,noai.csv	dit,fanIn,noai	3	0	0.00276794	27	0	71	0	-70.9972							57	118
Eclipse PDE UI.csvdit,fanIn,noai.csv	dit,fanIn,noai	3	0	0.00379972	10	0	55	0	-54.9962							58	119
Lucene.csvdit,fanIn,noai.csv	dit,fanIn,noai	3	0	0.00859325	5	0	24	0	-23.9914							59	120
Mylyn.csvdit,fanIn,noai.csv	dit,fanIn,noai	3	0	0.00717157	7	0	33	0	-32.9928							60	121
single-version-ck-oo.csvdit,fanIn,noai.csv	dit,fanIn,noai	3	0	0.00251571	27	0	71	0	-70.9975							61	122
Eclipse JDT Core.csvdit,fanIn,noc .csv	dit,fanIn,noc	3	0	0.00468322	17	0	36	0	-35.9953	0.0059048	5					70	123
Eclipse PDE UI.csvdit,fanIn,noc .csv	dit,fanIn,noc	3	0	0.00447561	7	0	45	0	-44.9955							71	124
Lucene.csvdit,fanIn,noc .csv	dit,fanIn,noc	3	0	0.00911119	6	0	22	0	-21.9909							72	125
Mylyn.csvdit,fanIn,noc .csv	dit,fanIn,noc	3	0	0.00657253	7	0	33	0	-32.9934							73	126
single-version-ck-oo.csvdit,noc,fanIn .csv	dit,fanIn,noc	3	0	0.00468144	17	0	36	0	-35.9953							182	127
churn.csvdit,fanIn,nomi.csv	dit,fanIn,nomi	3	0	0.00630993	15	0	27	0	-26.9937	0.00412761	7					97	128
Eclipse JDT Core.csvdit,fanIn,nomi.csv	dit,fanIn,nomi	3	0	0.00234283	26	0	81	0	-80.9977							91	129
Eclipse PDE UI.csvdit,fanIn,nomi.csv	dit,fanIn,nomi	3	0	0.00247495	14	0	86	0	-85.9975							92	130
Equinox Framework.csvdit,fanIn,nomi.csv	dit,fanIn,nomi	3	0.466667	0.00793412	15	0	13	0	-12.9921							93	131
Lucene.csvdit,fanIn,nomi.csv	dit,fanIn,nomi	3	0	0.0047791	7	0	46	0	-45.9952							94	132
Mylyn.csvdit,fanIn,nomi.csv	dit,fanIn,nomi	3	0	0.00270589	15	0	75	0	-74.9973							95	133
single-version-ck-oo.csvdit,fanIn,nomi.csv	dit,fanIn,nomi	3	0	0.00234645	26	0	81	0	-80.9977							96	134
churn.csvdit,fanOut,noai.csv	dit,fanOut,noai	3	0.240741	0.00536441	22	0	27	0	-26.9946	0.00404599	6					107	135
Eclipse JDT Core.csvdit,fanOut,noai.csv	dit,fanOut,noai	3	0	0.00217649	32	0	81	0	-80.9978							102	136
Eclipse PDE UI.csvdit,fanOut,noai.csv	dit,fanOut,noai	3	0	0.0027828	15	0	74	0	-73.9972							103	137
Lucene.csvdit,fanOut,noai.csv	dit,fanOut,noai	3	0	0.0066341	4	0	26	0	-25.9934							104	138
Mylyn.csvdit,fanOut,noai.csv	dit,fanOut,noai	3	0	0.00511156	10	0	36	0	-35.9949							105	139
single-version-ck-oo.csvdit,fanOut,noai.csv	dit,fanOut,noai	3	0	0.00220657	32	0	81	0	-80.9978							106	140
single-version-ck-oo.csvdit,noc,fanOut .csv	dit,fanOut,noc	3	0	0.00348926	23	0	45	0	-44.9965	0.00503183	5					190	141
Eclipse JDT Core.csvdit,fanOut,noc .csv	dit,fanOut,noc	3	0	0.00357744	23	0	45	0	-44.9964							115	142
Eclipse PDE UI.csvdit,fanOut,noc .csv	dit,fanOut,noc	3	0	0.00361542	12	0	55	0	-54.9964							116	143
Lucene.csvdit,fanOut,noc .csv	dit,fanOut,noc	3	0	0.00912773	6	0	22	0	-21.9909							117	144
Mylyn.csvdit,fanOut,noc .csv	dit,fanOut,noc	3	0	0.00534933	10	0	35	0	-34.9947							118	145
churn.csvdit,fanOut,nomi.csv	dit,fanOut,nomi	3	0	0.0053008	19	0	28	0	-27.9947	0.00923544	7					143	146
Eclipse JDT Core.csvdit,fanOut,nomi.csv	dit,fanOut,nomi	3	0	0.00202528	31	0	93	0	-92.998							137	147
Eclipse PDE UI.csvdit,fanOut,nomi.csv	dit,fanOut,nomi	3	0	0.00182221	21	0	113	0	-112.998							138	148
Equinox Framework.csvdit,fanOut,nomi.csv	dit,fanOut,nomi	3	0.222222	0.0459391	18	0	16	0	-15.9541							139	149
Lucene.csvdit,fanOut,nomi.csv	dit,fanOut,nomi	3	0	0.00508911	7	0	49	0	-48.9949							140	150
Mylyn.csvdit,fanOut,nomi.csv	dit,fanOut,nomi	3	0	0.0023737	19	0	87	0	-86.9976							141	151
single-version-ck-oo.csvdit,fanOut,nomi.csv	dit,fanOut,nomi	3	0	0.00209782	31	0	93	0	-92.9979							142	152
ant-1.7.csvdit,ic,mfa.csv	dit,ic,mfa	3	0.7	0.012587	19	1	50	0	-49.9874	0.00666368	7					144	153
tomcat.csvdit,ic,mfa.csv	dit,ic,mfa	3	0	0.00569224	5	0	40	0	-39.9943							145	154
camel-1.2.csvdit,mfa,ic.csv	dit,ic,mfa	3	0	0.00630327	14	0	24	0	-23.9937							165	155
jedit-3.2.csvdit,mfa,ic.csv	dit,ic,mfa	3	0.340278	0.010145	12	0	12	0	-11.9899							166	156
prop-1.csvdit,mfa,ic.csv	dit,ic,mfa	3	0	0.000883099	68	0	215	0	-214.999							167	157
xalan-2.4.csvdit,mfa,ic.csv	dit,ic,mfa	3	0	0.0039436	12	0	47	0	-46.9961							168	158
prop-1.csvdit,noc,ic.csv	dit,ic,mfa	3	0	0.00709153	6	0	30	0	-29.9929							194	159
eclipse34_debug.csv.cvs.csvdit,IFANIN,noai.csv	dit,IFANIN,noai	3	0.333333	0.00777032	21	0	12	0	-11.9922	0.00701736	2					146	160
eclipse34_swt.csv.cvs.csvdit,IFANIN,noai.csv	dit,IFANIN,noai	3	0.0322581	0.0062644	31	0	0	9	0.0062644							147	161
eclipse34_debug.csv.cvs.csvdit,IFANIN,noc.csv	dit,IFANIN,noc	3	0.153846	0.0185485	13	0	11	0	-10.9815	0.0137913	2					148	162
eclipse34_swt.csv.cvs.csvdit,IFANIN,noc.csv	dit,IFANIN,noc	3	0	0.00903406	18	0	0	7	0.00903406							149	163
eclipse34_debug.csv.cvs.csvdit,IFANIN,nomi.csv	dit,IFANIN,nomi	3	0.415404	0.0035245	33	0	24	0	-23.9965	0.00334584	2					156	164
eclipse34_swt.csv.cvs.csvdit,IFANIN,nomi.csv	dit,IFANIN,nomi	3	0.157895	0.00316718	57	0	0	11	0.00316718							157	165
ant-1.7.csvdit,noc,mfa.csv	dit,mfa,noc	3	0	0.00367126	19	0	47	0	-46.9963	0.00577359	6					197	166
camel-1.2.csvdit,noc,mfa.csv	dit,mfa,noc	3	0	0.00722613	14	0	27	0	-26.9928							198	167
jedit-3.2.csvdit,noc,mfa.csv	dit,mfa,noc	3	0.208333	0.0133022	10	0	12	0	-11.9867							199	168
prop-1.csvdit,noc,mfa.csv	dit,mfa,noc	3	0	0.00088743	62	0	216	0	-215.999							200	169
tomcat.csvdit,noc,mfa.csv	dit,mfa,noc	3	0	0.0050428	5	0	39	0	-38.995							201	170
xalan-2.4.csvdit,noc,mfa.csv	dit,mfa,noc	3	0	0.00451171	12	0	45	0	-44.9955							202	171
churn.csvdit,noai,nomi.csv	dit,noai,nomi	3	0	0.00585193	15	0	27	0	-26.9941	0.00435103	8					179	172
Eclipse JDT Core.csvdit,noai,nomi.csv	dit,noai,nomi	3	0	0.00327131	20	0	56	0	-55.9967							174	173
Eclipse PDE UI.csvdit,noai,nomi.csv	dit,noai,nomi	3	0	0.00372247	10	0	58	0	-57.9963							175	174
Lucene.csvdit,noai,nomi.csv	dit,noai,nomi	3	0	0.00723147	2	0	22	0	-21.9928							176	175
Mylyn.csvdit,noai,nomi.csv	dit,noai,nomi	3	0	0.00553478	4	0	35	0	-34.9945							177	176
single-version-ck-oo.csvdit,noai,nomi.csv	dit,noai,nomi	3	0	0.00326568	20	0	56	0	-55.9967							178	177
eclipse34_debug.csv.cvs.csvdit,nomi,noai.csv	dit,noai,nomi	3	0.0312945	0.00351782	37	0	38	0	-37.9965							236	178
eclipse34_swt.csv.cvs.csvdit,nomi,noai.csv	dit,noai,nomi	3	0.0972222	0.00241281	72	0	33	0	-32.9976							237	179
churn.csvdit,noc,noai.csv	dit,noc,noai	3	0.0121212	0.00994045	11	0	15	0	-14.9901	0.00620535	7					211	180
Eclipse JDT Core.csvdit,noc,noai.csv	dit,noc,noai	3	0	0.00377743	20	0	50	0	-49.9962							207	181
Eclipse PDE UI.csvdit,noc,noai.csv	dit,noc,noai	3	0	0.00668224	6	0	37	0	-36.9933							208	182
eclipse34_debug.csv.cvs.csvdit,noc,noai.csv	dit,noc,noai	3	0.380952	0.00411229	21	0	18	0	-17.9959							212	183
eclipse34_swt.csv.cvs.csvdit,noc,noai.csv	dit,noc,noai	3	0.0243902	0.00441119	41	0	17	0	-16.9956							213	184
Mylyn.csvdit,noc,noai.csv	dit,noc,noai	3	0	0.011112	3	0	17	0	-16.9889							209	185
single-version-ck-oo.csvdit,noc,noai.csv	dit,noc,noai	3	0	0.0034019	20	0	50	0	-49.9966							210	186
churn.csvdit,noc,nomi.csv	dit,noc,nomi	3	0	0.010381	6	0	15	0	-14.9896	0.00494883	8					225	187
Eclipse JDT Core.csvdit,noc,nomi.csv	dit,noc,nomi	3	0	0.00337193	17	0	57	0	-56.9966							220	188
Eclipse PDE UI.csvdit,noc,nomi.csv	dit,noc,nomi	3	0	0.00358504	9	0	62	0	-61.9964							221	189
eclipse34_debug.csv.cvs.csvdit,noc,nomi.csv	dit,noc,nomi	3	0	0.00350931	33	0	37	0	-36.9965							226	190
eclipse34_swt.csv.cvs.csvdit,noc,nomi.csv	dit,noc,nomi	3	0.1	0.00264397	70	0	23	0	-22.9974							227	191
Lucene.csvdit,noc,nomi.csv	dit,noc,nomi	3	0	0.00822666	5	0	27	0	-26.9918							222	192
Mylyn.csvdit,noc,nomi.csv	dit,noc,nomi	3	0	0.00446761	6	0	43	0	-42.9955							223	193
single-version-ck-oo.csvdit,noc,nomi.csv	dit,noc,nomi	3	0	0.00340511	17	0	57	0	-56.9966							224	194
churn.csvfanIn,fanOut,noai.csv	fanIn,fanOut,noai	3	0.00258398	0.00338572	27	0	43	0	-42.9966	0.00362157	7					251	195
Eclipse JDT Core.csvfanIn,fanOut,noai.csv	fanIn,fanOut,noai	3	0	0.00177765	37	0	105	0	-104.998							245	196
Eclipse PDE UI.csvfanIn,fanOut,noai.csv	fanIn,fanOut,noai	3	0	0.00218404	23	0	97	0	-96.9978							246	197
Equinox Framework.csvfanIn,fanOut,noai.csv	fanIn,fanOut,noai	3	0.0526316	0.00832568	19	0	15	0	-14.9917							247	198
Lucene.csvfanIn,fanOut,noai.csv	fanIn,fanOut,noai	3	0	0.00504381	8	0	46	0	-45.995							248	199
Mylyn.csvfanIn,fanOut,noai.csv	fanIn,fanOut,noai	3	0	0.00273014	21	0	70	0	-69.9973							249	200
single-version-ck-oo.csvfanIn,fanOut,noai.csv	fanIn,fanOut,noai	3	0	0.00190392	37	0	105	0	-104.998							250	201
churn.csvfanIn,fanOut,noc.csv	fanIn,fanOut,noc	3	0	0.00727292	16	0	19	0	-18.9927	0.00521079	7					259	202
Eclipse JDT Core.csvfanIn,fanOut,noc .csv	fanIn,fanOut,noc	3	0	0.00299279	28	0	54	0	-53.997							260	203
Eclipse PDE UI.csvfanIn,fanOut,noc .csv	fanIn,fanOut,noc	3	0	0.00300198	17	0	71	0	-70.997							261	204
Equinox Framework.csvfanIn,fanOut,noc .csv	fanIn,fanOut,noc	3	0.117647	0.01189	17	0	0	12	0.01189							262	205
Lucene.csvfanIn,fanOut,noc .csv	fanIn,fanOut,noc	3	0	0.00527392	8	0	38	0	-37.9947							263	206
Mylyn.csvfanIn,fanOut,noc .csv	fanIn,fanOut,noc	3	0	0.00293891	21	0	65	0	-64.9971							264	207
single-version-ck-oo.csvnoc,fanIn,fanOut .csv	fanIn,fanOut,noc	3	0	0.00310502	28	0	54	0	-53.9969							399	208
churn.csvfanIn,fanOut,nomi.csv	fanIn,fanOut,nomi	3	0	0.00371704	25	0	41	0	-40.9963	0.0019467	7					289	209
Eclipse JDT Core.csvfanIn,fanOut,nomi.csv	fanIn,fanOut,nomi	3	0.00272541	0.00171658	37	0	119	0	-118.998							283	210
Eclipse PDE UI.csvfanIn,fanOut,nomi.csv	fanIn,fanOut,nomi	3	0	0.00136682	31	0	154	0	-153.999							284	211
Equinox Framework.csvfanIn,fanOut,nomi.csv	fanIn,fanOut,nomi	3	0.583333	0.00123964	24	0	22	0	-21.9988							285	212
Lucene.csvfanIn,fanOut,nomi.csv	fanIn,fanOut,nomi	3	0	0.00255817	10	0	80	0	-79.9974							286	213
Mylyn.csvfanIn,fanOut,nomi.csv	fanIn,fanOut,nomi	3	0	0.00144258	30	0	142	0	-141.999							287	214
single-version-ck-oo.csvfanIn,fanOut,nomi.csv	fanIn,fanOut,nomi	3	0	0.00158605	37	0	119	0	-118.998							288	215
churn.csvfanIn,noai,nomi.csv	fanIn,noai,nomi	3	0	0.00340166	23	0	47	0	-46.9966	0.00290552	7					302	216
Eclipse JDT Core.csvfanIn,noai,nomi.csv	fanIn,noai,nomi	3	0	0.00206145	30	0	92	0	-91.9979							296	217
Eclipse PDE UI.csvfanIn,noai,nomi.csv	fanIn,noai,nomi	3	0	0.00246178	17	0	92	0	-91.9975							297	218
Equinox Framework.csvfanIn,noai,nomi.csv	fanIn,noai,nomi	3	0.294118	0.00327056	17	0	0	12	0.00327056							298	219
Lucene.csvfanIn,noai,nomi.csv	fanIn,noai,nomi	3	0	0.00431692	7	0	48	0	-47.9957							299	220
Mylyn.csvfanIn,noai,nomi.csv	fanIn,noai,nomi	3	0	0.00277088	15	0	73	0	-72.9972							300	221
single-version-ck-oo.csvfanIn,noai,nomi.csv	fanIn,noai,nomi	3	0	0.0020554	30	0	92	0	-91.9979							301	222
churn.csvfanIn,noc,noai.csv	fanIn,noc,noai	3	0	0.0052151	19	0	30	0	-29.9948	0.00488576	6					310	223
Eclipse JDT Core.csvfanIn,noc,noai.csv	fanIn,noc,noai	3	0	0.00249201	27	0	70	0	-69.9975							306	224
Eclipse PDE UI.csvfanIn,noc,noai.csv	fanIn,noc,noai	3	0	0.00420181	9	0	54	0	-53.9958							307	225
Lucene.csvfanIn,noc,noai.csv	fanIn,noc,noai	3	0	0.00824573	6	0	25	0	-24.9918							308	226
Mylyn.csvfanIn,noc,noai.csv	fanIn,noc,noai	3	0	0.00590584	8	0	35	0	-34.9941							309	227
single-version-ck-oo.csvnoc,fanIn,noai.csv	fanIn,noc,noai	3	0	0.00325408	27	0	70	0	-69.9967							403	228
churn.csvfanIn,noc,nomi.csv	fanIn,noc,nomi	3	0	0.0059014	14	0	27	0	-26.9941	0.00368423	7					322	229
Eclipse JDT Core.csvfanIn,noc,nomi.csv	fanIn,noc,nomi	3	0	0.0025865	28	0	79	0	-78.9974							317	230
Eclipse PDE UI.csvfanIn,noc,nomi.csv	fanIn,noc,nomi	3	0	0.00260523	15	0	89	0	-88.9974							318	231
Equinox Framework.csvfanIn,noc,nomi.csv	fanIn,noc,nomi	3	0.3125	0.00547697	16	0	12	0	-11.9945							319	232
Lucene.csvfanIn,noc,nomi.csv	fanIn,noc,nomi	3	0	0.0042285	7	0	49	0	-48.9958							320	233
Mylyn.csvfanIn,noc,nomi.csv	fanIn,noc,nomi	3	0	0.00266571	15	0	81	0	-80.9973							321	234
single-version-ck-oo.csvnoc,fanIn,nomi.csv	fanIn,noc,nomi	3	0.00045208	0.0023253	28	0	79	0	-78.9977							405	235
churn.csvfanOut,noai,nomi.csv	fanOut,noai,nomi	3	0	0.00331165	27	0	48	0	-47.9967	0.00237818	7					341	236
Eclipse JDT Core.csvfanOut,noai,nomi.csv	fanOut,noai,nomi	3	0	0.00186115	34	0	99	0	-98.9981							335	237
Eclipse PDE UI.csvfanOut,noai,nomi.csv	fanOut,noai,nomi	3	0	0.00176832	23	0	119	0	-118.998							336	238
Equinox Framework.csvfanOut,noai,nomi.csv	fanOut,noai,nomi	3	0.631579	0.000880152	19	0	17	0	-16.9991							337	239
Lucene.csvfanOut,noai,nomi.csv	fanOut,noai,nomi	3	0	0.00459975	7	0	52	0	-51.9954							338	240
Mylyn.csvfanOut,noai,nomi.csv	fanOut,noai,nomi	3	0	0.00236799	19	0	85	0	-84.9976							339	241
single-version-ck-oo.csvfanOut,noai,nomi.csv	fanOut,noai,nomi	3	0	0.00185824	34	0	99	0	-98.9981							340	242
churn.csvfanOut,noc,noai.csv	fanOut,noc,noai	3	0	0.0046457	23	0	31	0	-30.9954	0.00416503	6					349	243
Eclipse JDT Core.csvfanOut,noc,noai.csv	fanOut,noc,noai	3	0	0.00211354	33	0	84	0	-83.9979							345	244
Eclipse PDE UI.csvfanOut,noc,noai.csv	fanOut,noc,noai	3	0	0.00314186	14	0	66	0	-65.9969							346	245
Lucene.csvfanOut,noc,noai.csv	fanOut,noc,noai	3	0	0.00799378	6	0	26	0	-25.992							347	246
Mylyn.csvfanOut,noc,noai.csv	fanOut,noc,noai	3	0	0.00489231	9	0	40	0	-39.9951							348	247
single-version-ck-oo.csvnoc,fanOut,noai.csv	fanOut,noc,noai	3	0	0.00220302	33	0	84	0	-83.9978							407	248
churn.csvfanOut,noc,nomi.csv	fanOut,noc,nomi	3	0	0.00548922	18	0	27	0	-26.9945	0.00483265	7					361	249
Eclipse JDT Core.csvfanOut,noc,nomi.csv	fanOut,noc,nomi	3	0	0.00184683	34	0	100	0	-99.9982							356	250
Eclipse PDE UI.csvfanOut,noc,nomi.csv	fanOut,noc,nomi	3	0	0.00172567	23	0	121	0	-120.998							357	251
Equinox Framework.csvfanOut,noc,nomi.csv	fanOut,noc,nomi	3	0.05	0.0171246	20	0	17	0	-16.9829							358	252
Lucene.csvfanOut,noc,nomi.csv	fanOut,noc,nomi	3	0	0.00368464	8	0	55	0	-54.9963							359	253
Mylyn.csvfanOut,noc,nomi.csv	fanOut,noc,nomi	3	0	0.00211298	20	0	96	0	-95.9979							360	254
single-version-ck-oo.csvnoc,fanOut,nomi.csv	fanOut,noc,nomi	3	0	0.00184458	34	0	100	0	-99.9982							409	255
ant-1.7.csvnoc,ic,mfa.csv	ic,mfa,noc	3	0	0.00397564	20	0	53	0	-52.996	0.00510269	6					410	256
tomcat.csvnoc,ic,mfa.csv	ic,mfa,noc	3	0	0.00531597	6	0	42	0	-41.9947							411	257
camel-1.2.csvnoc,mfa,ic.csv	ic,mfa,noc	3	0.00533333	0.00634834	15	0	25	0	-24.9937							417	258
jedit-3.2.csvnoc,mfa,ic.csv	ic,mfa,noc	3	0.102564	0.0101391	12	0	13	0	-12.9899							418	259
prop-1.csvnoc,mfa,ic.csv	ic,mfa,noc	3	0	0.000867884	64	0	225	0	-224.999							419	260
xalan-2.4.csvnoc,mfa,ic.csv	ic,mfa,noc	3	0	0.00396919	12	0	49	0	-48.996							420	261
eclipse34_debug.csv.cvs.csvIFANIN,noc,noai.csv	IFANIN,noc,noai	3	0.0555556	0.0109912	18	0	13	0	-12.989	0.00892253	2					371	262
eclipse34_swt.csv.cvs.csvIFANIN,noc,noai.csv	IFANIN,noc,noai	3	0	0.00685389	22	0	0	12	0.00685389							372	263
eclipse34_debug.csv.cvs.csvIFANIN,noc,nomi.csv	IFANIN,noc,nomi	3	0.074359	0.0043079	26	0	30	0	-29.9957	0.00428964	2					373	264
eclipse34_swt.csv.cvs.csvIFANIN,noc,nomi.csv	IFANIN,noc,nomi	3	0.139535	0.00427137	43	0	0	14	0.00427137							374	265
eclipse34_debug.csv.cvs.csvIFANIN,nomi,noai.csv	IFANIN,nomi,noai	3	0.46875	0.00253868	32	0	26	0	-25.9975	0.00291024	2					379	266
eclipse34_swt.csv.cvs.csvIFANIN,nomi,noai.csv	IFANIN,nomi,noai	3	0.0980392	0.00328181	51	0	21	0	-20.9967							380	267
churn.csvnoc,noai,nomi.csv	noc,noai,nomi	3	0	0.00533842	17	0	30	0	-29.9947	0.0040526	8					431	268
Eclipse JDT Core.csvnoc,noai,nomi.csv	noc,noai,nomi	3	0	0.00271216	25	0	70	0	-69.9973							426	269
Eclipse PDE UI.csvnoc,noai,nomi.csv	noc,noai,nomi	3	0	0.00278987	11	0	72	0	-71.9972							427	270
Lucene.csvnoc,noai,nomi.csv	noc,noai,nomi	3	0	0.0070566	5	0	30	0	-29.9929							428	271
Mylyn.csvnoc,noai,nomi.csv	noc,noai,nomi	3	0	0.00499307	6	0	43	0	-42.995							429	272
single-version-ck-oo.csvnoc,noai,nomi.csv	noc,noai,nomi	3	0	0.0028785	25	0	70	0	-69.9971							430	273
eclipse34_debug.csv.cvs.csvnoc,nomi,noai.csv	noc,noai,nomi	3	0.468817	0.00397241	30	0	31	0	-30.996							439	274
eclipse34_swt.csv.cvs.csvnoc,nomi,noai.csv	noc,noai,nomi	3	0	0.00267973	65	0	30	0	-29.9973							440	275
churn.csvdit,fanIn,fanOut,noai.csv	dit,fanIn,fanOut,noai	4	0.00405844	0.00356159	28	0	44	0	-43.9964	0.00438649	7					18	276
Eclipse JDT Core.csvdit,fanIn,fanOut,noai.csv	dit,fanIn,fanOut,noai	4	0	0.00160792	38	0	116	0	-115.998							12	277
Eclipse PDE UI.csvdit,fanIn,fanOut,noai.csv	dit,fanIn,fanOut,noai	4	0	0.00159019	28	0	127	0	-126.998							13	278
Equinox Framework.csvdit,fanIn,fanOut,noai.csv	dit,fanIn,fanOut,noai	4	0.3	0.0160323	20	0	0	15	0.0160323							14	279
Lucene.csvdit,fanIn,fanOut,noai.csv	dit,fanIn,fanOut,noai	4	0	0.00408753	9	0	61	0	-60.9959							15	280
Mylyn.csvdit,fanIn,fanOut,noai.csv	dit,fanIn,fanOut,noai	4	0	0.00216175	24	0	91	0	-90.9978							16	281
single-version-ck-oo.csvdit,fanIn,fanOut,noai.csv	dit,fanIn,fanOut,noai	4	0	0.0016641	38	0	116	0	-115.998							17	282
churn.csvdit,fanIn,fanOut,noc.csv	dit,fanIn,fanOut,noc	4	0.0042735	0.00575723	18	0	26	0	-25.9942	0.00400418	7					26	283
single-version-ck-oo.csvdit,noc,fanIn,fanOut .csv	dit,fanIn,fanOut,noc	4	0	0.0021071	33	0	87	0	-86.9979							183	284
Eclipse JDT Core.csvdit,fanIn,fanOut,noc .csv	dit,fanIn,fanOut,noc	4	0	0.00210728	33	0	87	0	-86.9979							27	285
Eclipse PDE UI.csvdit,fanIn,fanOut,noc .csv	dit,fanIn,fanOut,noc	4	0	0.00169165	24	0	118	0	-117.998							28	286
Equinox Framework.csvdit,fanIn,fanOut,noc .csv	dit,fanIn,fanOut,noc	4	0.210526	0.0105735	19	0	0	15	0.0105735							29	287
Lucene.csvdit,fanIn,fanOut,noc .csv	dit,fanIn,fanOut,noc	4	0	0.00353287	9	0	56	0	-55.9965							30	288
Mylyn.csvdit,fanIn,fanOut,noc .csv	dit,fanIn,fanOut,noc	4	0	0.00225967	24	0	91	0	-90.9977							31	289
churn.csvdit,fanIn,fanOut,nomi.csv	dit,fanIn,fanOut,nomi	4	0	0.00332883	26	0	49	0	-48.9967	0.0344486	7					56	290
Eclipse JDT Core.csvdit,fanIn,fanOut,nomi.csv	dit,fanIn,fanOut,nomi	4	0	0.00152808	37	0	123	0	-122.998							50	291
Eclipse PDE UI.csvdit,fanIn,fanOut,nomi.csv	dit,fanIn,fanOut,nomi	4	0	0.00127442	31	0	160	0	-159.999							51	292
Equinox Framework.csvdit,fanIn,fanOut,nomi.csv	dit,fanIn,fanOut,nomi	4	0.0473485	0.229362	13	11	22	0	-21.7706							52	293
Lucene.csvdit,fanIn,fanOut,nomi.csv	dit,fanIn,fanOut,nomi	4	0	0.00271662	11	0	82	0	-81.9973							53	294
Mylyn.csvdit,fanIn,fanOut,nomi.csv	dit,fanIn,fanOut,nomi	4	0	0.00138565	30	0	148	0	-147.999							54	295
single-version-ck-oo.csvdit,fanIn,fanOut,nomi.csv	dit,fanIn,fanOut,nomi	4	0	0.00154468	37	0	123	0	-122.998							55	296
churn.csvdit,fanIn,noai,nomi.csv	dit,fanIn,noai,nomi	4	0	0.0034349	23	0	48	0	-47.9966	0.0133952	7					69	297
Eclipse JDT Core.csvdit,fanIn,noai,nomi.csv	dit,fanIn,noai,nomi	4	0	0.00199408	30	0	94	0	-93.998							63	298
Eclipse PDE UI.csvdit,fanIn,noai,nomi.csv	dit,fanIn,noai,nomi	4	0	0.00243205	18	0	99	0	-98.9976							64	299
Equinox Framework.csvdit,fanIn,noai,nomi.csv	dit,fanIn,noai,nomi	4	0.0588235	0.077571	17	0	0	13	0.077571							65	300
Lucene.csvdit,fanIn,noai,nomi.csv	dit,fanIn,noai,nomi	4	0	0.00382706	7	0	51	0	-50.9962							66	301
Mylyn.csvdit,fanIn,noai,nomi.csv	dit,fanIn,noai,nomi	4	0	0.00251716	17	0	82	0	-81.9975							67	302
single-version-ck-oo.csvdit,fanIn,noai,nomi.csv	dit,fanIn,noai,nomi	4	0	0.00199035	30	0	94	0	-93.998							68	303
churn.csvdit,fanIn,noc,noai.csv	dit,fanIn,noc,noai	4	0	0.00485885	19	0	32	0	-31.9951	0.00375739	6					78	304
Eclipse JDT Core.csvdit,fanIn,noc,noai.csv	dit,fanIn,noc,noai	4	0	0.00218169	29	0	83	0	-82.9978							74	305
Eclipse PDE UI.csvdit,fanIn,noc,noai.csv	dit,fanIn,noc,noai	4	0	0.00351264	13	0	71	0	-70.9965							75	306
Lucene.csvdit,fanIn,noc,noai.csv	dit,fanIn,noc,noai	4	0	0.00578172	7	0	34	0	-33.9942							76	307
Mylyn.csvdit,fanIn,noc,noai.csv	dit,fanIn,noc,noai	4	0	0.00380498	9	0	49	0	-48.9962							77	308
single-version-ck-oo.csvdit,noc,fanIn,noai.csv	dit,fanIn,noc,noai	4	0	0.00240445	29	0	83	0	-82.9976							187	309
churn.csvdit,fanIn,noc,nomi.csv	dit,fanIn,noc,nomi	4	0	0.00501199	16	0	34	0	-33.995	0.00726221	7					90	310
Eclipse JDT Core.csvdit,fanIn,noc,nomi.csv	dit,fanIn,noc,nomi	4	0	0.00202118	29	0	93	0	-92.998							85	311
Eclipse PDE UI.csvdit,fanIn,noc,nomi.csv	dit,fanIn,noc,nomi	4	0	0.00213714	17	0	101	0	-100.998							86	312
Equinox Framework.csvdit,fanIn,noc,nomi.csv	dit,fanIn,noc,nomi	4	0.4375	0.0337377	16	0	0	14	0.0337377							87	313
Lucene.csvdit,fanIn,noc,nomi.csv	dit,fanIn,noc,nomi	4	0	0.00358439	7	0	55	0	-54.9964							88	314
Mylyn.csvdit,fanIn,noc,nomi.csv	dit,fanIn,noc,nomi	4	0	0.00220211	17	0	94	0	-93.9978							89	315
single-version-ck-oo.csvdit,noc,fanIn,nomi.csv	dit,fanIn,noc,nomi	4	0	0.002141	29	0	93	0	-92.9979							189	316
churn.csvdit,fanOut,noai,nomi.csv	dit,fanOut,noai,nomi	4	0	0.00326032	27	0	48	0	-47.9967	0.011298	7					114	317
Eclipse JDT Core.csvdit,fanOut,noai,nomi.csv	dit,fanOut,noai,nomi	4	0	0.00195315	34	0	100	0	-99.998							108	318
Eclipse PDE UI.csvdit,fanOut,noai,nomi.csv	dit,fanOut,noai,nomi	4	0	0.00163413	23	0	126	0	-125.998							109	319
Equinox Framework.csvdit,fanOut,noai,nomi.csv	dit,fanOut,noai,nomi	4	0.263158	0.0641849	19	0	0	17	0.0641849							110	320
Lucene.csvdit,fanOut,noai,nomi.csv	dit,fanOut,noai,nomi	4	0	0.00388639	7	0	54	0	-53.9961							111	321
Mylyn.csvdit,fanOut,noai,nomi.csv	dit,fanOut,noai,nomi	4	0	0.00216204	19	0	93	0	-92.9978							112	322
single-version-ck-oo.csvdit,fanOut,noai,nomi.csv	dit,fanOut,noai,nomi	4	0	0.00200512	34	0	100	0	-99.998							113	323
churn.csvdit,fanOut,noc,noai.csv	dit,fanOut,noc,noai	4	0.00390625	0.00461617	24	0	32	0	-31.9954	0.00538178	7					124	324
Eclipse JDT Core.csvdit,fanOut,noc,noai.csv	dit,fanOut,noc,noai	4	0	0.00193526	35	0	94	0	-93.9981							119	325
Eclipse PDE UI.csvdit,fanOut,noc,noai.csv	dit,fanOut,noc,noai	4	0	0.00208529	19	0	97	0	-96.9979							120	326
Equinox Framework.csvdit,fanOut,noc,noai.csv	dit,fanOut,noc,noai	4	0.214286	0.0176696	14	0	0	8	0.0176696							121	327
Lucene.csvdit,fanOut,noc,noai.csv	dit,fanOut,noc,noai	4	0	0.00574662	8	0	37	0	-36.9943							122	328
Mylyn.csvdit,fanOut,noc,noai.csv	dit,fanOut,noc,noai	4	0	0.00364166	13	0	55	0	-54.9964							123	329
single-version-ck-oo.csvdit,noc,fanOut,noai.csv	dit,fanOut,noc,noai	4	0	0.00197782	35	0	94	0	-93.998							191	330
churn.csvdit,fanOut,noc,nomi.csv	dit,fanOut,noc,nomi	4	0	0.00487442	21	0	34	0	-33.9951	0.00740976	7					136	331
Eclipse JDT Core.csvdit,fanOut,noc,nomi.csv	dit,fanOut,noc,nomi	4	0	0.00179366	35	0	105	0	-104.998							131	332
Eclipse PDE UI.csvdit,fanOut,noc,nomi.csv	dit,fanOut,noc,nomi	4	0	0.00159184	24	0	131	0	-130.998							132	333
Equinox Framework.csvdit,fanOut,noc,nomi.csv	dit,fanOut,noc,nomi	4	0.05	0.0366024	20	0	18	0	-17.9634							133	334
Lucene.csvdit,fanOut,noc,nomi.csv	dit,fanOut,noc,nomi	4	0	0.00330651	9	0	60	0	-59.9967							134	335
Mylyn.csvdit,fanOut,noc,nomi.csv	dit,fanOut,noc,nomi	4	0	0.00189868	21	0	108	0	-107.998							135	336
single-version-ck-oo.csvdit,noc,fanOut,nomi.csv	dit,fanOut,noc,nomi	4	0	0.00180079	35	0	105	0	-104.998							193	337
ant-1.7.csvdit,noc,ic,mfa.csv	dit,ic,noc,mfa	4	0	0.00353392	21	0	55	0	-54.9965	0.00659285	6					195	338
tomcat.csvdit,noc,ic,mfa.csv	dit,ic,noc,mfa	4	0.5	0.0159337	0	6	44	0	-43.9841							196	339
camel-1.2.csvdit,noc,mfa,ic.csv	dit,ic,noc,mfa	4	0	0.00581312	16	0	28	0	-27.9942							203	340
jedit-3.2.csvdit,noc,mfa,ic.csv	dit,ic,noc,mfa	4	0.202381	0.00945522	12	0	14	0	-13.9905							204	341
prop-1.csvdit,noc,mfa,ic.csv	dit,ic,noc,mfa	4	0.0126582	0.000723343	79	0	271	0	-270.999							205	342
xalan-2.4.csvdit,noc,mfa,ic.csv	dit,ic,noc,mfa	4	0	0.00409775	13	0	51	0	-50.9959							206	343
eclipse34_debug.csv.cvs.csvdit,IFANIN,noc,noai.csv	dit,IFANIN,noc,noai	4	0.607143	0.00964367	25	3	28	0	-27.9904	0.00652859	2					150	344
eclipse34_swt.csv.cvs.csvdit,IFANIN,noc,noai.csv	dit,IFANIN,noc,noai	4	0.214286	0.00341351	42	0	0	21	0.00341351							151	345
eclipse34_debug.csv.cvs.csvdit,IFANIN,noc,nomi.csv	dit,IFANIN,noc,nomi	4	0.000526316	0.00277268	38	0	50	0	-49.9972	0.00259182	2					152	346
eclipse34_swt.csv.cvs.csvdit,IFANIN,noc,nomi.csv	dit,IFANIN,noc,nomi	4	0.239437	0.00241097	71	0	0	26	0.00241097							153	347
eclipse34_debug.csv.cvs.csvdit,IFANIN,nomi,noai.csv	dit,IFANIN,nomi,noai	4	0	0.0028043	40	0	53	0	-52.9972	0.00255631	2					158	348
eclipse34_swt.csv.cvs.csvdit,IFANIN,nomi,noai.csv	dit,IFANIN,nomi,noai	4	0.166667	0.00230832	72	0	37	0	-36.9977							159	349
churn.csvdit,noc,noai,nomi.csv	dit,noc,noai,nomi	4	0	0.00487056	17	0	32	0	-31.9951	0.00373031	6					219	350
Eclipse JDT Core.csvdit,noc,noai,nomi.csv	dit,noc,noai,nomi	4	0	0.00251435	25	0	73	0	-72.9975							214	351
Eclipse PDE UI.csvdit,noc,noai,nomi.csv	dit,noc,noai,nomi	4	0	0.00266831	13	0	79	0	-78.9973							215	352
Lucene.csvdit,noc,noai,nomi.csv	dit,noc,noai,nomi	4	0	0.00584685	5	0	33	0	-32.9942							216	353
Mylyn.csvdit,noc,noai,nomi.csv	dit,noc,noai,nomi	4	0	0.00397114	7	0	51	0	-50.996							217	354
single-version-ck-oo.csvdit,noc,noai,nomi.csv	dit,noc,noai,nomi	4	0	0.00251066	25	0	73	0	-72.9975							218	355
eclipse34_debug.csv.cvs.csvdit,noc,nomi,noai.csv	dit,noc,nomi,noai	4	0	0.00244129	41	0	61	0	-60.9976	0.00202953	2					228	356
eclipse34_swt.csv.cvs.csvdit,noc,nomi,noai.csv	dit,noc,nomi,noai	4	0.219512	0.00161777	82	0	50	0	-49.9984							229	357
churn.csvfanIn,fanOut,noai,nomi.csv	fanIn,fanOut,noai,nomi	4	0	0.00252974	32	0	67	0	-66.9975	0.00231519	7					258	358
Eclipse JDT Core.csvfanIn,fanOut,noai,nomi.csv	fanIn,fanOut,noai,nomi	4	0	0.00151014	38	0	125	0	-124.998							252	359
Eclipse PDE UI.csvfanIn,fanOut,noai,nomi.csv	fanIn,fanOut,noai,nomi	4	0	0.00128885	32	0	161	0	-160.999							253	360
Equinox Framework.csvfanIn,fanOut,noai,nomi.csv	fanIn,fanOut,noai,nomi	4	0.515152	0.00556774	24	0	22	0	-21.9944							254	361
Lucene.csvfanIn,fanOut,noai,nomi.csv	fanIn,fanOut,noai,nomi	4	0	0.00242987	10	0	84	0	-83.9976							255	362
Mylyn.csvfanIn,fanOut,noai,nomi.csv	fanIn,fanOut,noai,nomi	4	0	0.00138342	30	0	147	0	-146.999							256	363
single-version-ck-oo.csvfanIn,fanOut,noai,nomi.csv	fanIn,fanOut,noai,nomi	4	0.00378947	0.00149658	38	0	125	0	-124.999							257	364
churn.csvfanIn,fanOut,noc,noai.csv	fanIn,fanOut,noc,noai	4	0	0.00331348	28	0	47	0	-46.9967	0.0025991	7					270	365
Eclipse JDT Core.csvfanIn,fanOut,noc,noai.csv	fanIn,fanOut,noc,noai	4	0	0.00170658	38	0	112	0	-111.998							265	366
Eclipse PDE UI.csvfanIn,fanOut,noc,noai.csv	fanIn,fanOut,noc,noai	4	0	0.00184402	26	0	116	0	-115.998							266	367
Equinox Framework.csvfanIn,fanOut,noc,noai.csv	fanIn,fanOut,noc,noai	4	0.35	0.00337445	20	0	0	15	0.00337445							267	368
Lucene.csvfanIn,fanOut,noc,noai.csv	fanIn,fanOut,noc,noai	4	0	0.00410107	9	0	55	0	-54.9959							268	369
Mylyn.csvfanIn,fanOut,noc,noai.csv	fanIn,fanOut,noc,noai	4	0	0.00213556	23	0	91	0	-90.9979							269	370
single-version-ck-oo.csvnoc,fanIn,fanOut,noai.csv	fanIn,fanOut,noc,noai	4	0	0.00171858	38	0	112	0	-111.998							400	371
churn.csvfanIn,fanOut,noc,nomi.csv	fanIn,fanOut,noc,nomi	4	0	0.00345009	26	0	46	0	-45.9965	0.0267947	7					282	372
Eclipse JDT Core.csvfanIn,fanOut,noc,nomi.csv	fanIn,fanOut,noc,nomi	4	0	0.00152125	38	0	125	0	-124.998							277	373
Eclipse PDE UI.csvfanIn,fanOut,noc,nomi.csv	fanIn,fanOut,noc,nomi	4	0	0.00124177	32	0	166	0	-165.999							278	374
Equinox Framework.csvfanIn,fanOut,noc,nomi.csv	fanIn,fanOut,noc,nomi	4	0.0833333	0.176011	24	0	23	0	-22.824							279	375
Lucene.csvfanIn,fanOut,noc,nomi.csv	fanIn,fanOut,noc,nomi	4	0	0.00253686	11	0	85	0	-84.9975							280	376
Mylyn.csvfanIn,fanOut,noc,nomi.csv	fanIn,fanOut,noc,nomi	4	0	0.00128475	31	0	161	0	-160.999							281	377
single-version-ck-oo.csvnoc,fanIn,fanOut,nomi.csv	fanIn,fanOut,noc,nomi	4	0	0.00151758	38	0	125	0	-124.998							402	378
single-version-ck-oo.csvnoc,fanIn,noai,nomi.csv	fanIn,noai,noc,nomi	4	0	0.00184296	32	0	101	0	-100.998	0.00324432	7					404	379
churn.csvfanIn,noc,noai,nomi.csv	fanIn,noc,noai,nomi	4	0	0.0031612	24	0	52	0	-51.9968							316	380
Eclipse JDT Core.csvfanIn,noc,noai,nomi.csv	fanIn,noc,noai,nomi	4	0	0.00189413	32	0	101	0	-100.998							311	381
Eclipse PDE UI.csvfanIn,noc,noai,nomi.csv	fanIn,noc,noai,nomi	4	0	0.00230155	19	0	106	0	-105.998							312	382
Equinox Framework.csvfanIn,noc,noai,nomi.csv	fanIn,noc,noai,nomi	4	0.0588235	0.00744684	17	0	0	14	0.00744684							313	383
Lucene.csvfanIn,noc,noai,nomi.csv	fanIn,noc,noai,nomi	4	0	0.0039007	8	0	57	0	-56.9961							314	384
Mylyn.csvfanIn,noc,noai,nomi.csv	fanIn,noc,noai,nomi	4	0	0.00216285	16	0	93	0	-92.9978							315	385
churn.csvfanOut,noc,noai,nomi.csv	fanOut,noc,noai,nomi	4	0	0.00298252	28	0	54	0	-53.997	0.00355315	7					355	386
Eclipse JDT Core.csvfanOut,noc,noai,nomi.csv	fanOut,noc,noai,nomi	4	0	0.00175334	36	0	109	0	-108.998							350	387
Eclipse PDE UI.csvfanOut,noc,noai,nomi.csv	fanOut,noc,noai,nomi	4	0	0.00153113	25	0	136	0	-135.998							351	388
Equinox Framework.csvfanOut,noc,noai,nomi.csv	fanOut,noc,noai,nomi	4	0.238095	0.0114627	21	0	0	18	0.0114627							352	389
Lucene.csvfanOut,noc,noai,nomi.csv	fanOut,noc,noai,nomi	4	0	0.00352265	9	0	62	0	-61.9965							353	390
Mylyn.csvfanOut,noc,noai,nomi.csv	fanOut,noc,noai,nomi	4	0	0.00191298	21	0	106	0	-105.998							354	391
single-version-ck-oo.csvnoc,fanOut,noai,nomi.csv	fanOut,noc,noai,nomi	4	0	0.00170673	36	0	109	0	-108.998							408	392
eclipse34_debug.csv.cvs.csvIFANIN,noc,nomi,noai.csv	IFANIN,noc,nomi,noai	4	0	0.00291437	36	0	48	0	-47.9971	0.00270276	2					375	393
eclipse34_swt.csv.cvs.csvIFANIN,noc,nomi,noai.csv	IFANIN,noc,nomi,noai	4	0.123077	0.00249115	65	0	35	0	-34.9975							376	394
churn.csvdit,fanIn,fanOut,noai,nomi.csv	dit,fanIn,fanOut,noai,nomi	5	0	0.00255933	32	0	68	0	-67.9974	0.00236345	7					25	395
Eclipse JDT Core.csvdit,fanIn,fanOut,noai,nomi.csv	dit,fanIn,fanOut,noai,nomi	5	0	0.00147238	38	0	126	0	-125.999							19	396
Eclipse PDE UI.csvdit,fanIn,fanOut,noai,nomi.csv	dit,fanIn,fanOut,noai,nomi	5	0	0.00127141	32	0	165	0	-164.999							20	397
Equinox Framework.csvdit,fanIn,fanOut,noai,nomi.csv	dit,fanIn,fanOut,noai,nomi	5	0.655303	0.00536611	24	0	22	0	-21.9946							21	398
Lucene.csvdit,fanIn,fanOut,noai,nomi.csv	dit,fanIn,fanOut,noai,nomi	5	0	0.00307174	11	0	84	0	-83.9969							22	399
Mylyn.csvdit,fanIn,fanOut,noai,nomi.csv	dit,fanIn,fanOut,noai,nomi	5	0	0.00138364	30	0	151	0	-150.999							23	400
single-version-ck-oo.csvdit,fanIn,fanOut,noai,nomi.csv	dit,fanIn,fanOut,noai,nomi	5	0	0.00141955	38	0	126	0	-125.999							24	401
churn.csvdit,fanIn,fanOut,noc,noai.csv	dit,fanIn,fanOut,noc,noai	5	0	0.00320429	28	0	49	0	-48.9968	0.00298106	7					37	402
Eclipse JDT Core.csvdit,fanIn,fanOut,noc,noai.csv	dit,fanIn,fanOut,noc,noai	5	0	0.00159204	38	0	122	0	-121.998							32	403
Eclipse PDE UI.csvdit,fanIn,fanOut,noc,noai.csv	dit,fanIn,fanOut,noc,noai	5	0	0.00148304	30	0	143	0	-142.999							33	404
Equinox Framework.csvdit,fanIn,fanOut,noc,noai.csv	dit,fanIn,fanOut,noc,noai	5	0.380952	0.00812627	21	0	0	16	0.00812627							34	405
Lucene.csvdit,fanIn,fanOut,noc,noai.csv	dit,fanIn,fanOut,noc,noai	5	0	0.00311642	10	0	69	0	-68.9969							35	406
Mylyn.csvdit,fanIn,fanOut,noc,noai.csv	dit,fanIn,fanOut,noc,noai	5	0	0.00180375	26	0	112	0	-111.998							36	407
single-version-ck-oo.csvdit,noc,fanIn,fanOut,noai.csv	dit,fanIn,fanOut,noc,noai	5	0	0.0015416	38	0	122	0	-121.998							184	408
churn.csvdit,fanIn,fanOut,noc,nomi.csv	dit,fanIn,fanOut,noc,nomi	5	0	0.0031574	27	0	53	0	-52.9968	0.00234658	7					49	409
Eclipse JDT Core.csvdit,fanIn,fanOut,noc,nomi.csv	dit,fanIn,fanOut,noc,nomi	5	0	0.00153607	38	0	128	0	-127.998							44	410
Eclipse PDE UI.csvdit,fanIn,fanOut,noc,nomi.csv	dit,fanIn,fanOut,noc,nomi	5	0	0.00122368	33	0	171	0	-170.999							45	411
Equinox Framework.csvdit,fanIn,fanOut,noc,nomi.csv	dit,fanIn,fanOut,noc,nomi	5	0.603261	0.00531609	24	0	23	0	-22.9947							46	412
Lucene.csvdit,fanIn,fanOut,noc,nomi.csv	dit,fanIn,fanOut,noc,nomi	5	0	0.00246238	11	0	88	0	-87.9975							47	413
Mylyn.csvdit,fanIn,fanOut,noc,nomi.csv	dit,fanIn,fanOut,noc,nomi	5	0	0.00122449	31	0	166	0	-165.999							48	414
single-version-ck-oo.csvdit,noc,fanIn,fanOut,nomi.csv	dit,fanIn,fanOut,noc,nomi	5	0	0.00150597	38	0	128	0	-127.998							186	415
churn.csvdit,fanIn,noc,noai,nomi.csv	dit,fanIn,noc,noai,nomi	5	0	0.00330285	25	0	52	0	-51.9967	0.00329873	7					84	416
Eclipse JDT Core.csvdit,fanIn,noc,noai,nomi.csv	dit,fanIn,noc,noai,nomi	5	0	0.00181797	32	0	103	0	-102.998							79	417
Eclipse PDE UI.csvdit,fanIn,noc,noai,nomi.csv	dit,fanIn,noc,noai,nomi	5	0	0.0019142	20	0	112	0	-111.998							80	418
Equinox Framework.csvdit,fanIn,noc,noai,nomi.csv	dit,fanIn,noc,noai,nomi	5	0.761905	0.00857621	18	0	14	0	-13.9914							81	419
Lucene.csvdit,fanIn,noc,noai,nomi.csv	dit,fanIn,noc,noai,nomi	5	0	0.00346388	8	0	60	0	-59.9965							82	420
Mylyn.csvdit,fanIn,noc,noai,nomi.csv	dit,fanIn,noc,noai,nomi	5	0	0.00205805	18	0	101	0	-100.998							83	421
single-version-ck-oo.csvdit,noc,fanIn,noai,nomi.csv	dit,fanIn,noc,noai,nomi	5	0	0.00195796	32	0	103	0	-102.998							188	422
churn.csvdit,fanOut,noc,noai,nomi.csv	dit,fanOut,noc,noai,nomi	5	0	0.00297021	28	0	55	0	-54.997	0.00366456	7					130	423
Eclipse JDT Core.csvdit,fanOut,noc,noai,nomi.csv	dit,fanOut,noc,noai,nomi	5	0	0.00171317	36	0	110	0	-109.998							125	424
Eclipse PDE UI.csvdit,fanOut,noc,noai,nomi.csv	dit,fanOut,noc,noai,nomi	5	0	0.00146318	25	0	140	0	-139.999							126	425
Equinox Framework.csvdit,fanOut,noc,noai,nomi.csv	dit,fanOut,noc,noai,nomi	5	0.333333	0.0124753	21	0	0	18	0.0124753							127	426
Lucene.csvdit,fanOut,noc,noai,nomi.csv	dit,fanOut,noc,noai,nomi	5	0	0.00354875	9	0	64	0	-63.9965							128	427
Mylyn.csvdit,fanOut,noc,noai,nomi.csv	dit,fanOut,noc,noai,nomi	5	0	0.00183846	22	0	113	0	-112.998							129	428
single-version-ck-oo.csvdit,noc,fanOut,noai,nomi.csv	dit,fanOut,noc,noai,nomi	5	0	0.00164288	36	0	110	0	-109.998							192	429
eclipse34_debug.csv.cvs.csvdit,IFANIN,noc,nomi,noai.csv	dit,IFANIN,noc,nomi,noai	5	0	0.00217908	43	0	74	0	-73.9978	0.00191718	2					154	430
eclipse34_swt.csv.cvs.csvdit,IFANIN,noc,nomi,noai.csv	dit,IFANIN,noc,nomi,noai	5	0.231707	0.00165527	82	0	52	0	-51.9983							155	431
churn.csvfanIn,fanOut,noc,noai,nomi.csv	fanIn,fanOut,noc,noai,nomi	5	0	0.00253402	32	0	71	0	-70.9975	0.00222405	7					276	432
Eclipse JDT Core.csvfanIn,fanOut,noc,noai,nomi.csv	fanIn,fanOut,noc,noai,nomi	5	0	0.00145662	38	0	130	0	-129.999							271	433
Eclipse PDE UI.csvfanIn,fanOut,noc,noai,nomi.csv	fanIn,fanOut,noc,noai,nomi	5	0	0.00119613	33	0	173	0	-172.999							272	434
Equinox Framework.csvfanIn,fanOut,noc,noai,nomi.csv	fanIn,fanOut,noc,noai,nomi	5	0.983696	0.00525112	24	0	23	0	-22.9947							273	435
Lucene.csvfanIn,fanOut,noc,noai,nomi.csv	fanIn,fanOut,noc,noai,nomi	5	0	0.00244825	11	0	89	0	-88.9976							274	436
Mylyn.csvfanIn,fanOut,noc,noai,nomi.csv	fanIn,fanOut,noc,noai,nomi	5	0	0.00122845	31	0	165	0	-164.999							275	437
single-version-ck-oo.csvnoc,fanIn,fanOut,noai,nomi.csv	fanIn,fanOut,noc,noai,nomi	5	0	0.00145378	38	0	130	0	-129.999							401	438
churn.csvdit,fanIn,fanOut,noc,noai,nomi.csv	dit,fanIn,fanOut,noc,noai,nomi	6	0	0.0024409	32	0	71	0	-70.9976	0.00221739	7					43	439
Eclipse JDT Core.csvdit,fanIn,fanOut,noc,noai,nomi.csv	dit,fanIn,fanOut,noc,noai,nomi	6	0	0.00149514	39	0	130	0	-129.999							38	440
Eclipse PDE UI.csvdit,fanIn,fanOut,noc,noai,nomi.csv	dit,fanIn,fanOut,noc,noai,nomi	6	0	0.00118132	33	0	175	0	-174.999							39	441
Equinox Framework.csvdit,fanIn,fanOut,noc,noai,nomi.csv	dit,fanIn,fanOut,noc,noai,nomi	6	0.826389	0.00506521	24	0	24	0	-23.9949							40	442
Lucene.csvdit,fanIn,fanOut,noc,noai,nomi.csv	dit,fanIn,fanOut,noc,noai,nomi	6	0	0.00260728	11	0	90	0	-89.9974							41	443
Mylyn.csvdit,fanIn,fanOut,noc,noai,nomi.csv	dit,fanIn,fanOut,noc,noai,nomi	6	0	0.00122464	31	0	168	0	-167.999							42	444
single-version-ck-oo.csvdit,noc,fanIn,fanOut,noai,nomi.csv	dit,fanIn,fanOut,noc,noai,nomi	6	0	0.00150725	39	0	130	0	-129.998							185	445
									0		446

## Sheet: Sheet2
dataset	featuresset	n	Errors	average	count		dataset	featuresset	n	Errors	average	count	Feature set	# F	Error Rate		overall (error)
Eclipse PDE UI.csvdit,fanIn .csv	dit,fanIn	2	0.00731683	0.00918689	4		Eclipse PDE UI.csvfanIn,fanOut,noc,noai,nomi.csv	fanIn,fanOut,noc,noai,nomi	5	0.00119613	0.00171954	6	mfa	1	0.00242254		dit,ic,noc,mfa	4	0.000723343	1
single-version-ck-oo.csvdit,fanIn .csv	dit,fanIn	2	0.00851909				Eclipse PDE UI.csvdit,fanIn,fanOut,noc,noai,nomi.csv	dit,fanIn,fanOut,noc,noai,nomi	6	0.00118132	0.00174276	6	ic,mfa	2	0.00115577		ic,mfa,noc	3	0.000867884	2
Eclipse JDT Core.csvdit,fanIn .csv	dit,fanIn	2	0.0087158				Eclipse PDE UI.csvfanIn,fanOut,noai,nomi.csv	fanIn,fanOut,noai,nomi	4	0.00128885	0.0017731	6	ic,mfa,noc	3	0.000867884		ic,mfa	2	0.00115577	5
Mylyn.csvdit,fanIn .csv	dit,fanIn	2	0.0121958				Eclipse PDE UI.csvdit,fanIn,fanOut,noc,nomi.csv	dit,fanIn,fanOut,noc,nomi	5	0.00122368	0.00185166	6	dit,ic,noc,mfa	4	0.000723343		dit,fanIn,fanOut,noc,noai,nomi	6	0.00118132	6
churn.csvdit,fanIn,fanOut.csv	dit,fanIn,fanOut	3	0.00764955	0.00357951	6		Eclipse PDE UI.csvdit,fanIn,fanOut,noai,nomi.csv	dit,fanIn,fanOut,noai,nomi	5	0.00127141	0.00186301	6	fanIn,fanOut,noc,noai,nomi	5	0.00119613		fanIn,fanOut,noc,noai,nomi	5	0.00119613	7
Eclipse PDE UI.csvdit,fanIn,fanOut .csv	dit,fanIn,fanOut	3	0.00196398				Eclipse PDE UI.csvfanIn,fanOut,noc,nomi.csv	fanIn,fanOut,noc,nomi	4	0.00124177	0.00192538	6	dit,fanIn,fanOut,noc,noai,nomi	6	0.00118132		mfa	1	0.00626112	301
single-version-ck-oo.csvdit,fanIn,fanOut .csv	dit,fanIn,fanOut	3	0.0023741				Eclipse PDE UI.csvdit,fanIn,fanOut,nomi.csv	dit,fanIn,fanOut,nomi	4	0.00127442	0.00196305	6
Eclipse JDT Core.csvdit,fanIn,fanOut .csv	dit,fanIn,fanOut	3	0.00240676				Eclipse PDE UI.csvfanIn,fanOut,nomi.csv	fanIn,fanOut,nomi	3	0.00136682	0.00206454	6	Feature wise (average))				overall (average)
Mylyn.csvdit,fanIn,fanOut .csv	dit,fanIn,fanOut	3	0.00286356				Eclipse PDE UI.csvdit,fanIn,fanOut,noc,noai.csv	dit,fanIn,fanOut,noc,noai	5	0.00148304	0.00212353	6	mfa	1	0.0073134		fanIn,fanOut,noc,noai,nomi	5	0.00171954	1
Lucene.csvdit,fanIn,fanOut .csv	dit,fanIn,fanOut	3	0.0042191				Eclipse PDE UI.csvdit,fanOut,noc,noai,nomi.csv	dit,fanOut,noc,noai,nomi	5	0.00146318	0.00219611	6	ic,mfa	2	0.00315411		dit,fanIn,fanOut,noc,noai,nomi	6	0.00174276	2
Eclipse PDE UI.csvdit,fanIn,fanOut,noai.csv	dit,fanIn,fanOut,noai	4	0.00159019	0.00244551	6		Eclipse PDE UI.csvfanOut,noc,noai,nomi.csv	fanOut,noc,noai,nomi	4	0.00153113	0.00223489	6	fanIn,fanOut,nomi	3	0.00206454		fanIn,fanOut,noai,nomi	4	0.0017731	3
Eclipse JDT Core.csvdit,fanIn,fanOut,noai.csv	dit,fanIn,fanOut,noai	4	0.00160792				Eclipse JDT Core.csvdit,fanIn,noc,noai,nomi.csv	dit,fanIn,noc,noai,nomi	5	0.00181797	0.00241915	6	fanIn,fanOut,noai,nomi	4	0.0017731		fanIn,fanOut,nomi	3	0.00206454	10
single-version-ck-oo.csvdit,fanIn,fanOut,noai.csv	dit,fanIn,fanOut,noai	4	0.0016641				Eclipse PDE UI.csvdit,fanIn,fanOut,noai.csv	dit,fanIn,fanOut,noai	4	0.00159019	0.00244551	6	fanIn,fanOut,noc,noai,nomi	5	0.00171954		ic,mfa	2	0.00315411	31
Mylyn.csvdit,fanIn,fanOut,noai.csv	dit,fanIn,fanOut,noai	4	0.00216175				Eclipse JDT Core.csvfanIn,fanOut,noc,noai.csv	fanIn,fanOut,noc,noai	4	0.00170658	0.00246988	6	dit,fanIn,fanOut,noc,noai,nomi	6	0.00174276		mfa	1	0.0073134	60
churn.csvdit,fanIn,fanOut,noai.csv	dit,fanIn,fanOut,noai	4	0.00356159				Eclipse PDE UI.csvdit,fanOut,noai,nomi.csv	dit,fanOut,noai,nomi	4	0.00163413	0.00248353	6
Lucene.csvdit,fanIn,fanOut,noai.csv	dit,fanIn,fanOut,noai	4	0.00408753				single-version-ck-oo.csvnoc,fanIn,noai,nomi.csv	fanIn,noc,noai,nomi	4	0.00184296	0.0025439	6
Eclipse PDE UI.csvdit,fanIn,fanOut,noai,nomi.csv	dit,fanIn,fanOut,noai,nomi	5	0.00127141	0.00186301	6		Eclipse PDE UI.csvdit,fanOut,noc,nomi.csv	dit,fanOut,noc,nomi	4	0.00159184	0.00254432	6
Mylyn.csvdit,fanIn,fanOut,noai,nomi.csv	dit,fanIn,fanOut,noai,nomi	5	0.00138364				Eclipse PDE UI.csvfanOut,noai,nomi.csv	fanOut,noai,nomi	3	0.00176832	0.00262785	6
single-version-ck-oo.csvdit,fanIn,fanOut,noai,nomi.csv	dit,fanIn,fanOut,noai,nomi	5	0.00141955				single-version-ck-oo.csvdit,fanIn,noai,nomi.csv	dit,fanIn,noai,nomi	4	0.00199035	0.00269927	6
Eclipse JDT Core.csvdit,fanIn,fanOut,noai,nomi.csv	dit,fanIn,fanOut,noai,nomi	5	0.00147238				Eclipse PDE UI.csvfanOut,noc,nomi.csv	fanOut,noc,nomi	3	0.00172567	0.00278399	6
churn.csvdit,fanIn,fanOut,noai,nomi.csv	dit,fanIn,fanOut,noai,nomi	5	0.00255933				prop-1.csvdit,noc,mfa,ic.csv	dit,ic,noc,mfa	4	0.000723343	0.002785	3
Lucene.csvdit,fanIn,fanOut,noai,nomi.csv	dit,fanIn,fanOut,noai,nomi	5	0.00307174				Eclipse JDT Core.csvfanIn,fanOut,noai.csv	fanIn,fanOut,noai	3	0.00177765	0.00283755	6
single-version-ck-oo.csvdit,noc,fanIn,fanOut .csv	dit,fanIn,fanOut,noc	4	0.0021071	0.0029093	6		single-version-ck-oo.csvfanIn,noai,nomi.csv	fanIn,noai,nomi	3	0.0020554	0.00284468	6
churn.csvdit,fanIn,fanOut,noc.csv	dit,fanIn,fanOut,noc	4	0.00575723				Eclipse JDT Core.csvdit,fanIn,noc,nomi.csv	dit,fanIn,noc,nomi	4	0.00202118	0.00284964	6
Eclipse PDE UI.csvdit,fanIn,fanOut,noc .csv	dit,fanIn,fanOut,noc	4	0.00169165				single-version-ck-oo.csvdit,noc,fanIn,fanOut .csv	dit,fanIn,fanOut,noc	4	0.0021071	0.0029093	6
Eclipse JDT Core.csvdit,fanIn,fanOut,noc .csv	dit,fanIn,fanOut,noc	4	0.00210728				prop-1.csvnoc,mfa,ic.csv	ic,mfa,noc	3	0.000867884	0.00293757	3
Mylyn.csvdit,fanIn,fanOut,noc .csv	dit,fanIn,fanOut,noc	4	0.00225967				prop-1.csvdit,noc,mfa.csv	dit,mfa,noc	3	0.00088743	0.00302346	3
Lucene.csvdit,fanIn,fanOut,noc .csv	dit,fanIn,fanOut,noc	4	0.00353287				Eclipse PDE UI.csvdit,fanOut,nomi.csv	dit,fanOut,nomi	3	0.00182221	0.00311815	6
Eclipse PDE UI.csvdit,fanIn,fanOut,noc,noai.csv	dit,fanIn,fanOut,noc,noai	5	0.00148304	0.00212353	6		prop-1.csvmfa,ic.csv	ic,mfa	2	0.00115577	0.00315411	3
single-version-ck-oo.csvdit,noc,fanIn,fanOut,noai.csv	dit,fanIn,fanOut,noc,noai	5	0.0015416				eclipse34_swt.csv.cvs.csvdit,noc,nomi,noai.csv	dit,noc,noai,nomi	4	0.00161777	0.00330512	8
Eclipse JDT Core.csvdit,fanIn,fanOut,noc,noai.csv	dit,fanIn,fanOut,noc,noai	5	0.00159204				Eclipse JDT Core.csvdit,fanOut,noc,noai.csv	dit,fanOut,noc,noai	4	0.00193526	0.0033338	6
Mylyn.csvdit,fanIn,fanOut,noc,noai.csv	dit,fanIn,fanOut,noc,noai	5	0.00180375				single-version-ck-oo.csvnoc,fanIn,nomi.csv	fanIn,noc,nomi	3	0.0023253	0.00338544	6
Lucene.csvdit,fanIn,fanOut,noc,noai.csv	dit,fanIn,fanOut,noc,noai	5	0.00311642				prop-1.csvnoc,mfa.csv	noc,mfa	2	0.00123457	0.00340906	3
churn.csvdit,fanIn,fanOut,noc,noai.csv	dit,fanIn,fanOut,noc,noai	5	0.00320429				prop-1.csvdit,mfa.csv	dit,mfa	2	0.00125003	0.00342226	3
Eclipse PDE UI.csvdit,fanIn,fanOut,noc,noai,nomi.csv	dit,fanIn,fanOut,noc,noai,nomi	6	0.00118132	0.00174276	6		Eclipse JDT Core.csvdit,fanIn,nomi.csv	dit,fanIn,nomi	3	0.00234283	0.00349319	6
Mylyn.csvdit,fanIn,fanOut,noc,noai,nomi.csv	dit,fanIn,fanOut,noc,noai,nomi	6	0.00122464				churn.csvdit,fanIn,fanOut.csv	dit,fanIn,fanOut	3	0.00764955	0.00357951	6
Eclipse JDT Core.csvdit,fanIn,fanOut,noc,noai,nomi.csv	dit,fanIn,fanOut,noc,noai,nomi	6	0.00149514				Eclipse PDE UI.csvfanOut,nomi.csv	fanOut,nomi	2	0.00212879	0.00358918	6
single-version-ck-oo.csvdit,noc,fanIn,fanOut,noai,nomi.csv	dit,fanIn,fanOut,noc,noai,nomi	6	0.00150725				Eclipse JDT Core.csvdit,fanIn,noc,noai.csv	dit,fanIn,noc,noai	4	0.00218169	0.00375739	6
churn.csvdit,fanIn,fanOut,noc,noai,nomi.csv	dit,fanIn,fanOut,noc,noai,nomi	6	0.0024409				Eclipse JDT Core.csvdit,fanOut,noai.csv	dit,fanOut,noai	3	0.00217649	0.00404599	6
Lucene.csvdit,fanIn,fanOut,noc,noai,nomi.csv	dit,fanIn,fanOut,noc,noai,nomi	6	0.00260728				eclipse34_swt.csv.cvs.csvnoc,nomi,noai.csv	noc,noai,nomi	3	0.00267973	0.0040526	8
Eclipse PDE UI.csvdit,fanIn,fanOut,noc,nomi.csv	dit,fanIn,fanOut,noc,nomi	5	0.00122368	0.00185166	6		churn.csvfanIn,fanOut,noc.csv	fanIn,fanOut,noc	3	0.00727292	0.00409759	6
Mylyn.csvdit,fanIn,fanOut,noc,nomi.csv	dit,fanIn,fanOut,noc,nomi	5	0.00122449				Eclipse JDT Core.csvfanOut,noc,noai.csv	fanOut,noc,noai	3	0.00211354	0.00416503	6
single-version-ck-oo.csvdit,noc,fanIn,fanOut,nomi.csv	dit,fanIn,fanOut,noc,nomi	5	0.00150597				single-version-ck-oo.csvfanIn,nomi.csv	fanIn,nomi	2	0.00280575	0.00422964	6
Eclipse JDT Core.csvdit,fanIn,fanOut,noc,nomi.csv	dit,fanIn,fanOut,noc,nomi	5	0.00153607				eclipse34_swt.csv.cvs.csvdit,nomi,noai.csv	dit,noai,nomi	3	0.00241281	0.00435103	8
Lucene.csvdit,fanIn,fanOut,noc,nomi.csv	dit,fanIn,fanOut,noc,nomi	5	0.00246238				single-version-ck-oo.csvfanOut,noai.csv	fanOut,noai	2	0.0026744	0.00469632	5
churn.csvdit,fanIn,fanOut,noc,nomi.csv	dit,fanIn,fanOut,noc,nomi	5	0.0031574				Eclipse JDT Core.csvfanIn,noc,noai.csv	fanIn,noc,noai	3	0.00249201	0.00488576	6
Eclipse PDE UI.csvdit,fanIn,fanOut,nomi.csv	dit,fanIn,fanOut,nomi	4	0.00127442	0.00196305	6		eclipse34_swt.csv.cvs.csvdit,noc,nomi.csv	dit,noc,nomi	3	0.00264397	0.00494883	8
Mylyn.csvdit,fanIn,fanOut,nomi.csv	dit,fanIn,fanOut,nomi	4	0.00138565				single-version-ck-oo.csvdit,noc,fanOut .csv	dit,fanOut,noc	3	0.00348926	0.00503183	5
Eclipse JDT Core.csvdit,fanIn,fanOut,nomi.csv	dit,fanIn,fanOut,nomi	4	0.00152808				single-version-ck-oo.csvdit,fanIn,noai.csv	dit,fanIn,noai	3	0.00251571	0.00512564	6
single-version-ck-oo.csvdit,fanIn,fanOut,nomi.csv	dit,fanIn,fanOut,nomi	4	0.00154468				churn.csvfanIn,fanOut.csv	fanIn,fanOut	2	0.00900952	0.00561082	6
Lucene.csvdit,fanIn,fanOut,nomi.csv	dit,fanIn,fanOut,nomi	4	0.00271662				single-version-ck-oo.csvnoc,nomi.csv	noc,nomi	2	0.00447439	0.00580577	7
churn.csvdit,fanIn,fanOut,nomi.csv	dit,fanIn,fanOut,nomi	4	0.00332883				Eclipse PDE UI.csvdit,fanIn,noc .csv	dit,fanIn,noc	3	0.00447561	0.0059048	5
single-version-ck-oo.csvdit,fanIn,noai.csv	dit,fanIn,noai	3	0.00251571	0.00512564	6		single-version-ck-oo.csvnoai,nomi.csv	noai,nomi	2	0.00351251	0.00600452	8
Eclipse JDT Core.csvdit,fanIn,noai.csv	dit,fanIn,noai	3	0.00276794				prop-1.csvdit,mfa,ic.csv	dit,ic,mfa	3	0.000883099	0.00612631	4
Eclipse PDE UI.csvdit,fanIn,noai.csv	dit,fanIn,noai	3	0.00379972				single-version-ck-oo.csvdit,noc,noai.csv	dit,noc,noai	3	0.0034019	0.00620535	7
churn.csvdit,fanIn,noai.csv	dit,fanIn,noai	3	0.00590564				eclipse34_swt.csv.cvs.csvdit,nomi.csv	dit,nomi	2	0.00407756	0.00660643	6
Mylyn.csvdit,fanIn,noai.csv	dit,fanIn,noai	3	0.00717157				Eclipse JDT Core.csvfanIn,noai.csv	fanIn,noai	2	0.00322636	0.0067331	6
Lucene.csvdit,fanIn,noai.csv	dit,fanIn,noai	3	0.00859325				prop-1.csvmfa.csv	mfa	1	0.00242254	0.0073134	3
single-version-ck-oo.csvdit,fanIn,noai,nomi.csv	dit,fanIn,noai,nomi	4	0.00199035	0.00269927	6		single-version-ck-oo.csvnoc,fanOut .csv	fanOut,noc	2	0.00710003	0.00753571	4
Eclipse JDT Core.csvdit,fanIn,noai,nomi.csv	dit,fanIn,noai,nomi	4	0.00199408				single-version-ck-oo.csvnoc,noai.csv	noc,noai	2	0.00479158	0.00780015	5
Eclipse PDE UI.csvdit,fanIn,noai,nomi.csv	dit,fanIn,noai,nomi	4	0.00243205				Eclipse JDT Core.csvdit,fanOut .csv	dit,fanOut	2	0.00660297	0.00784048	4
Mylyn.csvdit,fanIn,noai,nomi.csv	dit,fanIn,noai,nomi	4	0.00251716				single-version-ck-oo.csvdit,noai.csv	dit,noai	2	0.0050435	0.00825749	5
churn.csvdit,fanIn,noai,nomi.csv	dit,fanIn,noai,nomi	4	0.0034349				single-version-ck-oo.csvnomi.csv	nomi	1	0.00789442	0.00850767	3
Lucene.csvdit,fanIn,noai,nomi.csv	dit,fanIn,noai,nomi	4	0.00382706				single-version-ck-oo.csvnoc,fanIn .csv	fanIn,noc	2	0.00828675	0.00880742	4
Eclipse PDE UI.csvdit,fanIn,noc .csv	dit,fanIn,noc	3	0.00447561	0.0059048	5		single-version-ck-oo.csvnoai.csv	noai	1	0.0089486	0.00915982	2
single-version-ck-oo.csvdit,noc,fanIn .csv	dit,fanIn,noc	3	0.00468144				Eclipse PDE UI.csvdit,fanIn .csv	dit,fanIn	2	0.00731683	0.00918689	4
Eclipse JDT Core.csvdit,fanIn,noc .csv	dit,fanIn,noc	3	0.00468322				prop-1.csvdit,noc.csv	dit,noc	2	0.0102983	0.0109257	2
Mylyn.csvdit,fanIn,noc .csv	dit,fanIn,noc	3	0.00657253				Mylyn.csvdit,fanIn,fanOut,noc,nomi.csv	dit,fanIn,fanOut,noc,nomi	5	0.00122449
Lucene.csvdit,fanIn,noc .csv	dit,fanIn,noc	3	0.00911119				Mylyn.csvdit,fanIn,fanOut,noc,noai,nomi.csv	dit,fanIn,fanOut,noc,noai,nomi	6	0.00122464
Eclipse JDT Core.csvdit,fanIn,noc,noai.csv	dit,fanIn,noc,noai	4	0.00218169	0.00375739	6		Mylyn.csvfanIn,fanOut,noc,noai,nomi.csv	fanIn,fanOut,noc,noai,nomi	5	0.00122845
single-version-ck-oo.csvdit,noc,fanIn,noai.csv	dit,fanIn,noc,noai	4	0.00240445				Mylyn.csvfanIn,fanOut,noc,nomi.csv	fanIn,fanOut,noc,nomi	4	0.00128475
Eclipse PDE UI.csvdit,fanIn,noc,noai.csv	dit,fanIn,noc,noai	4	0.00351264				Mylyn.csvfanIn,fanOut,noai,nomi.csv	fanIn,fanOut,noai,nomi	4	0.00138342
Mylyn.csvdit,fanIn,noc,noai.csv	dit,fanIn,noc,noai	4	0.00380498				Mylyn.csvdit,fanIn,fanOut,noai,nomi.csv	dit,fanIn,fanOut,noai,nomi	5	0.00138364
churn.csvdit,fanIn,noc,noai.csv	dit,fanIn,noc,noai	4	0.00485885				Mylyn.csvdit,fanIn,fanOut,nomi.csv	dit,fanIn,fanOut,nomi	4	0.00138565
Lucene.csvdit,fanIn,noc,noai.csv	dit,fanIn,noc,noai	4	0.00578172				single-version-ck-oo.csvdit,fanIn,fanOut,noai,nomi.csv	dit,fanIn,fanOut,noai,nomi	5	0.00141955
Eclipse JDT Core.csvdit,fanIn,noc,noai,nomi.csv	dit,fanIn,noc,noai,nomi	5	0.00181797	0.00241915	6		Mylyn.csvfanIn,fanOut,nomi.csv	fanIn,fanOut,nomi	3	0.00144258
Eclipse PDE UI.csvdit,fanIn,noc,noai,nomi.csv	dit,fanIn,noc,noai,nomi	5	0.0019142				single-version-ck-oo.csvnoc,fanIn,fanOut,noai,nomi.csv	fanIn,fanOut,noc,noai,nomi	5	0.00145378
single-version-ck-oo.csvdit,noc,fanIn,noai,nomi.csv	dit,fanIn,noc,noai,nomi	5	0.00195796				Eclipse JDT Core.csvfanIn,fanOut,noc,noai,nomi.csv	fanIn,fanOut,noc,noai,nomi	5	0.00145662
Mylyn.csvdit,fanIn,noc,noai,nomi.csv	dit,fanIn,noc,noai,nomi	5	0.00205805				Eclipse JDT Core.csvdit,fanIn,fanOut,noai,nomi.csv	dit,fanIn,fanOut,noai,nomi	5	0.00147238
churn.csvdit,fanIn,noc,noai,nomi.csv	dit,fanIn,noc,noai,nomi	5	0.00330285				Eclipse JDT Core.csvdit,fanIn,fanOut,noc,noai,nomi.csv	dit,fanIn,fanOut,noc,noai,nomi	6	0.00149514
Lucene.csvdit,fanIn,noc,noai,nomi.csv	dit,fanIn,noc,noai,nomi	5	0.00346388				single-version-ck-oo.csvfanIn,fanOut,noai,nomi.csv	fanIn,fanOut,noai,nomi	4	0.00149658
Eclipse JDT Core.csvdit,fanIn,noc,nomi.csv	dit,fanIn,noc,nomi	4	0.00202118	0.00284964	6		single-version-ck-oo.csvdit,noc,fanIn,fanOut,nomi.csv	dit,fanIn,fanOut,noc,nomi	5	0.00150597
Eclipse PDE UI.csvdit,fanIn,noc,nomi.csv	dit,fanIn,noc,nomi	4	0.00213714				single-version-ck-oo.csvdit,noc,fanIn,fanOut,noai,nomi.csv	dit,fanIn,fanOut,noc,noai,nomi	6	0.00150725
single-version-ck-oo.csvdit,noc,fanIn,nomi.csv	dit,fanIn,noc,nomi	4	0.002141				Eclipse JDT Core.csvfanIn,fanOut,noai,nomi.csv	fanIn,fanOut,noai,nomi	4	0.00151014
Mylyn.csvdit,fanIn,noc,nomi.csv	dit,fanIn,noc,nomi	4	0.00220211				single-version-ck-oo.csvnoc,fanIn,fanOut,nomi.csv	fanIn,fanOut,noc,nomi	4	0.00151758
Lucene.csvdit,fanIn,noc,nomi.csv	dit,fanIn,noc,nomi	4	0.00358439				Eclipse JDT Core.csvfanIn,fanOut,noc,nomi.csv	fanIn,fanOut,noc,nomi	4	0.00152125
churn.csvdit,fanIn,noc,nomi.csv	dit,fanIn,noc,nomi	4	0.00501199				Eclipse JDT Core.csvdit,fanIn,fanOut,nomi.csv	dit,fanIn,fanOut,nomi	4	0.00152808
Eclipse JDT Core.csvdit,fanIn,nomi.csv	dit,fanIn,nomi	3	0.00234283	0.00349319	6		Eclipse JDT Core.csvdit,fanIn,fanOut,noc,nomi.csv	dit,fanIn,fanOut,noc,nomi	5	0.00153607
single-version-ck-oo.csvdit,fanIn,nomi.csv	dit,fanIn,nomi	3	0.00234645				single-version-ck-oo.csvdit,noc,fanIn,fanOut,noai.csv	dit,fanIn,fanOut,noc,noai	5	0.0015416
Eclipse PDE UI.csvdit,fanIn,nomi.csv	dit,fanIn,nomi	3	0.00247495				single-version-ck-oo.csvdit,fanIn,fanOut,nomi.csv	dit,fanIn,fanOut,nomi	4	0.00154468
Mylyn.csvdit,fanIn,nomi.csv	dit,fanIn,nomi	3	0.00270589				single-version-ck-oo.csvfanIn,fanOut,nomi.csv	fanIn,fanOut,nomi	3	0.00158605
Lucene.csvdit,fanIn,nomi.csv	dit,fanIn,nomi	3	0.0047791				Eclipse JDT Core.csvdit,fanIn,fanOut,noc,noai.csv	dit,fanIn,fanOut,noc,noai	5	0.00159204
churn.csvdit,fanIn,nomi.csv	dit,fanIn,nomi	3	0.00630993				Eclipse JDT Core.csvdit,fanIn,fanOut,noai.csv	dit,fanIn,fanOut,noai	4	0.00160792
Eclipse JDT Core.csvdit,fanOut .csv	dit,fanOut	2	0.00660297	0.00784048	4		single-version-ck-oo.csvdit,noc,fanOut,noai,nomi.csv	dit,fanOut,noc,noai,nomi	5	0.00164288
single-version-ck-oo.csvdit,fanOut .csv	dit,fanOut	2	0.00684173				single-version-ck-oo.csvdit,fanIn,fanOut,noai.csv	dit,fanIn,fanOut,noai	4	0.0016641
Eclipse PDE UI.csvdit,fanOut .csv	dit,fanOut	2	0.00725111				Eclipse PDE UI.csvdit,fanIn,fanOut,noc .csv	dit,fanIn,fanOut,noc	4	0.00169165
Mylyn.csvdit,fanOut .csv	dit,fanOut	2	0.0106661				single-version-ck-oo.csvnoc,fanOut,noai,nomi.csv	fanOut,noc,noai,nomi	4	0.00170673
Eclipse JDT Core.csvdit,fanOut,noai.csv	dit,fanOut,noai	3	0.00217649	0.00404599	6		Eclipse JDT Core.csvdit,fanOut,noc,noai,nomi.csv	dit,fanOut,noc,noai,nomi	5	0.00171317
single-version-ck-oo.csvdit,fanOut,noai.csv	dit,fanOut,noai	3	0.00220657				Eclipse JDT Core.csvfanIn,fanOut,nomi.csv	fanIn,fanOut,nomi	3	0.00171658
Eclipse PDE UI.csvdit,fanOut,noai.csv	dit,fanOut,noai	3	0.0027828				single-version-ck-oo.csvnoc,fanIn,fanOut,noai.csv	fanIn,fanOut,noc,noai	4	0.00171858
Mylyn.csvdit,fanOut,noai.csv	dit,fanOut,noai	3	0.00511156				Eclipse JDT Core.csvfanOut,noc,noai,nomi.csv	fanOut,noc,noai,nomi	4	0.00175334
churn.csvdit,fanOut,noai.csv	dit,fanOut,noai	3	0.00536441				Eclipse JDT Core.csvdit,fanOut,noc,nomi.csv	dit,fanOut,noc,nomi	4	0.00179366
Lucene.csvdit,fanOut,noai.csv	dit,fanOut,noai	3	0.0066341				single-version-ck-oo.csvdit,noc,fanOut,nomi.csv	dit,fanOut,noc,nomi	4	0.00180079
Eclipse PDE UI.csvdit,fanOut,noai,nomi.csv	dit,fanOut,noai,nomi	4	0.00163413	0.00248353	6		Mylyn.csvdit,fanIn,fanOut,noc,noai.csv	dit,fanIn,fanOut,noc,noai	5	0.00180375
Eclipse JDT Core.csvdit,fanOut,noai,nomi.csv	dit,fanOut,noai,nomi	4	0.00195315				Mylyn.csvdit,fanOut,noc,noai,nomi.csv	dit,fanOut,noc,noai,nomi	5	0.00183846
single-version-ck-oo.csvdit,fanOut,noai,nomi.csv	dit,fanOut,noai,nomi	4	0.00200512				Eclipse PDE UI.csvfanIn,fanOut,noc,noai.csv	fanIn,fanOut,noc,noai	4	0.00184402
Mylyn.csvdit,fanOut,noai,nomi.csv	dit,fanOut,noai,nomi	4	0.00216204				single-version-ck-oo.csvnoc,fanOut,nomi.csv	fanOut,noc,nomi	3	0.00184458
churn.csvdit,fanOut,noai,nomi.csv	dit,fanOut,noai,nomi	4	0.00326032				Eclipse JDT Core.csvfanOut,noc,nomi.csv	fanOut,noc,nomi	3	0.00184683
Lucene.csvdit,fanOut,noai,nomi.csv	dit,fanOut,noai,nomi	4	0.00388639				single-version-ck-oo.csvfanOut,noai,nomi.csv	fanOut,noai,nomi	3	0.00185824
single-version-ck-oo.csvdit,noc,fanOut .csv	dit,fanOut,noc	3	0.00348926	0.00503183	5		Eclipse JDT Core.csvfanOut,noai,nomi.csv	fanOut,noai,nomi	3	0.00186115
Eclipse JDT Core.csvdit,fanOut,noc .csv	dit,fanOut,noc	3	0.00357744				Eclipse JDT Core.csvfanIn,noc,noai,nomi.csv	fanIn,noc,noai,nomi	4	0.00189413
Eclipse PDE UI.csvdit,fanOut,noc .csv	dit,fanOut,noc	3	0.00361542				Mylyn.csvdit,fanOut,noc,nomi.csv	dit,fanOut,noc,nomi	4	0.00189868
Mylyn.csvdit,fanOut,noc .csv	dit,fanOut,noc	3	0.00534933				single-version-ck-oo.csvfanIn,fanOut,noai.csv	fanIn,fanOut,noai	3	0.00190392
Lucene.csvdit,fanOut,noc .csv	dit,fanOut,noc	3	0.00912773				Mylyn.csvfanOut,noc,noai,nomi.csv	fanOut,noc,noai,nomi	4	0.00191298
Eclipse JDT Core.csvdit,fanOut,noc,noai.csv	dit,fanOut,noc,noai	4	0.00193526	0.0033338	6		Eclipse PDE UI.csvdit,fanIn,noc,noai,nomi.csv	dit,fanIn,noc,noai,nomi	5	0.0019142
single-version-ck-oo.csvdit,noc,fanOut,noai.csv	dit,fanOut,noc,noai	4	0.00197782				Eclipse JDT Core.csvdit,fanOut,noai,nomi.csv	dit,fanOut,noai,nomi	4	0.00195315
Eclipse PDE UI.csvdit,fanOut,noc,noai.csv	dit,fanOut,noc,noai	4	0.00208529				single-version-ck-oo.csvdit,noc,fanIn,noai,nomi.csv	dit,fanIn,noc,noai,nomi	5	0.00195796
Mylyn.csvdit,fanOut,noc,noai.csv	dit,fanOut,noc,noai	4	0.00364166				Eclipse PDE UI.csvdit,fanIn,fanOut .csv	dit,fanIn,fanOut	3	0.00196398
churn.csvdit,fanOut,noc,noai.csv	dit,fanOut,noc,noai	4	0.00461617				single-version-ck-oo.csvdit,noc,fanOut,noai.csv	dit,fanOut,noc,noai	4	0.00197782
Lucene.csvdit,fanOut,noc,noai.csv	dit,fanOut,noc,noai	4	0.00574662				Eclipse JDT Core.csvdit,fanIn,noai,nomi.csv	dit,fanIn,noai,nomi	4	0.00199408
Eclipse PDE UI.csvdit,fanOut,noc,noai,nomi.csv	dit,fanOut,noc,noai,nomi	5	0.00146318	0.00219611	6		single-version-ck-oo.csvdit,fanOut,noai,nomi.csv	dit,fanOut,noai,nomi	4	0.00200512
single-version-ck-oo.csvdit,noc,fanOut,noai,nomi.csv	dit,fanOut,noc,noai,nomi	5	0.00164288				Eclipse JDT Core.csvdit,fanOut,nomi.csv	dit,fanOut,nomi	3	0.00202528
Eclipse JDT Core.csvdit,fanOut,noc,noai,nomi.csv	dit,fanOut,noc,noai,nomi	5	0.00171317				Mylyn.csvdit,fanIn,noc,noai,nomi.csv	dit,fanIn,noc,noai,nomi	5	0.00205805
Mylyn.csvdit,fanOut,noc,noai,nomi.csv	dit,fanOut,noc,noai,nomi	5	0.00183846				Eclipse JDT Core.csvfanIn,noai,nomi.csv	fanIn,noai,nomi	3	0.00206145
churn.csvdit,fanOut,noc,noai,nomi.csv	dit,fanOut,noc,noai,nomi	5	0.00297021				Eclipse PDE UI.csvdit,fanOut,noc,noai.csv	dit,fanOut,noc,noai	4	0.00208529
Lucene.csvdit,fanOut,noc,noai,nomi.csv	dit,fanOut,noc,noai,nomi	5	0.00354875				single-version-ck-oo.csvdit,fanOut,nomi.csv	dit,fanOut,nomi	3	0.00209782
Eclipse PDE UI.csvdit,fanOut,noc,nomi.csv	dit,fanOut,noc,nomi	4	0.00159184	0.00254432	6		Eclipse JDT Core.csvdit,fanIn,fanOut,noc .csv	dit,fanIn,fanOut,noc	4	0.00210728
Eclipse JDT Core.csvdit,fanOut,noc,nomi.csv	dit,fanOut,noc,nomi	4	0.00179366				Mylyn.csvfanOut,noc,nomi.csv	fanOut,noc,nomi	3	0.00211298
single-version-ck-oo.csvdit,noc,fanOut,nomi.csv	dit,fanOut,noc,nomi	4	0.00180079				Mylyn.csvfanIn,fanOut,noc,noai.csv	fanIn,fanOut,noc,noai	4	0.00213556
Mylyn.csvdit,fanOut,noc,nomi.csv	dit,fanOut,noc,nomi	4	0.00189868				Eclipse PDE UI.csvdit,fanIn,noc,nomi.csv	dit,fanIn,noc,nomi	4	0.00213714
Lucene.csvdit,fanOut,noc,nomi.csv	dit,fanOut,noc,nomi	4	0.00330651				single-version-ck-oo.csvdit,noc,fanIn,nomi.csv	dit,fanIn,noc,nomi	4	0.002141
churn.csvdit,fanOut,noc,nomi.csv	dit,fanOut,noc,nomi	4	0.00487442				Mylyn.csvdit,fanIn,fanOut,noai.csv	dit,fanIn,fanOut,noai	4	0.00216175
Eclipse PDE UI.csvdit,fanOut,nomi.csv	dit,fanOut,nomi	3	0.00182221	0.00311815	6		Mylyn.csvdit,fanOut,noai,nomi.csv	dit,fanOut,noai,nomi	4	0.00216204
Eclipse JDT Core.csvdit,fanOut,nomi.csv	dit,fanOut,nomi	3	0.00202528				Mylyn.csvfanIn,noc,noai,nomi.csv	fanIn,noc,noai,nomi	4	0.00216285
single-version-ck-oo.csvdit,fanOut,nomi.csv	dit,fanOut,nomi	3	0.00209782				Eclipse PDE UI.csvfanIn,fanOut,noai.csv	fanIn,fanOut,noai	3	0.00218404
Mylyn.csvdit,fanOut,nomi.csv	dit,fanOut,nomi	3	0.0023737				Eclipse JDT Core.csvfanOut,nomi.csv	fanOut,nomi	2	0.00218486
Lucene.csvdit,fanOut,nomi.csv	dit,fanOut,nomi	3	0.00508911				single-version-ck-oo.csvfanOut,nomi.csv	fanOut,nomi	2	0.00218573
churn.csvdit,fanOut,nomi.csv	dit,fanOut,nomi	3	0.0053008				Mylyn.csvdit,fanIn,noc,nomi.csv	dit,fanIn,noc,nomi	4	0.00220211
prop-1.csvdit,mfa,ic.csv	dit,ic,mfa	3	0.000883099	0.00612631	4		single-version-ck-oo.csvnoc,fanOut,noai.csv	fanOut,noc,noai	3	0.00220302
xalan-2.4.csvdit,mfa,ic.csv	dit,ic,mfa	3	0.0039436				single-version-ck-oo.csvdit,fanOut,noai.csv	dit,fanOut,noai	3	0.00220657
prop-1.csvdit,noc,ic.csv	dit,ic,mfa	3	0.00709153				Mylyn.csvdit,fanIn,fanOut,noc .csv	dit,fanIn,fanOut,noc	4	0.00225967
ant-1.7.csvdit,ic,mfa.csv	dit,ic,mfa	3	0.012587				Eclipse PDE UI.csvfanIn,noc,noai,nomi.csv	fanIn,noc,noai,nomi	4	0.00230155
prop-1.csvdit,noc,mfa,ic.csv	dit,ic,noc,mfa	4	0.000723343	0.002785	3		single-version-ck-oo.csvdit,fanIn,nomi.csv	dit,fanIn,nomi	3	0.00234645
ant-1.7.csvdit,noc,ic,mfa.csv	dit,ic,noc,mfa	4	0.00353392				Mylyn.csvfanOut,noai,nomi.csv	fanOut,noai,nomi	3	0.00236799
xalan-2.4.csvdit,noc,mfa,ic.csv	dit,ic,noc,mfa	4	0.00409775				Mylyn.csvdit,fanOut,nomi.csv	dit,fanOut,nomi	3	0.0023737
prop-1.csvdit,mfa.csv	dit,mfa	2	0.00125003	0.00342226	3		single-version-ck-oo.csvdit,fanIn,fanOut .csv	dit,fanIn,fanOut	3	0.0023741
ant-1.7.csvdit,mfa.csv	dit,mfa	2	0.00428327				single-version-ck-oo.csvdit,noc,fanIn,noai.csv	dit,fanIn,noc,noai	4	0.00240445
xalan-2.4.csvdit,mfa.csv	dit,mfa	2	0.00473347				Eclipse JDT Core.csvdit,fanIn,fanOut .csv	dit,fanIn,fanOut	3	0.00240676
prop-1.csvdit,noc,mfa.csv	dit,mfa,noc	3	0.00088743	0.00302346	3		Lucene.csvfanIn,fanOut,noai,nomi.csv	fanIn,fanOut,noai,nomi	4	0.00242987
ant-1.7.csvdit,noc,mfa.csv	dit,mfa,noc	3	0.00367126				Eclipse PDE UI.csvdit,fanIn,noai,nomi.csv	dit,fanIn,noai,nomi	4	0.00243205
xalan-2.4.csvdit,noc,mfa.csv	dit,mfa,noc	3	0.00451171				churn.csvdit,fanIn,fanOut,noc,noai,nomi.csv	dit,fanIn,fanOut,noc,noai,nomi	6	0.0024409
single-version-ck-oo.csvdit,noai.csv	dit,noai	2	0.0050435	0.00825749	5		eclipse34_debug.csv.cvs.csvdit,noc,nomi,noai.csv	dit,noc,noai,nomi	4	0.00244129
Eclipse JDT Core.csvdit,noai.csv	dit,noai	2	0.00508698				Lucene.csvfanIn,fanOut,noc,noai,nomi.csv	fanIn,fanOut,noc,noai,nomi	5	0.00244825
eclipse34_swt.csv.cvs.csvdit,noai.csv	dit,noai	2	0.00756076				Eclipse PDE UI.csvfanIn,noai,nomi.csv	fanIn,noai,nomi	3	0.00246178
churn.csvdit,noai.csv	dit,noai	2	0.0115947				Lucene.csvdit,fanIn,fanOut,noc,nomi.csv	dit,fanIn,fanOut,noc,nomi	5	0.00246238
Eclipse PDE UI.csvdit,noai.csv	dit,noai	2	0.0120015				Eclipse PDE UI.csvdit,fanIn,nomi.csv	dit,fanIn,nomi	3	0.00247495
eclipse34_swt.csv.cvs.csvdit,nomi,noai.csv	dit,noai,nomi	3	0.00241281	0.00435103	8		single-version-ck-oo.csvdit,noc,noai,nomi.csv	dit,noc,noai,nomi	4	0.00251066
single-version-ck-oo.csvdit,noai,nomi.csv	dit,noai,nomi	3	0.00326568				Eclipse JDT Core.csvdit,noc,noai,nomi.csv	dit,noc,noai,nomi	4	0.00251435
Eclipse JDT Core.csvdit,noai,nomi.csv	dit,noai,nomi	3	0.00327131				Mylyn.csvdit,fanIn,noai,nomi.csv	dit,fanIn,noai,nomi	4	0.00251716
eclipse34_debug.csv.cvs.csvdit,nomi,noai.csv	dit,noai,nomi	3	0.00351782				churn.csvfanIn,fanOut,noai,nomi.csv	fanIn,fanOut,noai,nomi	4	0.00252974
Eclipse PDE UI.csvdit,noai,nomi.csv	dit,noai,nomi	3	0.00372247				churn.csvfanIn,fanOut,noc,noai,nomi.csv	fanIn,fanOut,noc,noai,nomi	5	0.00253402
Mylyn.csvdit,noai,nomi.csv	dit,noai,nomi	3	0.00553478				Lucene.csvfanIn,fanOut,noc,nomi.csv	fanIn,fanOut,noc,nomi	4	0.00253686
churn.csvdit,noai,nomi.csv	dit,noai,nomi	3	0.00585193				Lucene.csvfanIn,fanOut,nomi.csv	fanIn,fanOut,nomi	3	0.00255817
Lucene.csvdit,noai,nomi.csv	dit,noai,nomi	3	0.00723147				churn.csvdit,fanIn,fanOut,noai,nomi.csv	dit,fanIn,fanOut,noai,nomi	5	0.00255933
prop-1.csvdit,noc.csv	dit,noc	2	0.0102983	0.0109257	2		Eclipse JDT Core.csvfanIn,noc,nomi.csv	fanIn,noc,nomi	3	0.0025865
eclipse34_swt.csv.cvs.csvdit,noc.csv	dit,noc	2	0.0115531				Eclipse PDE UI.csvfanIn,noc,nomi.csv	fanIn,noc,nomi	3	0.00260523
single-version-ck-oo.csvdit,noc,noai.csv	dit,noc,noai	3	0.0034019	0.00620535	7		Lucene.csvdit,fanIn,fanOut,noc,noai,nomi.csv	dit,fanIn,fanOut,noc,noai,nomi	6	0.00260728
Eclipse JDT Core.csvdit,noc,noai.csv	dit,noc,noai	3	0.00377743				Mylyn.csvfanIn,noc,nomi.csv	fanIn,noc,nomi	3	0.00266571
eclipse34_debug.csv.cvs.csvdit,noc,noai.csv	dit,noc,noai	3	0.00411229				Eclipse PDE UI.csvdit,noc,noai,nomi.csv	dit,noc,noai,nomi	4	0.00266831
eclipse34_swt.csv.cvs.csvdit,noc,noai.csv	dit,noc,noai	3	0.00441119				Mylyn.csvdit,fanIn,nomi.csv	dit,fanIn,nomi	3	0.00270589
Eclipse PDE UI.csvdit,noc,noai.csv	dit,noc,noai	3	0.00668224				Eclipse JDT Core.csvnoc,noai,nomi.csv	noc,noai,nomi	3	0.00271216
churn.csvdit,noc,noai.csv	dit,noc,noai	3	0.00994045				Lucene.csvdit,fanIn,fanOut,nomi.csv	dit,fanIn,fanOut,nomi	4	0.00271662
Mylyn.csvdit,noc,noai.csv	dit,noc,noai	3	0.011112				Mylyn.csvfanIn,fanOut,noai.csv	fanIn,fanOut,noai	3	0.00273014
eclipse34_swt.csv.cvs.csvdit,noc,nomi,noai.csv	dit,noc,noai,nomi	4	0.00161777	0.00330512	8		Eclipse JDT Core.csvfanOut,noai.csv	fanOut,noai	2	0.00274408
eclipse34_debug.csv.cvs.csvdit,noc,nomi,noai.csv	dit,noc,noai,nomi	4	0.00244129				Eclipse JDT Core.csvdit,fanIn,noai.csv	dit,fanIn,noai	3	0.00276794
single-version-ck-oo.csvdit,noc,noai,nomi.csv	dit,noc,noai,nomi	4	0.00251066				Mylyn.csvfanIn,noai,nomi.csv	fanIn,noai,nomi	3	0.00277088
Eclipse JDT Core.csvdit,noc,noai,nomi.csv	dit,noc,noai,nomi	4	0.00251435				Mylyn.csvfanOut,nomi.csv	fanOut,nomi	2	0.0027753
Eclipse PDE UI.csvdit,noc,noai,nomi.csv	dit,noc,noai,nomi	4	0.00266831				Eclipse PDE UI.csvdit,fanOut,noai.csv	dit,fanOut,noai	3	0.0027828
Mylyn.csvdit,noc,noai,nomi.csv	dit,noc,noai,nomi	4	0.00397114				Eclipse PDE UI.csvnoc,noai,nomi.csv	noc,noai,nomi	3	0.00278987
churn.csvdit,noc,noai,nomi.csv	dit,noc,noai,nomi	4	0.00487056				Eclipse JDT Core.csvfanIn,nomi.csv	fanIn,nomi	2	0.00282081
Lucene.csvdit,noc,noai,nomi.csv	dit,noc,noai,nomi	4	0.00584685				Mylyn.csvdit,fanIn,fanOut .csv	dit,fanIn,fanOut	3	0.00286356
eclipse34_swt.csv.cvs.csvdit,noc,nomi.csv	dit,noc,nomi	3	0.00264397	0.00494883	8		single-version-ck-oo.csvnoc,noai,nomi.csv	noc,noai,nomi	3	0.0028785
Eclipse JDT Core.csvdit,noc,nomi.csv	dit,noc,nomi	3	0.00337193				Eclipse PDE UI.csvfanIn,nomi.csv	fanIn,nomi	2	0.00293568
single-version-ck-oo.csvdit,noc,nomi.csv	dit,noc,nomi	3	0.00340511				Mylyn.csvfanIn,fanOut,noc .csv	fanIn,fanOut,noc	3	0.00293891
eclipse34_debug.csv.cvs.csvdit,noc,nomi.csv	dit,noc,nomi	3	0.00350931				churn.csvdit,fanOut,noc,noai,nomi.csv	dit,fanOut,noc,noai,nomi	5	0.00297021
Eclipse PDE UI.csvdit,noc,nomi.csv	dit,noc,nomi	3	0.00358504				churn.csvfanOut,noc,noai,nomi.csv	fanOut,noc,noai,nomi	4	0.00298252
Mylyn.csvdit,noc,nomi.csv	dit,noc,nomi	3	0.00446761				Eclipse JDT Core.csvfanIn,fanOut,noc .csv	fanIn,fanOut,noc	3	0.00299279
Lucene.csvdit,noc,nomi.csv	dit,noc,nomi	3	0.00822666				Eclipse PDE UI.csvfanIn,fanOut,noc .csv	fanIn,fanOut,noc	3	0.00300198
churn.csvdit,noc,nomi.csv	dit,noc,nomi	3	0.010381				Lucene.csvdit,fanIn,fanOut,noai,nomi.csv	dit,fanIn,fanOut,noai,nomi	5	0.00307174
eclipse34_swt.csv.cvs.csvdit,nomi.csv	dit,nomi	2	0.00407756	0.00660643	6		single-version-ck-oo.csvnoc,fanIn,fanOut .csv	fanIn,fanOut,noc	3	0.00310502
Eclipse PDE UI.csvdit,nomi.csv	dit,nomi	2	0.00472669				Lucene.csvdit,fanIn,fanOut,noc,noai.csv	dit,fanIn,fanOut,noc,noai	5	0.00311642
Eclipse JDT Core.csvdit,nomi.csv	dit,nomi	2	0.00503678				Eclipse PDE UI.csvfanOut,noc,noai.csv	fanOut,noc,noai	3	0.00314186
eclipse34_debug.csv.cvs.csvdit,nomi.csv	dit,nomi	2	0.00607524				churn.csvdit,fanIn,fanOut,noc,nomi.csv	dit,fanIn,fanOut,noc,nomi	5	0.0031574
Mylyn.csvdit,nomi.csv	dit,nomi	2	0.00712489				churn.csvfanIn,noc,noai,nomi.csv	fanIn,noc,noai,nomi	4	0.0031612
single-version-ck-oo.csvdit,nomi.csv	dit,nomi	2	0.0125974				churn.csvdit,fanIn,fanOut,noc,noai.csv	dit,fanIn,fanOut,noc,noai	5	0.00320429
churn.csvfanIn,fanOut.csv	fanIn,fanOut	2	0.00900952	0.00561082	6		single-version-ck-oo.csvnoc,fanIn,noai.csv	fanIn,noc,noai	3	0.00325408
Mylyn.csvfanIn,fanOut .csv	fanIn,fanOut	2	0.00404648				churn.csvdit,fanOut,noai,nomi.csv	dit,fanOut,noai,nomi	4	0.00326032
Eclipse PDE UI.csvfanIn,fanOut .csv	fanIn,fanOut	2	0.00412144				single-version-ck-oo.csvdit,noai,nomi.csv	dit,noai,nomi	3	0.00326568
single-version-ck-oo.csvfanIn,fanOut .csv	fanIn,fanOut	2	0.00431708				Eclipse JDT Core.csvdit,noai,nomi.csv	dit,noai,nomi	3	0.00327131
Eclipse JDT Core.csvfanIn,fanOut .csv	fanIn,fanOut	2	0.00437949				churn.csvdit,fanIn,noc,noai,nomi.csv	dit,fanIn,noc,noai,nomi	5	0.00330285
Lucene.csvfanIn,fanOut .csv	fanIn,fanOut	2	0.00779091				Lucene.csvdit,fanOut,noc,nomi.csv	dit,fanOut,noc,nomi	4	0.00330651
Eclipse JDT Core.csvfanIn,fanOut,noai.csv	fanIn,fanOut,noai	3	0.00177765	0.00283755	6		churn.csvfanOut,noai,nomi.csv	fanOut,noai,nomi	3	0.00331165
single-version-ck-oo.csvfanIn,fanOut,noai.csv	fanIn,fanOut,noai	3	0.00190392				churn.csvfanIn,fanOut,noc,noai.csv	fanIn,fanOut,noc,noai	4	0.00331348
Eclipse PDE UI.csvfanIn,fanOut,noai.csv	fanIn,fanOut,noai	3	0.00218404				churn.csvdit,fanIn,fanOut,nomi.csv	dit,fanIn,fanOut,nomi	4	0.00332883
Mylyn.csvfanIn,fanOut,noai.csv	fanIn,fanOut,noai	3	0.00273014				Eclipse JDT Core.csvdit,noc,nomi.csv	dit,noc,nomi	3	0.00337193
churn.csvfanIn,fanOut,noai.csv	fanIn,fanOut,noai	3	0.00338572				single-version-ck-oo.csvfanIn,noai.csv	fanIn,noai	2	0.00337252
Lucene.csvfanIn,fanOut,noai.csv	fanIn,fanOut,noai	3	0.00504381				churn.csvfanIn,fanOut,noai.csv	fanIn,fanOut,noai	3	0.00338572
Eclipse PDE UI.csvfanIn,fanOut,noai,nomi.csv	fanIn,fanOut,noai,nomi	4	0.00128885	0.0017731	6		churn.csvfanIn,noai,nomi.csv	fanIn,noai,nomi	3	0.00340166
Mylyn.csvfanIn,fanOut,noai,nomi.csv	fanIn,fanOut,noai,nomi	4	0.00138342				single-version-ck-oo.csvdit,noc,nomi.csv	dit,noc,nomi	3	0.00340511
single-version-ck-oo.csvfanIn,fanOut,noai,nomi.csv	fanIn,fanOut,noai,nomi	4	0.00149658				churn.csvdit,fanIn,noai,nomi.csv	dit,fanIn,noai,nomi	4	0.0034349
Eclipse JDT Core.csvfanIn,fanOut,noai,nomi.csv	fanIn,fanOut,noai,nomi	4	0.00151014				churn.csvfanIn,fanOut,noc,nomi.csv	fanIn,fanOut,noc,nomi	4	0.00345009
Lucene.csvfanIn,fanOut,noai,nomi.csv	fanIn,fanOut,noai,nomi	4	0.00242987				Lucene.csvdit,fanIn,noc,noai,nomi.csv	dit,fanIn,noc,noai,nomi	5	0.00346388
churn.csvfanIn,fanOut,noai,nomi.csv	fanIn,fanOut,noai,nomi	4	0.00252974				Mylyn.csvfanIn,nomi.csv	fanIn,nomi	2	0.00349446
churn.csvfanIn,fanOut,noc.csv	fanIn,fanOut,noc	3	0.00727292	0.00409759	6		eclipse34_debug.csv.cvs.csvdit,noc,nomi.csv	dit,noc,nomi	3	0.00350931
Mylyn.csvfanIn,fanOut,noc .csv	fanIn,fanOut,noc	3	0.00293891				Eclipse PDE UI.csvdit,fanIn,noc,noai.csv	dit,fanIn,noc,noai	4	0.00351264
Eclipse JDT Core.csvfanIn,fanOut,noc .csv	fanIn,fanOut,noc	3	0.00299279				eclipse34_debug.csv.cvs.csvdit,nomi,noai.csv	dit,noai,nomi	3	0.00351782
Eclipse PDE UI.csvfanIn,fanOut,noc .csv	fanIn,fanOut,noc	3	0.00300198				Lucene.csvfanOut,noc,noai,nomi.csv	fanOut,noc,noai,nomi	4	0.00352265
single-version-ck-oo.csvnoc,fanIn,fanOut .csv	fanIn,fanOut,noc	3	0.00310502				Lucene.csvdit,fanIn,fanOut,noc .csv	dit,fanIn,fanOut,noc	4	0.00353287
Lucene.csvfanIn,fanOut,noc .csv	fanIn,fanOut,noc	3	0.00527392				ant-1.7.csvdit,noc,ic,mfa.csv	dit,ic,noc,mfa	4	0.00353392
Eclipse JDT Core.csvfanIn,fanOut,noc,noai.csv	fanIn,fanOut,noc,noai	4	0.00170658	0.00246988	6		Lucene.csvdit,fanOut,noc,noai,nomi.csv	dit,fanOut,noc,noai,nomi	5	0.00354875
single-version-ck-oo.csvnoc,fanIn,fanOut,noai.csv	fanIn,fanOut,noc,noai	4	0.00171858				churn.csvdit,fanIn,fanOut,noai.csv	dit,fanIn,fanOut,noai	4	0.00356159
Eclipse PDE UI.csvfanIn,fanOut,noc,noai.csv	fanIn,fanOut,noc,noai	4	0.00184402				Eclipse JDT Core.csvdit,fanOut,noc .csv	dit,fanOut,noc	3	0.00357744
Mylyn.csvfanIn,fanOut,noc,noai.csv	fanIn,fanOut,noc,noai	4	0.00213556				Lucene.csvdit,fanIn,noc,nomi.csv	dit,fanIn,noc,nomi	4	0.00358439
churn.csvfanIn,fanOut,noc,noai.csv	fanIn,fanOut,noc,noai	4	0.00331348				Eclipse PDE UI.csvdit,noc,nomi.csv	dit,noc,nomi	3	0.00358504
Lucene.csvfanIn,fanOut,noc,noai.csv	fanIn,fanOut,noc,noai	4	0.00410107				Eclipse PDE UI.csvdit,fanOut,noc .csv	dit,fanOut,noc	3	0.00361542
Eclipse PDE UI.csvfanIn,fanOut,noc,noai,nomi.csv	fanIn,fanOut,noc,noai,nomi	5	0.00119613	0.00171954	6		Mylyn.csvdit,fanOut,noc,noai.csv	dit,fanOut,noc,noai	4	0.00364166
Mylyn.csvfanIn,fanOut,noc,noai,nomi.csv	fanIn,fanOut,noc,noai,nomi	5	0.00122845				ant-1.7.csvdit,noc,mfa.csv	dit,mfa,noc	3	0.00367126
single-version-ck-oo.csvnoc,fanIn,fanOut,noai,nomi.csv	fanIn,fanOut,noc,noai,nomi	5	0.00145378				Lucene.csvfanOut,noc,nomi.csv	fanOut,noc,nomi	3	0.00368464
Eclipse JDT Core.csvfanIn,fanOut,noc,noai,nomi.csv	fanIn,fanOut,noc,noai,nomi	5	0.00145662				churn.csvfanIn,fanOut,nomi.csv	fanIn,fanOut,nomi	3	0.00371704
Lucene.csvfanIn,fanOut,noc,noai,nomi.csv	fanIn,fanOut,noc,noai,nomi	5	0.00244825				Eclipse PDE UI.csvdit,noai,nomi.csv	dit,noai,nomi	3	0.00372247
churn.csvfanIn,fanOut,noc,noai,nomi.csv	fanIn,fanOut,noc,noai,nomi	5	0.00253402				Eclipse JDT Core.csvdit,noc,noai.csv	dit,noc,noai	3	0.00377743
Eclipse PDE UI.csvfanIn,fanOut,noc,nomi.csv	fanIn,fanOut,noc,nomi	4	0.00124177	0.00192538	6		Eclipse PDE UI.csvdit,fanIn,noai.csv	dit,fanIn,noai	3	0.00379972
Mylyn.csvfanIn,fanOut,noc,nomi.csv	fanIn,fanOut,noc,nomi	4	0.00128475				Mylyn.csvdit,fanIn,noc,noai.csv	dit,fanIn,noc,noai	4	0.00380498
single-version-ck-oo.csvnoc,fanIn,fanOut,nomi.csv	fanIn,fanOut,noc,nomi	4	0.00151758				Lucene.csvdit,fanIn,noai,nomi.csv	dit,fanIn,noai,nomi	4	0.00382706
Eclipse JDT Core.csvfanIn,fanOut,noc,nomi.csv	fanIn,fanOut,noc,nomi	4	0.00152125				eclipse34_swt.csv.cvs.csvnomi,noai.csv	noai,nomi	2	0.00385868
Lucene.csvfanIn,fanOut,noc,nomi.csv	fanIn,fanOut,noc,nomi	4	0.00253686				Lucene.csvdit,fanOut,noai,nomi.csv	dit,fanOut,noai,nomi	4	0.00388639
churn.csvfanIn,fanOut,noc,nomi.csv	fanIn,fanOut,noc,nomi	4	0.00345009				ant-1.7.csvic,mfa.csv	ic,mfa	2	0.00388979
Eclipse PDE UI.csvfanIn,fanOut,nomi.csv	fanIn,fanOut,nomi	3	0.00136682	0.00206454	6		Lucene.csvfanIn,noc,noai,nomi.csv	fanIn,noc,noai,nomi	4	0.0039007
Mylyn.csvfanIn,fanOut,nomi.csv	fanIn,fanOut,nomi	3	0.00144258				Eclipse PDE UI.csvnoai,nomi.csv	noai,nomi	2	0.00393733
single-version-ck-oo.csvfanIn,fanOut,nomi.csv	fanIn,fanOut,nomi	3	0.00158605				xalan-2.4.csvdit,mfa,ic.csv	dit,ic,mfa	3	0.0039436
Eclipse JDT Core.csvfanIn,fanOut,nomi.csv	fanIn,fanOut,nomi	3	0.00171658				xalan-2.4.csvnoc,mfa,ic.csv	ic,mfa,noc	3	0.00396919
Lucene.csvfanIn,fanOut,nomi.csv	fanIn,fanOut,nomi	3	0.00255817				Mylyn.csvdit,noc,noai,nomi.csv	dit,noc,noai,nomi	4	0.00397114
churn.csvfanIn,fanOut,nomi.csv	fanIn,fanOut,nomi	3	0.00371704				eclipse34_debug.csv.cvs.csvnoc,nomi,noai.csv	noc,noai,nomi	3	0.00397241
Eclipse JDT Core.csvfanIn,noai.csv	fanIn,noai	2	0.00322636	0.0067331	6		ant-1.7.csvnoc,ic,mfa.csv	ic,mfa,noc	3	0.00397564
single-version-ck-oo.csvfanIn,noai.csv	fanIn,noai	2	0.00337252				Mylyn.csvfanIn,fanOut .csv	fanIn,fanOut	2	0.00404648
churn.csvfanIn,noai.csv	fanIn,noai	2	0.00579332				Lucene.csvdit,fanIn,fanOut,noai.csv	dit,fanIn,fanOut,noai	4	0.00408753
Eclipse PDE UI.csvfanIn,noai.csv	fanIn,noai	2	0.00639305				xalan-2.4.csvdit,noc,mfa,ic.csv	dit,ic,noc,mfa	4	0.00409775
Mylyn.csvfanIn,noai.csv	fanIn,noai	2	0.00990764				Lucene.csvfanIn,fanOut,noc,noai.csv	fanIn,fanOut,noc,noai	4	0.00410107
Lucene.csvfanIn,noai.csv	fanIn,noai	2	0.0117057				eclipse34_debug.csv.cvs.csvdit,noc,noai.csv	dit,noc,noai	3	0.00411229
single-version-ck-oo.csvfanIn,noai,nomi.csv	fanIn,noai,nomi	3	0.0020554	0.00284468	6		Eclipse PDE UI.csvfanIn,fanOut .csv	fanIn,fanOut	2	0.00412144
Eclipse JDT Core.csvfanIn,noai,nomi.csv	fanIn,noai,nomi	3	0.00206145				Eclipse JDT Core.csvnoai,nomi.csv	noai,nomi	2	0.00419878
Eclipse PDE UI.csvfanIn,noai,nomi.csv	fanIn,noai,nomi	3	0.00246178				Eclipse PDE UI.csvfanIn,noc,noai.csv	fanIn,noc,noai	3	0.00420181
Mylyn.csvfanIn,noai,nomi.csv	fanIn,noai,nomi	3	0.00277088				Lucene.csvdit,fanIn,fanOut .csv	dit,fanIn,fanOut	3	0.0042191
churn.csvfanIn,noai,nomi.csv	fanIn,noai,nomi	3	0.00340166				Lucene.csvfanIn,noc,nomi.csv	fanIn,noc,nomi	3	0.0042285
Lucene.csvfanIn,noai,nomi.csv	fanIn,noai,nomi	3	0.00431692				ant-1.7.csvdit,mfa.csv	dit,mfa	2	0.00428327
single-version-ck-oo.csvnoc,fanIn .csv	fanIn,noc	2	0.00828675	0.00880742	4		Lucene.csvfanIn,noai,nomi.csv	fanIn,noai,nomi	3	0.00431692
Eclipse PDE UI.csvfanIn,noc .csv	fanIn,noc	2	0.00835068				single-version-ck-oo.csvfanIn,fanOut .csv	fanIn,fanOut	2	0.00431708
Eclipse JDT Core.csvfanIn,noc .csv	fanIn,noc	2	0.00873218				ant-1.7.csvnoc,mfa.csv	noc,mfa	2	0.00433136
Mylyn.csvfanIn,noc .csv	fanIn,noc	2	0.00986007				Eclipse JDT Core.csvfanIn,fanOut .csv	fanIn,fanOut	2	0.00437949
Eclipse JDT Core.csvfanIn,noc,noai.csv	fanIn,noc,noai	3	0.00249201	0.00488576	6		eclipse34_swt.csv.cvs.csvdit,noc,noai.csv	dit,noc,noai	3	0.00441119
single-version-ck-oo.csvnoc,fanIn,noai.csv	fanIn,noc,noai	3	0.00325408				xalan-2.4.csvmfa,ic.csv	ic,mfa	2	0.00441678
Eclipse PDE UI.csvfanIn,noc,noai.csv	fanIn,noc,noai	3	0.00420181				Mylyn.csvdit,noc,nomi.csv	dit,noc,nomi	3	0.00446761
churn.csvfanIn,noc,noai.csv	fanIn,noc,noai	3	0.0052151				xalan-2.4.csvdit,noc,mfa.csv	dit,mfa,noc	3	0.00451171
Mylyn.csvfanIn,noc,noai.csv	fanIn,noc,noai	3	0.00590584				Eclipse JDT Core.csvnoc,nomi.csv	noc,nomi	2	0.00453185
Lucene.csvfanIn,noc,noai.csv	fanIn,noc,noai	3	0.00824573				Eclipse PDE UI.csvfanOut,noai.csv	fanOut,noai	2	0.0045713
single-version-ck-oo.csvnoc,fanIn,noai,nomi.csv	fanIn,noc,noai,nomi	4	0.00184296	0.0025439	6		Lucene.csvfanOut,noai,nomi.csv	fanOut,noai,nomi	3	0.00459975
Eclipse JDT Core.csvfanIn,noc,noai,nomi.csv	fanIn,noc,noai,nomi	4	0.00189413				churn.csvdit,fanOut,noc,noai.csv	dit,fanOut,noc,noai	4	0.00461617
Mylyn.csvfanIn,noc,noai,nomi.csv	fanIn,noc,noai,nomi	4	0.00216285				churn.csvfanOut,noc,noai.csv	fanOut,noc,noai	3	0.0046457
Eclipse PDE UI.csvfanIn,noc,noai,nomi.csv	fanIn,noc,noai,nomi	4	0.00230155				xalan-2.4.csvnoc,mfa.csv	noc,mfa	2	0.00466123
churn.csvfanIn,noc,noai,nomi.csv	fanIn,noc,noai,nomi	4	0.0031612				single-version-ck-oo.csvdit,noc,fanIn .csv	dit,fanIn,noc	3	0.00468144
Lucene.csvfanIn,noc,noai,nomi.csv	fanIn,noc,noai,nomi	4	0.0039007				Eclipse JDT Core.csvdit,fanIn,noc .csv	dit,fanIn,noc	3	0.00468322
single-version-ck-oo.csvnoc,fanIn,nomi.csv	fanIn,noc,nomi	3	0.0023253	0.00338544	6		Eclipse PDE UI.csvdit,nomi.csv	dit,nomi	2	0.00472669
Eclipse JDT Core.csvfanIn,noc,nomi.csv	fanIn,noc,nomi	3	0.0025865				xalan-2.4.csvdit,mfa.csv	dit,mfa	2	0.00473347
Eclipse PDE UI.csvfanIn,noc,nomi.csv	fanIn,noc,nomi	3	0.00260523				Lucene.csvdit,fanIn,nomi.csv	dit,fanIn,nomi	3	0.0047791
Mylyn.csvfanIn,noc,nomi.csv	fanIn,noc,nomi	3	0.00266571				Eclipse PDE UI.csvnoc,nomi.csv	noc,nomi	2	0.00481589
Lucene.csvfanIn,noc,nomi.csv	fanIn,noc,nomi	3	0.0042285				churn.csvdit,fanIn,noc,noai.csv	dit,fanIn,noc,noai	4	0.00485885
churn.csvfanIn,noc,nomi.csv	fanIn,noc,nomi	3	0.0059014				churn.csvdit,noc,noai,nomi.csv	dit,noc,noai,nomi	4	0.00487056
single-version-ck-oo.csvfanIn,nomi.csv	fanIn,nomi	2	0.00280575	0.00422964	6		churn.csvdit,fanOut,noc,nomi.csv	dit,fanOut,noc,nomi	4	0.00487442
Eclipse JDT Core.csvfanIn,nomi.csv	fanIn,nomi	2	0.00282081				Mylyn.csvfanOut,noc,noai.csv	fanOut,noc,noai	3	0.00489231
Eclipse PDE UI.csvfanIn,nomi.csv	fanIn,nomi	2	0.00293568				Mylyn.csvnoc,noai,nomi.csv	noc,noai,nomi	3	0.00499307
Mylyn.csvfanIn,nomi.csv	fanIn,nomi	2	0.00349446				churn.csvdit,fanIn,noc,nomi.csv	dit,fanIn,noc,nomi	4	0.00501199
Lucene.csvfanIn,nomi.csv	fanIn,nomi	2	0.00589605				Eclipse JDT Core.csvdit,nomi.csv	dit,nomi	2	0.00503678
churn.csvfanIn,nomi.csv	fanIn,nomi	2	0.00742509				Lucene.csvfanIn,fanOut,noai.csv	fanIn,fanOut,noai	3	0.00504381
single-version-ck-oo.csvfanOut,noai.csv	fanOut,noai	2	0.0026744	0.00469632	5		eclipse34_swt.csv.cvs.csvnoc,nomi.csv	noc,nomi	2	0.00506917
Eclipse JDT Core.csvfanOut,noai.csv	fanOut,noai	2	0.00274408				Eclipse JDT Core.csvdit,noai.csv	dit,noai	2	0.00508698
Eclipse PDE UI.csvfanOut,noai.csv	fanOut,noai	2	0.0045713				Lucene.csvdit,fanOut,nomi.csv	dit,fanOut,nomi	3	0.00508911
churn.csvfanOut,noai.csv	fanOut,noai	2	0.00558575				Mylyn.csvdit,fanOut,noai.csv	dit,fanOut,noai	3	0.00511156
Mylyn.csvfanOut,noai.csv	fanOut,noai	2	0.0079061				Lucene.csvfanOut,nomi.csv	fanOut,nomi	2	0.00520355
Eclipse PDE UI.csvfanOut,noai,nomi.csv	fanOut,noai,nomi	3	0.00176832	0.00262785	6		churn.csvfanIn,noc,noai.csv	fanIn,noc,noai	3	0.0052151
single-version-ck-oo.csvfanOut,noai,nomi.csv	fanOut,noai,nomi	3	0.00185824				Lucene.csvfanIn,fanOut,noc .csv	fanIn,fanOut,noc	3	0.00527392
Eclipse JDT Core.csvfanOut,noai,nomi.csv	fanOut,noai,nomi	3	0.00186115				Eclipse JDT Core.csvnoc,noai.csv	noc,noai	2	0.00529512
Mylyn.csvfanOut,noai,nomi.csv	fanOut,noai,nomi	3	0.00236799				churn.csvdit,fanOut,nomi.csv	dit,fanOut,nomi	3	0.0053008
churn.csvfanOut,noai,nomi.csv	fanOut,noai,nomi	3	0.00331165				churn.csvnoc,noai,nomi.csv	noc,noai,nomi	3	0.00533842
Lucene.csvfanOut,noai,nomi.csv	fanOut,noai,nomi	3	0.00459975				Mylyn.csvdit,fanOut,noc .csv	dit,fanOut,noc	3	0.00534933
single-version-ck-oo.csvnoc,fanOut .csv	fanOut,noc	2	0.00710003	0.00753571	4		churn.csvdit,fanOut,noai.csv	dit,fanOut,noai	3	0.00536441
Eclipse JDT Core.csvfanOut,noc .csv	fanOut,noc	2	0.00717241				churn.csvfanOut,noc,nomi.csv	fanOut,noc,nomi	3	0.00548922
Eclipse PDE UI.csvfanOut,noc .csv	fanOut,noc	2	0.00782366				eclipse34_debug.csv.cvs.csvnoc,nomi.csv	noc,nomi	2	0.00551831
Mylyn.csvfanOut,noc .csv	fanOut,noc	2	0.00804675				Mylyn.csvdit,noai,nomi.csv	dit,noai,nomi	3	0.00553478
Eclipse JDT Core.csvfanOut,noc,noai.csv	fanOut,noc,noai	3	0.00211354	0.00416503	6		churn.csvfanOut,noai.csv	fanOut,noai	2	0.00558575
single-version-ck-oo.csvnoc,fanOut,noai.csv	fanOut,noc,noai	3	0.00220302				Lucene.csvdit,fanOut,noc,noai.csv	dit,fanOut,noc,noai	4	0.00574662
Eclipse PDE UI.csvfanOut,noc,noai.csv	fanOut,noc,noai	3	0.00314186				churn.csvdit,fanIn,fanOut,noc.csv	dit,fanIn,fanOut,noc	4	0.00575723
churn.csvfanOut,noc,noai.csv	fanOut,noc,noai	3	0.0046457				Lucene.csvdit,fanIn,noc,noai.csv	dit,fanIn,noc,noai	4	0.00578172
Mylyn.csvfanOut,noc,noai.csv	fanOut,noc,noai	3	0.00489231				churn.csvfanIn,noai.csv	fanIn,noai	2	0.00579332
Lucene.csvfanOut,noc,noai.csv	fanOut,noc,noai	3	0.00799378				Lucene.csvdit,noc,noai,nomi.csv	dit,noc,noai,nomi	4	0.00584685
Eclipse PDE UI.csvfanOut,noc,noai,nomi.csv	fanOut,noc,noai,nomi	4	0.00153113	0.00223489	6		churn.csvdit,noai,nomi.csv	dit,noai,nomi	3	0.00585193
single-version-ck-oo.csvnoc,fanOut,noai,nomi.csv	fanOut,noc,noai,nomi	4	0.00170673				Lucene.csvfanIn,nomi.csv	fanIn,nomi	2	0.00589605
Eclipse JDT Core.csvfanOut,noc,noai,nomi.csv	fanOut,noc,noai,nomi	4	0.00175334				churn.csvfanIn,noc,nomi.csv	fanIn,noc,nomi	3	0.0059014
Mylyn.csvfanOut,noc,noai,nomi.csv	fanOut,noc,noai,nomi	4	0.00191298				churn.csvdit,fanIn,noai.csv	dit,fanIn,noai	3	0.00590564
churn.csvfanOut,noc,noai,nomi.csv	fanOut,noc,noai,nomi	4	0.00298252				Mylyn.csvfanIn,noc,noai.csv	fanIn,noc,noai	3	0.00590584
Lucene.csvfanOut,noc,noai,nomi.csv	fanOut,noc,noai,nomi	4	0.00352265				eclipse34_debug.csv.cvs.csvdit,nomi.csv	dit,nomi	2	0.00607524
Eclipse PDE UI.csvfanOut,noc,nomi.csv	fanOut,noc,nomi	3	0.00172567	0.00278399	6		xalan-2.4.csvmfa.csv	mfa	1	0.00626112
single-version-ck-oo.csvnoc,fanOut,nomi.csv	fanOut,noc,nomi	3	0.00184458				churn.csvdit,fanIn,nomi.csv	dit,fanIn,nomi	3	0.00630993
Eclipse JDT Core.csvfanOut,noc,nomi.csv	fanOut,noc,nomi	3	0.00184683				Eclipse PDE UI.csvfanIn,noai.csv	fanIn,noai	2	0.00639305
Mylyn.csvfanOut,noc,nomi.csv	fanOut,noc,nomi	3	0.00211298				churn.csvnoai,nomi.csv	noai,nomi	2	0.00655205
Lucene.csvfanOut,noc,nomi.csv	fanOut,noc,nomi	3	0.00368464				Mylyn.csvdit,fanIn,noc .csv	dit,fanIn,noc	3	0.00657253
churn.csvfanOut,noc,nomi.csv	fanOut,noc,nomi	3	0.00548922				Lucene.csvdit,fanOut,noai.csv	dit,fanOut,noai	3	0.0066341
Eclipse PDE UI.csvfanOut,nomi.csv	fanOut,nomi	2	0.00212879	0.00358918	6		Eclipse PDE UI.csvdit,noc,noai.csv	dit,noc,noai	3	0.00668224
Eclipse JDT Core.csvfanOut,nomi.csv	fanOut,nomi	2	0.00218486				Mylyn.csvnoc,nomi.csv	noc,nomi	2	0.00678361
single-version-ck-oo.csvfanOut,nomi.csv	fanOut,nomi	2	0.00218573				single-version-ck-oo.csvdit,fanOut .csv	dit,fanOut	2	0.00684173
Mylyn.csvfanOut,nomi.csv	fanOut,nomi	2	0.0027753				Lucene.csvnoc,noai,nomi.csv	noc,noai,nomi	3	0.0070566
Lucene.csvfanOut,nomi.csv	fanOut,nomi	2	0.00520355				churn.csvfanOut,nomi.csv	fanOut,nomi	2	0.00705683
churn.csvfanOut,nomi.csv	fanOut,nomi	2	0.00705683				prop-1.csvdit,noc,ic.csv	dit,ic,mfa	3	0.00709153
prop-1.csvmfa,ic.csv	ic,mfa	2	0.00115577	0.00315411	3		Mylyn.csvdit,nomi.csv	dit,nomi	2	0.00712489
ant-1.7.csvic,mfa.csv	ic,mfa	2	0.00388979				Mylyn.csvdit,fanIn,noai.csv	dit,fanIn,noai	3	0.00717157
xalan-2.4.csvmfa,ic.csv	ic,mfa	2	0.00441678				Eclipse JDT Core.csvfanOut,noc .csv	fanOut,noc	2	0.00717241
prop-1.csvnoc,mfa,ic.csv	ic,mfa,noc	3	0.000867884	0.00293757	3		Lucene.csvdit,noai,nomi.csv	dit,noai,nomi	3	0.00723147
xalan-2.4.csvnoc,mfa,ic.csv	ic,mfa,noc	3	0.00396919				Eclipse PDE UI.csvdit,fanOut .csv	dit,fanOut	2	0.00725111
ant-1.7.csvnoc,ic,mfa.csv	ic,mfa,noc	3	0.00397564				churn.csvfanIn,nomi.csv	fanIn,nomi	2	0.00742509
prop-1.csvmfa.csv	mfa	1	0.00242254	0.0073134	3		eclipse34_swt.csv.cvs.csvdit,noai.csv	dit,noai	2	0.00756076
xalan-2.4.csvmfa.csv	mfa	1	0.00626112				eclipse34_debug.csv.cvs.csvnomi,noai.csv	noai,nomi	2	0.0077801
ant-1.7.csvmfa.csv	mfa	1	0.0132565				Lucene.csvfanIn,fanOut .csv	fanIn,fanOut	2	0.00779091
single-version-ck-oo.csvnoai.csv	noai	1	0.0089486	0.00915982	2		Eclipse PDE UI.csvfanOut,noc .csv	fanOut,noc	2	0.00782366
Eclipse JDT Core.csvnoai.csv	noai	1	0.00937104				Mylyn.csvfanOut,noai.csv	fanOut,noai	2	0.0079061
single-version-ck-oo.csvnoai,nomi.csv	noai,nomi	2	0.00351251	0.00600452	8		Lucene.csvfanOut,noc,noai.csv	fanOut,noc,noai	3	0.00799378
eclipse34_swt.csv.cvs.csvnomi,noai.csv	noai,nomi	2	0.00385868				Mylyn.csvfanOut,noc .csv	fanOut,noc	2	0.00804675
Eclipse PDE UI.csvnoai,nomi.csv	noai,nomi	2	0.00393733				Lucene.csvdit,noc,nomi.csv	dit,noc,nomi	3	0.00822666
Eclipse JDT Core.csvnoai,nomi.csv	noai,nomi	2	0.00419878				Lucene.csvfanIn,noc,noai.csv	fanIn,noc,noai	3	0.00824573
churn.csvnoai,nomi.csv	noai,nomi	2	0.00655205				Eclipse PDE UI.csvfanIn,noc .csv	fanIn,noc	2	0.00835068
eclipse34_debug.csv.cvs.csvnomi,noai.csv	noai,nomi	2	0.0077801				single-version-ck-oo.csvdit,fanIn .csv	dit,fanIn	2	0.00851909
Mylyn.csvnoai,nomi.csv	noai,nomi	2	0.00868084				Lucene.csvdit,fanIn,noai.csv	dit,fanIn,noai	3	0.00859325
Lucene.csvnoai,nomi.csv	noai,nomi	2	0.00951586				Eclipse PDE UI.csvnoc,noai.csv	noc,noai	2	0.00859909
prop-1.csvnoc,mfa.csv	noc,mfa	2	0.00123457	0.00340906	3		Mylyn.csvnoai,nomi.csv	noai,nomi	2	0.00868084
ant-1.7.csvnoc,mfa.csv	noc,mfa	2	0.00433136				Eclipse JDT Core.csvdit,fanIn .csv	dit,fanIn	2	0.0087158
xalan-2.4.csvnoc,mfa.csv	noc,mfa	2	0.00466123				Eclipse JDT Core.csvfanIn,noc .csv	fanIn,noc	2	0.00873218
single-version-ck-oo.csvnoc,noai.csv	noc,noai	2	0.00479158	0.00780015	5		Eclipse JDT Core.csvnomi.csv	nomi	1	0.008749
Eclipse JDT Core.csvnoc,noai.csv	noc,noai	2	0.00529512				Eclipse PDE UI.csvnomi.csv	nomi	1	0.00887959
Eclipse PDE UI.csvnoc,noai.csv	noc,noai	2	0.00859909				Lucene.csvdit,fanIn,noc .csv	dit,fanIn,noc	3	0.00911119
eclipse34_swt.csv.cvs.csvnoc,noai.csv	noc,noai	2	0.00965632				Lucene.csvdit,fanOut,noc .csv	dit,fanOut,noc	3	0.00912773
churn.csvnoc,noai.csv	noc,noai	2	0.0106586				Eclipse JDT Core.csvnoai.csv	noai	1	0.00937104
eclipse34_swt.csv.cvs.csvnoc,nomi,noai.csv	noc,noai,nomi	3	0.00267973	0.0040526	8		Lucene.csvnoc,nomi.csv	noc,nomi	2	0.00944713
Eclipse JDT Core.csvnoc,noai,nomi.csv	noc,noai,nomi	3	0.00271216				Lucene.csvnoai,nomi.csv	noai,nomi	2	0.00951586
Eclipse PDE UI.csvnoc,noai,nomi.csv	noc,noai,nomi	3	0.00278987				eclipse34_swt.csv.cvs.csvnoc,noai.csv	noc,noai	2	0.00965632
single-version-ck-oo.csvnoc,noai,nomi.csv	noc,noai,nomi	3	0.0028785				Mylyn.csvfanIn,noc .csv	fanIn,noc	2	0.00986007
eclipse34_debug.csv.cvs.csvnoc,nomi,noai.csv	noc,noai,nomi	3	0.00397241				Mylyn.csvfanIn,noai.csv	fanIn,noai	2	0.00990764
Mylyn.csvnoc,noai,nomi.csv	noc,noai,nomi	3	0.00499307				churn.csvdit,noc,noai.csv	dit,noc,noai	3	0.00994045
churn.csvnoc,noai,nomi.csv	noc,noai,nomi	3	0.00533842				churn.csvdit,noc,nomi.csv	dit,noc,nomi	3	0.010381
Lucene.csvnoc,noai,nomi.csv	noc,noai,nomi	3	0.0070566				churn.csvnoc,noai.csv	noc,noai	2	0.0106586
single-version-ck-oo.csvnoc,nomi.csv	noc,nomi	2	0.00447439	0.00580577	7		Mylyn.csvdit,fanOut .csv	dit,fanOut	2	0.0106661
Eclipse JDT Core.csvnoc,nomi.csv	noc,nomi	2	0.00453185				Mylyn.csvdit,noc,noai.csv	dit,noc,noai	3	0.011112
Eclipse PDE UI.csvnoc,nomi.csv	noc,nomi	2	0.00481589				eclipse34_swt.csv.cvs.csvdit,noc.csv	dit,noc	2	0.0115531
eclipse34_swt.csv.cvs.csvnoc,nomi.csv	noc,nomi	2	0.00506917				churn.csvdit,noai.csv	dit,noai	2	0.0115947
eclipse34_debug.csv.cvs.csvnoc,nomi.csv	noc,nomi	2	0.00551831				Lucene.csvfanIn,noai.csv	fanIn,noai	2	0.0117057
Mylyn.csvnoc,nomi.csv	noc,nomi	2	0.00678361				Eclipse PDE UI.csvdit,noai.csv	dit,noai	2	0.0120015
Lucene.csvnoc,nomi.csv	noc,nomi	2	0.00944713				Mylyn.csvdit,fanIn .csv	dit,fanIn	2	0.0121958
single-version-ck-oo.csvnomi.csv	nomi	1	0.00789442	0.00850767	3		ant-1.7.csvdit,ic,mfa.csv	dit,ic,mfa	3	0.012587
Eclipse JDT Core.csvnomi.csv	nomi	1	0.008749				single-version-ck-oo.csvdit,nomi.csv	dit,nomi	2	0.0125974
Eclipse PDE UI.csvnomi.csv	nomi	1	0.00887959				ant-1.7.csvmfa.csv	mfa	1	0.0132565
					367

## Sheet: Sheet3
Features	# F	# Sets	Min Error Rate	Average
mfa	1	3	0.00242254	0.0073134												Average Error	Average Error (10^3)	Cardinality of Feature set
nomi	1	3	0.00789442	0.00850767												0.00832696	83.2696	1
noai	1	2	0.0089486	0.00915982												0.00631195	63.1195	2
ic,mfa	2	3	0.00115577	0.00315411												0.0039842	39.842	3
noc,mfa	2	3	0.00123457	0.00340906												0.00262644	26.2644	4
dit,mfa	2	3	0.00125003	0.00342226												0.00202883	20.2883	5
fanOut,nomi	2	6	0.00212879	0.00358918												0.00174275	17.4276	6
fanIn,nomi	2	6	0.00280575	0.00422964
fanOut,noai	2	5	0.0026744	0.00469633
fanIn,fanOut	2	6	0.00900952	0.00561082
noc,nomi	2	7	0.00447439	0.00580577
noai,nomi	2	8	0.00351251	0.00600452
dit,nomi	2	6	0.00407756	0.00660643
fanIn,noai	2	6	0.00322636	0.0067331
fanOut,noc	2	4	0.00710003	0.00753571
noc,noai	2	5	0.00479158	0.00780015
dit,fanOut	2	4	0.00660297	0.00784048
dit,noai	2	5	0.0050435	0.00825749
fanIn,noc	2	4	0.00828675	0.00880742
dit,fanIn	2	4	0.00731683	0.00918689
dit,noc	2	2	0.0102983	0.0109257
fanIn,fanOut,nomi	3	6	0.00136682	0.00206454
fanOut,noai,nomi	3	6	0.00176832	0.00262785
fanOut,noc,nomi	3	6	0.00172567	0.00278399
fanIn,fanOut,noai	3	6	0.00177765	0.00283755
fanIn,noai,nomi	3	6	0.0020554	0.00284468
ic,mfa,noc	3	3	0.000867884	0.00293757
dit,mfa,noc	3	3	0.00088743	0.00302346
dit,fanOut,nomi	3	6	0.00182221	0.00311816
fanIn,noc,nomi	3	6	0.0023253	0.00338544
dit,fanIn,nomi	3	6	0.00234283	0.00349319
dit,fanIn,fanOut	3	6	0.00764955	0.00357951
dit,fanOut,noai	3	6	0.00217649	0.00404599
noc,noai,nomi	3	8	0.00267973	0.0040526
fanIn,fanOut,noc	3	6	0.00727292	0.00409759
fanOut,noc,noai	3	6	0.00211354	0.00416504
dit,noai,nomi	3	8	0.00241281	0.00435103
fanIn,noc,noai	3	6	0.00249201	0.00488576
dit,noc,nomi	3	8	0.00264397	0.00494883
dit,fanOut,noc	3	5	0.00348926	0.00503184
dit,fanIn,noai	3	6	0.00251571	0.00512564
dit,fanIn,noc	3	5	0.00447561	0.0059048
dit,ic,mfa	3	4	0.000883099	0.00612631
dit,noc,noai	3	7	0.0034019	0.00620535
fanIn,fanOut,noai,nomi	4	6	0.00128885	0.0017731
fanIn,fanOut,noc,nomi	4	6	0.00124177	0.00192538
dit,fanIn,fanOut,nomi	4	6	0.00127442	0.00196305
fanOut,noc,noai,nomi	4	6	0.00153113	0.00223489
dit,fanIn,fanOut,noai	4	6	0.00159019	0.00244551
fanIn,fanOut,noc,noai	4	6	0.00170658	0.00246988
dit,fanOut,noai,nomi	4	6	0.00163413	0.00248353
fanIn,noc,noai,nomi	4	6	0.00184296	0.0025439
dit,fanOut,noc,nomi	4	6	0.00159184	0.00254432
dit,fanIn,noai,nomi	4	6	0.00199035	0.00269927
dit,ic,noc,mfa	4	3	0.000723343	0.002785
dit,fanIn,noc,nomi	4	6	0.00202118	0.00284964
dit,fanIn,fanOut,noc	4	6	0.0021071	0.0029093
dit,noc,noai,nomi	4	8	0.00161777	0.00330512
dit,fanOut,noc,noai	4	6	0.00193526	0.0033338
dit,fanIn,noc,noai	4	6	0.00218169	0.00375739
fanIn,fanOut,noc,noai,nomi	5	6	0.00119613	0.00171954
dit,fanIn,fanOut,noc,nomi	5	6	0.00122368	0.00185166
dit,fanIn,fanOut,noai,nomi	5	6	0.00127141	0.00186301
dit,fanIn,fanOut,noc,noai	5	6	0.00148304	0.00212353
dit,fanOut,noc,noai,nomi	5	6	0.00146318	0.00219611
dit,fanIn,noc,noai,nomi	5	6	0.00181797	0.00241915
dit,fanIn,fanOut,noc,noai,nomi	6	6	0.00118132	0.00174275
		367

## Sheet: Sheet1
dataset	featuresset	n	Errors	average			dataset	Total	Least				Feature wise(error
prop-1	mfa	1	0.00242254				single-version-ck-oo	58	8	0.137931			Feature	Error
xalan-2	mfa	1	0.00626112				Eclipse JDT Core	58	8	0.137931		1	mfa	0.00242254
single-version-ck-oo	nomi	1	0.00789442				xalan-2	8	1	0.125		2	ic,mfa	0.00115577
Eclipse JDT Core	nomi	1	0.008749	0.00850767			Eclipse PDE UI	57	10	0.175439		3	ic,mfa,noc	0.000867884
Eclipse PDE UI	nomi	1	0.00887959				prop-1	10	0	0		4	dit,ic,noc,mfa	0.000723343
single-version-ck-oo	noai	1	0.0089486				ant-1	8	1	0.125		5	fanIn,fanOut,noc,noai,nomi	0.00119613
Eclipse JDT Core	noai	1	0.00937104	0.00915982			Mylyn	54	11	0.203704		6	dit,fanIn,fanOut,noc,noai,nomi	0.00118132
ant-1	mfa	1	0.0132565	0.00748334			eclipse34_swt	23	4	0.173913
prop-1	ic,mfa	2	0.00115577				eclipse34_debug	20	6	0.3			Overall (error)
prop-1	noc,mfa	2	0.00123457				Lucene	47	22	0.468085		4	dit,ic,noc,mfa	0.000723343	1	444
prop-1	dit,mfa	2	0.00125003				churn	48	22	0.458333		3	ic,mfa,noc	0.000867884	2	444
Eclipse PDE UI	fanOut,nomi	2	0.00212879				Equinox Framework	0	0	#DIV/0!		2	ic,mfa	0.00115577	6	444
Eclipse JDT Core	fanOut,nomi	2	0.00218486				tomcat	0	0	#DIV/0!		6	dit,fanIn,fanOut,noc,noai,nomi	0.00118132	7	444
single-version-ck-oo	fanOut,nomi	2	0.00218573				camel-1	0	0	#DIV/0!		5	fanIn,fanOut,noc,noai,nomi	0.00119613	8	444
single-version-ck-oo	fanOut,noai	2	0.0026744				jedit-3	0	0	#DIV/0!		1	mfa	0.00242254	334	444
Eclipse JDT Core	fanOut,noai	2	0.00274408
Mylyn	fanOut,nomi	2	0.0027753										Overall (Average
single-version-ck-oo	fanIn,nomi	2	0.00280575									5	dit,IFANIN,noc,nomi,noai	0.00191718	1	81
Eclipse JDT Core	fanIn,nomi	2	0.00282081									3	fanIn,fanOut,nomi	0.0019467	2	81
Eclipse PDE UI	fanIn,nomi	2	0.00293568									4	dit,noc,nomi,noai	0.00202953	3	81
Eclipse JDT Core	fanIn,noai	2	0.00322636									6	dit,fanIn,fanOut,noc,noai,nomi	0.00221739	4	81
single-version-ck-oo	fanIn,noai	2	0.00337252									2	fanOut,nomi	0.00416124	30	81
Mylyn	fanIn,nomi	2	0.00349446									1	mfa	0.00748334	63	81
single-version-ck-oo	noai,nomi	2	0.00351251
eclipse34_swt	noai,nomi	2	0.00385868										Feature wise (average)
ant-1	ic,mfa	2	0.00388979	0.00563833								1	mfa	0.00748334
Eclipse PDE UI	noai,nomi	2	0.00393733									2	fanOut,nomi	0.00416124
Mylyn	fanIn,fanOut	2	0.00404648									3	fanIn,fanOut,nomi	0.0019467
eclipse34_swt	dit,nomi	2	0.00407756									4	dit,noc,nomi,noai	0.00202953
Eclipse PDE UI	fanIn,fanOut	2	0.00412144									5	dit,IFANIN,noc,nomi,noai	0.00191718
Eclipse JDT Core	noai,nomi	2	0.00419878									6	dit,fanIn,fanOut,noc,noai,nomi	0.00221739
ant-1	dit,mfa	2	0.00428327	0.00511336
single-version-ck-oo	fanIn,fanOut	2	0.00431708
ant-1	noc,mfa	2	0.00433136	0.00462181
Eclipse JDT Core	fanIn,fanOut	2	0.00437949
xalan-2	ic,mfa	2	0.00441678
single-version-ck-oo	noc,nomi	2	0.00447439
Eclipse JDT Core	noc,nomi	2	0.00453185	0.00580577
Eclipse PDE UI	fanOut,noai	2	0.0045713
xalan-2	noc,mfa	2	0.00466123
Eclipse PDE UI	dit,nomi	2	0.00472669
xalan-2	dit,mfa	2	0.00473347
single-version-ck-oo	noc,noai	2	0.00479158
Eclipse PDE UI	noc,nomi	2	0.00481589
Eclipse JDT Core	dit,nomi	2	0.00503678	0.00660643
single-version-ck-oo	dit,noai	2	0.0050435
eclipse34_swt	noc,nomi	2	0.00506917
Eclipse JDT Core	dit,noai	2	0.00508698
Lucene	fanOut,nomi	2	0.00520355
Eclipse JDT Core	noc,noai	2	0.00529512
eclipse34_debug	noc,nomi	2	0.00551831
churn	fanOut,noai	2	0.00558575	0.00469632
churn	fanIn,noai	2	0.00579332	0.0067331
Lucene	fanIn,nomi	2	0.00589605
eclipse34_debug	dit,nomi	2	0.00607524
Eclipse PDE UI	fanIn,noai	2	0.00639305
churn	noai,nomi	2	0.00655205	0.00600452
Eclipse JDT Core	dit,fanOut	2	0.00660297	0.00784048
Mylyn	noc,nomi	2	0.00678361
single-version-ck-oo	dit,fanOut	2	0.00684173
churn	fanOut,nomi	2	0.00705683	0.00416124
single-version-ck-oo	fanOut,noc	2	0.00710003
Mylyn	dit,nomi	2	0.00712489
Eclipse JDT Core	fanOut,noc	2	0.00717241	0.00753571
Eclipse PDE UI	dit,fanOut	2	0.00725111
Eclipse PDE UI	dit,fanIn	2	0.00731683
churn	fanIn,nomi	2	0.00742509	0.00470589
eclipse34_swt	dit,noai	2	0.00756076
eclipse34_debug	noai,nomi	2	0.0077801
Lucene	fanIn,fanOut	2	0.00779091
Eclipse PDE UI	fanOut,noc	2	0.00782366
Mylyn	fanOut,noai	2	0.0079061
Mylyn	fanOut,noc	2	0.00804675
single-version-ck-oo	fanIn,noc	2	0.00828675
Eclipse PDE UI	fanIn,noc	2	0.00835068
single-version-ck-oo	dit,fanIn	2	0.00851909
Eclipse PDE UI	noc,noai	2	0.00859909
Mylyn	noai,nomi	2	0.00868084
Eclipse JDT Core	dit,fanIn	2	0.0087158	0.00918689
Eclipse JDT Core	fanIn,noc	2	0.00873218	0.00880742
churn	fanIn,fanOut	2	0.00900952	0.00580426
Lucene	noc,nomi	2	0.00944713
Lucene	noai,nomi	2	0.00951586
eclipse34_swt	noc,noai	2	0.00965632
eclipse34_debug	IFANIN,nomi	2	0.00972021	0.0101481
Mylyn	fanIn,noc	2	0.00986007
Mylyn	fanIn,noai	2	0.00990764
prop-1	dit,noc	2	0.0102983
eclipse34_swt	IFANIN,nomi	2	0.0105759
churn	noc,noai	2	0.0106586	0.00780015
Mylyn	dit,fanOut	2	0.0106661
eclipse34_swt	dit,noc	2	0.0115531	0.0109257
churn	dit,noai	2	0.0115947	0.00825749
Lucene	fanIn,noai	2	0.0117057
Eclipse PDE UI	dit,noai	2	0.0120015
Mylyn	dit,fanIn	2	0.0121958
single-version-ck-oo	dit,nomi	2	0.0125974
prop-1	ic,mfa,noc	3	0.000867884
prop-1	dit,ic,mfa	3	0.000883099
prop-1	dit,mfa,noc	3	0.00088743
Eclipse PDE UI	fanIn,fanOut,nomi	3	0.00136682
Mylyn	fanIn,fanOut,nomi	3	0.00144258
single-version-ck-oo	fanIn,fanOut,nomi	3	0.00158605
Eclipse JDT Core	fanIn,fanOut,nomi	3	0.00171658
Eclipse PDE UI	fanOut,noc,nomi	3	0.00172567
Eclipse PDE UI	fanOut,noai,nomi	3	0.00176832
Eclipse JDT Core	fanIn,fanOut,noai	3	0.00177765
Eclipse PDE UI	dit,fanOut,nomi	3	0.00182221
single-version-ck-oo	fanOut,noc,nomi	3	0.00184458
Eclipse JDT Core	fanOut,noc,nomi	3	0.00184683
single-version-ck-oo	fanOut,noai,nomi	3	0.00185824
Eclipse JDT Core	fanOut,noai,nomi	3	0.00186115
single-version-ck-oo	fanIn,fanOut,noai	3	0.00190392
Eclipse PDE UI	dit,fanIn,fanOut	3	0.00196398
Eclipse JDT Core	dit,fanOut,nomi	3	0.00202528
single-version-ck-oo	fanIn,noai,nomi	3	0.0020554
Eclipse JDT Core	fanIn,noai,nomi	3	0.00206145
single-version-ck-oo	dit,fanOut,nomi	3	0.00209782
Mylyn	fanOut,noc,nomi	3	0.00211298
Eclipse JDT Core	fanOut,noc,noai	3	0.00211354
Eclipse JDT Core	dit,fanOut,noai	3	0.00217649
Eclipse PDE UI	fanIn,fanOut,noai	3	0.00218404
single-version-ck-oo	fanOut,noc,noai	3	0.00220302
single-version-ck-oo	dit,fanOut,noai	3	0.00220657
single-version-ck-oo	fanIn,noc,nomi	3	0.0023253
Eclipse JDT Core	dit,fanIn,nomi	3	0.00234283
single-version-ck-oo	dit,fanIn,nomi	3	0.00234645
Mylyn	fanOut,noai,nomi	3	0.00236799
Mylyn	dit,fanOut,nomi	3	0.0023737
single-version-ck-oo	dit,fanIn,fanOut	3	0.0023741
Eclipse JDT Core	dit,fanIn,fanOut	3	0.00240676
eclipse34_swt	dit,noai,nomi	3	0.00241281
Eclipse PDE UI	fanIn,noai,nomi	3	0.00246178
Eclipse PDE UI	dit,fanIn,nomi	3	0.00247495
Eclipse JDT Core	fanIn,noc,noai	3	0.00249201
single-version-ck-oo	dit,fanIn,noai	3	0.00251571
eclipse34_debug	IFANIN,nomi,noai	3	0.00253868	0.00291024
Lucene	fanIn,fanOut,nomi	3	0.00255817
Eclipse JDT Core	fanIn,noc,nomi	3	0.0025865
Eclipse PDE UI	fanIn,noc,nomi	3	0.00260523
eclipse34_swt	dit,noc,nomi	3	0.00264397
Mylyn	fanIn,noc,nomi	3	0.00266571
eclipse34_swt	noc,noai,nomi	3	0.00267973
Mylyn	dit,fanIn,nomi	3	0.00270589
Eclipse JDT Core	noc,noai,nomi	3	0.00271216
Mylyn	fanIn,fanOut,noai	3	0.00273014
Eclipse JDT Core	dit,fanIn,noai	3	0.00276794
Mylyn	fanIn,noai,nomi	3	0.00277088
Eclipse PDE UI	dit,fanOut,noai	3	0.0027828
Eclipse PDE UI	noc,noai,nomi	3	0.00278987
Mylyn	dit,fanIn,fanOut	3	0.00286356
single-version-ck-oo	noc,noai,nomi	3	0.0028785
Mylyn	fanIn,fanOut,noc	3	0.00293891
Eclipse JDT Core	fanIn,fanOut,noc	3	0.00299279
Eclipse PDE UI	fanIn,fanOut,noc	3	0.00300198
single-version-ck-oo	fanIn,fanOut,noc	3	0.00310502
Eclipse PDE UI	fanOut,noc,noai	3	0.00314186
eclipse34_swt	dit,IFANIN,nomi	3	0.00316718
single-version-ck-oo	fanIn,noc,noai	3	0.00325408
single-version-ck-oo	dit,noai,nomi	3	0.00326568
Eclipse JDT Core	dit,noai,nomi	3	0.00327131
eclipse34_swt	IFANIN,nomi,noai	3	0.00328181
churn	fanOut,noai,nomi	3	0.00331165	0.00237818
Eclipse JDT Core	dit,noc,nomi	3	0.00337193
churn	fanIn,fanOut,noai	3	0.00338572	0.00362157
churn	fanIn,noai,nomi	3	0.00340166	0.00290552
single-version-ck-oo	dit,noc,noai	3	0.0034019
single-version-ck-oo	dit,noc,nomi	3	0.00340511
single-version-ck-oo	dit,fanOut,noc	3	0.00348926	0.00503183
eclipse34_debug	dit,noc,nomi	3	0.00350931
eclipse34_debug	dit,noai,nomi	3	0.00351782
eclipse34_debug	dit,IFANIN,nomi	3	0.0035245	0.00334584
Eclipse JDT Core	dit,fanOut,noc	3	0.00357744
Eclipse PDE UI	dit,noc,nomi	3	0.00358504
Eclipse PDE UI	dit,fanOut,noc	3	0.00361542
ant-1	dit,mfa,noc	3	0.00367126	0.00577359
Lucene	fanOut,noc,nomi	3	0.00368464
churn	fanIn,fanOut,nomi	3	0.00371704	0.0019467
Eclipse PDE UI	dit,noai,nomi	3	0.00372247
Eclipse JDT Core	dit,noc,noai	3	0.00377743
Eclipse PDE UI	dit,fanIn,noai	3	0.00379972
xalan-2	dit,ic,mfa	3	0.0039436
xalan-2	ic,mfa,noc	3	0.00396919
eclipse34_debug	noc,noai,nomi	3	0.00397241
ant-1	ic,mfa,noc	3	0.00397564	0.00510269
eclipse34_debug	dit,noc,noai	3	0.00411229
Eclipse PDE UI	fanIn,noc,noai	3	0.00420181
Lucene	dit,fanIn,fanOut	3	0.0042191
Lucene	fanIn,noc,nomi	3	0.0042285
eclipse34_swt	IFANIN,noc,nomi	3	0.00427137
eclipse34_debug	IFANIN,noc,nomi	3	0.0043079	0.00428964
Lucene	fanIn,noai,nomi	3	0.00431692
eclipse34_swt	dit,noc,noai	3	0.00441119
Mylyn	dit,noc,nomi	3	0.00446761
Eclipse PDE UI	dit,fanIn,noc	3	0.00447561
xalan-2	dit,mfa,noc	3	0.00451171
Lucene	fanOut,noai,nomi	3	0.00459975
churn	fanOut,noc,noai	3	0.0046457	0.00416503
single-version-ck-oo	dit,fanIn,noc	3	0.00468144
Eclipse JDT Core	dit,fanIn,noc	3	0.00468322	0.0059048
Lucene	dit,fanIn,nomi	3	0.0047791
Mylyn	fanOut,noc,noai	3	0.00489231
Mylyn	noc,noai,nomi	3	0.00499307
Lucene	fanIn,fanOut,noai	3	0.00504381
Lucene	dit,fanOut,nomi	3	0.00508911
Mylyn	dit,fanOut,noai	3	0.00511156
churn	fanIn,noc,noai	3	0.0052151	0.00488576
Lucene	fanIn,fanOut,noc	3	0.00527392
churn	dit,fanOut,nomi	3	0.0053008	0.00923544
churn	noc,noai,nomi	3	0.00533842	0.0040526
Mylyn	dit,fanOut,noc	3	0.00534933
churn	dit,fanOut,noai	3	0.00536441	0.00404599
churn	fanOut,noc,nomi	3	0.00548922	0.00483265
Mylyn	dit,noai,nomi	3	0.00553478
churn	dit,noai,nomi	3	0.00585193	0.00435103
churn	fanIn,noc,nomi	3	0.0059014	0.00368423
churn	dit,fanIn,noai	3	0.00590564	0.00512564
Mylyn	fanIn,noc,noai	3	0.00590584
eclipse34_swt	dit,IFANIN,noai	3	0.0062644
churn	dit,fanIn,nomi	3	0.00630993	0.00412761
Mylyn	dit,fanIn,noc	3	0.00657253
Lucene	dit,fanOut,noai	3	0.0066341
Eclipse PDE UI	dit,noc,noai	3	0.00668224
eclipse34_swt	IFANIN,noc,noai	3	0.00685389
Lucene	noc,noai,nomi	3	0.0070566
prop-1	dit,ic,mfa	3	0.00709153
Mylyn	dit,fanIn,noai	3	0.00717157
Lucene	dit,noai,nomi	3	0.00723147
churn	fanIn,fanOut,noc	3	0.00727292	0.00521079
churn	dit,fanIn,fanOut	3	0.00764955	0.00482284
eclipse34_debug	dit,IFANIN,noai	3	0.00777032	0.00701736
Lucene	fanOut,noc,noai	3	0.00799378
Lucene	dit,noc,nomi	3	0.00822666
Lucene	fanIn,noc,noai	3	0.00824573
Lucene	dit,fanIn,noai	3	0.00859325
eclipse34_swt	dit,IFANIN,noc	3	0.00903406
Lucene	dit,fanIn,noc	3	0.00911119
Lucene	dit,fanOut,noc	3	0.00912773
churn	dit,noc,noai	3	0.00994045	0.00620535
churn	dit,noc,nomi	3	0.010381	0.00494883
eclipse34_debug	IFANIN,noc,noai	3	0.0109912	0.00892253
Mylyn	dit,noc,noai	3	0.011112
ant-1	dit,ic,mfa	3	0.012587	0.00666368
eclipse34_debug	dit,IFANIN,noc	3	0.0185485	0.0137913
prop-1	dit,ic,noc,mfa	4	0.000723343
Eclipse PDE UI	fanIn,fanOut,noc,nomi	4	0.00124177
Eclipse PDE UI	dit,fanIn,fanOut,nomi	4	0.00127442
Mylyn	fanIn,fanOut,noc,nomi	4	0.00128475
Eclipse PDE UI	fanIn,fanOut,noai,nomi	4	0.00128885
Mylyn	fanIn,fanOut,noai,nomi	4	0.00138342
Mylyn	dit,fanIn,fanOut,nomi	4	0.00138565
single-version-ck-oo	fanIn,fanOut,noai,nomi	4	0.00149658
Eclipse JDT Core	fanIn,fanOut,noai,nomi	4	0.00151014
single-version-ck-oo	fanIn,fanOut,noc,nomi	4	0.00151758
Eclipse JDT Core	fanIn,fanOut,noc,nomi	4	0.00152125
Eclipse JDT Core	dit,fanIn,fanOut,nomi	4	0.00152808
Eclipse PDE UI	fanOut,noc,noai,nomi	4	0.00153113
single-version-ck-oo	dit,fanIn,fanOut,nomi	4	0.00154468
Eclipse PDE UI	dit,fanIn,fanOut,noai	4	0.00159019
Eclipse PDE UI	dit,fanOut,noc,nomi	4	0.00159184
Eclipse JDT Core	dit,fanIn,fanOut,noai	4	0.00160792
eclipse34_swt	dit,noc,nomi,noai	4	0.00161777
Eclipse PDE UI	dit,fanOut,noai,nomi	4	0.00163413
single-version-ck-oo	dit,fanIn,fanOut,noai	4	0.0016641
Eclipse PDE UI	dit,fanIn,fanOut,noc	4	0.00169165
Eclipse JDT Core	fanIn,fanOut,noc,noai	4	0.00170658
single-version-ck-oo	fanOut,noc,noai,nomi	4	0.00170673
single-version-ck-oo	fanIn,fanOut,noc,noai	4	0.00171858
Eclipse JDT Core	fanOut,noc,noai,nomi	4	0.00175334
Eclipse JDT Core	dit,fanOut,noc,nomi	4	0.00179366
single-version-ck-oo	dit,fanOut,noc,nomi	4	0.00180079
single-version-ck-oo	fanIn,noai,noc,nomi	4	0.00184296	0.00324432
Eclipse PDE UI	fanIn,fanOut,noc,noai	4	0.00184402
Eclipse JDT Core	fanIn,noc,noai,nomi	4	0.00189413
Mylyn	dit,fanOut,noc,nomi	4	0.00189868
Mylyn	fanOut,noc,noai,nomi	4	0.00191298
Eclipse JDT Core	dit,fanOut,noc,noai	4	0.00193526
Eclipse JDT Core	dit,fanOut,noai,nomi	4	0.00195315
single-version-ck-oo	dit,fanOut,noc,noai	4	0.00197782
single-version-ck-oo	dit,fanIn,noai,nomi	4	0.00199035
Eclipse JDT Core	dit,fanIn,noai,nomi	4	0.00199408
single-version-ck-oo	dit,fanOut,noai,nomi	4	0.00200512
Eclipse JDT Core	dit,fanIn,noc,nomi	4	0.00202118
Eclipse PDE UI	dit,fanOut,noc,noai	4	0.00208529
single-version-ck-oo	dit,fanIn,fanOut,noc	4	0.0021071
Eclipse JDT Core	dit,fanIn,fanOut,noc	4	0.00210728
Mylyn	fanIn,fanOut,noc,noai	4	0.00213556
Eclipse PDE UI	dit,fanIn,noc,nomi	4	0.00213714
single-version-ck-oo	dit,fanIn,noc,nomi	4	0.002141
Mylyn	dit,fanIn,fanOut,noai	4	0.00216175
Mylyn	dit,fanOut,noai,nomi	4	0.00216204
Mylyn	fanIn,noc,noai,nomi	4	0.00216285
Eclipse JDT Core	dit,fanIn,noc,noai	4	0.00218169
Mylyn	dit,fanIn,noc,nomi	4	0.00220211
Mylyn	dit,fanIn,fanOut,noc	4	0.00225967
Eclipse PDE UI	fanIn,noc,noai,nomi	4	0.00230155
eclipse34_swt	dit,IFANIN,nomi,noai	4	0.00230832
single-version-ck-oo	dit,fanIn,noc,noai	4	0.00240445
eclipse34_swt	dit,IFANIN,noc,nomi	4	0.00241097
Lucene	fanIn,fanOut,noai,nomi	4	0.00242987
Eclipse PDE UI	dit,fanIn,noai,nomi	4	0.00243205
eclipse34_debug	dit,noc,nomi,noai	4	0.00244129	0.00202953
eclipse34_swt	IFANIN,noc,nomi,noai	4	0.00249115
single-version-ck-oo	dit,noc,noai,nomi	4	0.00251066
Eclipse JDT Core	dit,noc,noai,nomi	4	0.00251435
Mylyn	dit,fanIn,noai,nomi	4	0.00251716
churn	fanIn,fanOut,noai,nomi	4	0.00252974	0.00231519
Lucene	fanIn,fanOut,noc,nomi	4	0.00253686
Eclipse PDE UI	dit,noc,noai,nomi	4	0.00266831
Lucene	dit,fanIn,fanOut,nomi	4	0.00271662
eclipse34_debug	dit,IFANIN,noc,nomi	4	0.00277268	0.00259182
eclipse34_debug	dit,IFANIN,nomi,noai	4	0.0028043	0.00255631
eclipse34_debug	IFANIN,noc,nomi,noai	4	0.00291437	0.00270276
churn	fanOut,noc,noai,nomi	4	0.00298252	0.00355315
churn	fanIn,noc,noai,nomi	4	0.0031612
churn	dit,fanOut,noai,nomi	4	0.00326032	0.011298
Lucene	dit,fanOut,noc,nomi	4	0.00330651
churn	fanIn,fanOut,noc,noai	4	0.00331348	0.0025991
churn	dit,fanIn,fanOut,nomi	4	0.00332883	0.0344486
eclipse34_swt	dit,IFANIN,noc,noai	4	0.00341351
churn	dit,fanIn,noai,nomi	4	0.0034349	0.0133952
churn	fanIn,fanOut,noc,nomi	4	0.00345009	0.0267947
Eclipse PDE UI	dit,fanIn,noc,noai	4	0.00351264
Lucene	fanOut,noc,noai,nomi	4	0.00352265
Lucene	dit,fanIn,fanOut,noc	4	0.00353287
ant-1	dit,ic,noc,mfa	4	0.00353392	0.00659285
churn	dit,fanIn,fanOut,noai	4	0.00356159	0.00438649
Lucene	dit,fanIn,noc,nomi	4	0.00358439
Mylyn	dit,fanOut,noc,noai	4	0.00364166
Mylyn	dit,fanIn,noc,noai	4	0.00380498
Lucene	dit,fanIn,noai,nomi	4	0.00382706
Lucene	dit,fanOut,noai,nomi	4	0.00388639
Lucene	fanIn,noc,noai,nomi	4	0.0039007
Mylyn	dit,noc,noai,nomi	4	0.00397114
Lucene	dit,fanIn,fanOut,noai	4	0.00408753
xalan-2	dit,ic,noc,mfa	4	0.00409775
Lucene	fanIn,fanOut,noc,noai	4	0.00410107
churn	dit,fanOut,noc,noai	4	0.00461617	0.00538178
churn	dit,fanIn,noc,noai	4	0.00485885	0.00375739
churn	dit,noc,noai,nomi	4	0.00487056	0.00373031
churn	dit,fanOut,noc,nomi	4	0.00487442	0.00740976
churn	dit,fanIn,noc,nomi	4	0.00501199	0.00726221
Lucene	dit,fanOut,noc,noai	4	0.00574662
churn	dit,fanIn,fanOut,noc	4	0.00575723	0.00400418
Lucene	dit,fanIn,noc,noai	4	0.00578172
Lucene	dit,noc,noai,nomi	4	0.00584685
eclipse34_debug	dit,IFANIN,noc,noai	4	0.00964367	0.00652859
Eclipse PDE UI	fanIn,fanOut,noc,noai,nomi	5	0.00119613
Eclipse PDE UI	dit,fanIn,fanOut,noc,nomi	5	0.00122368
Mylyn	dit,fanIn,fanOut,noc,nomi	5	0.00122449
Mylyn	fanIn,fanOut,noc,noai,nomi	5	0.00122845
Eclipse PDE UI	dit,fanIn,fanOut,noai,nomi	5	0.00127141
Mylyn	dit,fanIn,fanOut,noai,nomi	5	0.00138364
single-version-ck-oo	dit,fanIn,fanOut,noai,nomi	5	0.00141955
single-version-ck-oo	fanIn,fanOut,noc,noai,nomi	5	0.00145378
Eclipse JDT Core	fanIn,fanOut,noc,noai,nomi	5	0.00145662
Eclipse PDE UI	dit,fanOut,noc,noai,nomi	5	0.00146318
Eclipse JDT Core	dit,fanIn,fanOut,noai,nomi	5	0.00147238
Eclipse PDE UI	dit,fanIn,fanOut,noc,noai	5	0.00148304
single-version-ck-oo	dit,fanIn,fanOut,noc,nomi	5	0.00150597
Eclipse JDT Core	dit,fanIn,fanOut,noc,nomi	5	0.00153607
single-version-ck-oo	dit,fanIn,fanOut,noc,noai	5	0.0015416
Eclipse JDT Core	dit,fanIn,fanOut,noc,noai	5	0.00159204
single-version-ck-oo	dit,fanOut,noc,noai,nomi	5	0.00164288
eclipse34_swt	dit,IFANIN,noc,nomi,noai	5	0.00165527
Eclipse JDT Core	dit,fanOut,noc,noai,nomi	5	0.00171317
Mylyn	dit,fanIn,fanOut,noc,noai	5	0.00180375
Eclipse JDT Core	dit,fanIn,noc,noai,nomi	5	0.00181797
Mylyn	dit,fanOut,noc,noai,nomi	5	0.00183846
Eclipse PDE UI	dit,fanIn,noc,noai,nomi	5	0.0019142
single-version-ck-oo	dit,fanIn,noc,noai,nomi	5	0.00195796
Mylyn	dit,fanIn,noc,noai,nomi	5	0.00205805
eclipse34_debug	dit,IFANIN,noc,nomi,noai	5	0.00217908	0.00191718
Lucene	fanIn,fanOut,noc,noai,nomi	5	0.00244825
Lucene	dit,fanIn,fanOut,noc,nomi	5	0.00246238
churn	fanIn,fanOut,noc,noai,nomi	5	0.00253402	0.00222405
churn	dit,fanIn,fanOut,noai,nomi	5	0.00255933	0.00236345
churn	dit,fanOut,noc,noai,nomi	5	0.00297021	0.00366456
Lucene	dit,fanIn,fanOut,noai,nomi	5	0.00307174
Lucene	dit,fanIn,fanOut,noc,noai	5	0.00311642
churn	dit,fanIn,fanOut,noc,nomi	5	0.0031574	0.00234658
churn	dit,fanIn,fanOut,noc,noai	5	0.00320429	0.00298106
churn	dit,fanIn,noc,noai,nomi	5	0.00330285	0.00329873
Lucene	dit,fanIn,noc,noai,nomi	5	0.00346388
Lucene	dit,fanOut,noc,noai,nomi	5	0.00354875
Eclipse PDE UI	dit,fanIn,fanOut,noc,noai,nomi	6	0.00118132
Mylyn	dit,fanIn,fanOut,noc,noai,nomi	6	0.00122464
Eclipse JDT Core	dit,fanIn,fanOut,noc,noai,nomi	6	0.00149514
single-version-ck-oo	dit,fanIn,fanOut,noc,noai,nomi	6	0.00150725
churn	dit,fanIn,fanOut,noc,noai,nomi	6	0.0024409	0.00221739
Lucene	dit,fanIn,fanOut,noc,noai,nomi	6	0.00260728

## Sheet: Conclusion
featuresset	n	average	count	t-test		featuresset	n	Errors	average		Feature wise conculsion
mfa	1	0.00748334	5	0.680786		mfa	1	0.0132565	0.00748334		N Feature	# sets	Feature set	average
nomi	1	0.00850767	3	0.22562		mfa	1	0.00876104			1	5	mfa	0.00748334
noai	1	0.00915982	2			mfa	1	0.00242254			2	7	fanOut,nomi	0.00416124
fanOut,nomi	2	0.00416124	7	0.742226		mfa	1	0.00671547			3	7	fanIn,fanOut,nomi	0.0019467
noc,mfa	2	0.00462181	5	0.958216		mfa	1	0.00626112			4	2	dit,noc,nomi,noai	0.00202953
fanOut,noai	2	0.00469632	5	0.994183		noai	1	0.00937104	0.00915982		5	2	dit,IFANIN,noc,nomi,noai	0.00191718
fanIn,nomi	2	0.00470589	7			noai	1	0.0089486			6	7	dit,fanIn,fanOut,noc,noai,nomi	0.00221739
dit,mfa	2	0.00511336	5			nomi	1	0.008749	0.00850767
ic,mfa	2	0.00563833	6			nomi	1	0.00887959			Overall
fanIn,fanOut	2	0.00580426	8			nomi	1	0.00789442			5	2	dit,IFANIN,noc,nomi,noai	0.00191718
noc,nomi	2	0.00580577	7			dit,fanIn	2	0.0087158	0.00918689		3	7	fanIn,fanOut,nomi	0.0019467
noai,nomi	2	0.00600452	8			dit,fanIn	2	0.00731683			4	2	dit,noc,nomi,noai	0.00202953
dit,nomi	2	0.00660643	6			dit,fanIn	2	0.0121958			6	7	dit,fanIn,fanOut,noc,noai,nomi	0.00221739
fanIn,noai	2	0.0067331	6			dit,fanIn	2	0.00851909			5	7	fanIn,fanOut,noc,noai,nomi	0.00222405
fanOut,noc	2	0.00753571	4			dit,fanOut	2	0.00660297	0.00784048		4	7	fanIn,fanOut,noai,nomi	0.00231519
noc,noai	2	0.00780015	5			dit,fanOut	2	0.00725111			5	7	dit,fanIn,fanOut,noc,nomi	0.00234658
dit,fanOut	2	0.00784048	4			dit,fanOut	2	0.0106661			5	7	dit,fanIn,fanOut,noai,nomi	0.00236345
dit,noai	2	0.00825749	5			dit,fanOut	2	0.00684173			3	7	fanOut,noai,nomi	0.00237818
fanIn,noc	2	0.00880742	4			dit,mfa	2	0.00428327	0.00511336		4	2	dit,IFANIN,nomi,noai	0.00255631
dit,fanIn	2	0.00918689	4			dit,mfa	2	0.00962118			4	2	dit,IFANIN,noc,nomi	0.00259182
IFANIN,nomi	2	0.0101481	2			dit,mfa	2	0.00125003			4	7	fanIn,fanOut,noc,noai	0.0025991
dit,noc	2	0.0109257	2			dit,mfa	2	0.00567885			4	2	IFANIN,noc,nomi,noai	0.00270276
fanIn,fanOut,nomi	3	0.0019467	7	0.465193		dit,mfa	2	0.00473347			T-TEST
fanOut,noai,nomi	3	0.00237818	7	0.36158		dit,noai	2	0.0115947	0.00825749			featuresset	n	average	count	t-test
fanIn,noai,nomi	3	0.00290552	7			dit,noai	2	0.00508698				mfa	1	0.00748334	5	0.680786
IFANIN,nomi,noai	3	0.00291024	2			dit,noai	2	0.0120015				nomi	1	0.00850767	3	0.22562
dit,IFANIN,nomi	3	0.00334584	2			dit,noai	2	0.00756076				noai	1	0.00915982	2
fanIn,fanOut,noai	3	0.00362157	7			dit,noai	2	0.0050435				fanOut,nomi	2	0.00416124	7	0.742226
fanIn,noc,nomi	3	0.00368423	7			dit,noc	2	0.0115531	0.0109257			noc,mfa	2	0.00462181	5	0.958216
dit,fanOut,noai	3	0.00404599	6			dit,noc	2	0.0102983				fanOut,noai	2	0.00469632	5	0.994183
noc,noai,nomi	3	0.0040526	8			dit,nomi	2	0.00503678	0.00660643			fanIn,nomi	2	0.00470589	7
dit,fanIn,nomi	3	0.00412761	7			dit,nomi	2	0.00472669				fanIn,fanOut,nomi	3	0.0019467	7	0.465193
fanOut,noc,noai	3	0.00416503	6			dit,nomi	2	0.00607524				fanOut,noai,nomi	3	0.00237818	7	0.36158
IFANIN,noc,nomi	3	0.00428964	2			dit,nomi	2	0.00407756				fanIn,noai,nomi	3	0.00290552	7
dit,noai,nomi	3	0.00435103	8			dit,nomi	2	0.00712489				dit,noc,nomi,noai	4	0.00202953	2	0.0853208
dit,fanIn,fanOut	3	0.00482284	7			dit,nomi	2	0.0125974				fanIn,fanOut,noai,nomi	4	0.00231519	7	0.83767
fanOut,noc,nomi	3	0.00483265	7			fanIn,fanOut	2	0.00900952	0.00580426			dit,IFANIN,nomi,noai	4	0.00255631	2
fanIn,noc,noai	3	0.00488576	6			fanIn,fanOut	2	0.00437949				dit,IFANIN,noc,nomi,noai	5	0.00191718	2	0.784324
dit,noc,nomi	3	0.00494883	8			fanIn,fanOut	2	0.00412144				fanIn,fanOut,noc,noai,nomi	5	0.00222405	7	0.87863
dit,fanOut,noc	3	0.00503183	5			fanIn,fanOut	2	0.00697587				dit,fanIn,fanOut,noc,nomi	5	0.00234658	7
ic,mfa,noc	3	0.00510269	6			fanIn,fanOut	2	0.00779091
dit,fanIn,noai	3	0.00512564	6			fanIn,fanOut	2	0.00404648
fanIn,fanOut,noc	3	0.00521079	7			fanIn,fanOut	2	0.00431708
dit,mfa,noc	3	0.00577359	6			fanIn,noai	2	0.00579332	0.0067331
dit,fanIn,noc	3	0.0059048	5			fanIn,noai	2	0.00322636
dit,noc,noai	3	0.00620535	7			fanIn,noai	2	0.00639305
dit,ic,mfa	3	0.00666368	7			fanIn,noai	2	0.0117057
dit,IFANIN,noai	3	0.00701736	2			fanIn,noai	2	0.00990764
IFANIN,noc,noai	3	0.00892253	2			fanIn,noai	2	0.00337252
dit,fanOut,nomi	3	0.00923544	7			fanIn,noc	2	0.00873218	0.00880742
dit,IFANIN,noc	3	0.0137913	2			fanIn,noc	2	0.00835068
dit,noc,nomi,noai	4	0.00202953	2	0.0853208		fanIn,noc	2	0.00986007
fanIn,fanOut,noai,nomi	4	0.00231519	7	0.83767		fanIn,noc	2	0.00828675
dit,IFANIN,nomi,noai	4	0.00255631	2			fanIn,nomi	2	0.00742509	0.00470589
dit,IFANIN,noc,nomi	4	0.00259182	2			fanIn,nomi	2	0.00282081
fanIn,fanOut,noc,noai	4	0.0025991	7			fanIn,nomi	2	0.00293568
IFANIN,noc,nomi,noai	4	0.00270276	2			fanIn,nomi	2	0.00756337
fanIn,noai,noc,nomi	4	0.00324432	7			fanIn,nomi	2	0.00589605
fanOut,noc,noai,nomi	4	0.00355315	7			fanIn,nomi	2	0.00349446
dit,noc,noai,nomi	4	0.00373031	6			fanIn,nomi	2	0.00280575
dit,fanIn,noc,noai	4	0.00375739	6			fanOut,noai	2	0.00558575	0.00469632
dit,fanIn,fanOut,noc	4	0.00400418	7			fanOut,noai	2	0.00274408
dit,fanIn,fanOut,noai	4	0.00438649	7			fanOut,noai	2	0.0045713
dit,fanOut,noc,noai	4	0.00538178	7			fanOut,noai	2	0.0079061
dit,IFANIN,noc,noai	4	0.00652859	2			fanOut,noai	2	0.0026744
dit,ic,noc,mfa	4	0.00659285	6			fanOut,noc	2	0.00717241	0.00753571
dit,fanIn,noc,nomi	4	0.00726221	7			fanOut,noc	2	0.00782366
dit,fanOut,noc,nomi	4	0.00740976	7			fanOut,noc	2	0.00804675
dit,fanOut,noai,nomi	4	0.011298	7			fanOut,noc	2	0.00710003
dit,fanIn,noai,nomi	4	0.0133952	7			fanOut,nomi	2	0.00705683	0.00416124
fanIn,fanOut,noc,nomi	4	0.0267947	7			fanOut,nomi	2	0.00218486
dit,fanIn,fanOut,nomi	4	0.0344486	7			fanOut,nomi	2	0.00212879
dit,IFANIN,noc,nomi,noai	5	0.00191718	2	0.784324		fanOut,nomi	2	0.00759361
fanIn,fanOut,noc,noai,nomi	5	0.00222405	7	0.87863		fanOut,nomi	2	0.00520355
dit,fanIn,fanOut,noc,nomi	5	0.00234658	7			fanOut,nomi	2	0.0027753
dit,fanIn,fanOut,noai,nomi	5	0.00236345	7			fanOut,nomi	2	0.00218573
dit,fanIn,fanOut,noc,noai	5	0.00298106	7			ic,mfa	2	0.00388979	0.00563833
dit,fanIn,noc,noai,nomi	5	0.00329873	7			ic,mfa	2	0.00595021
dit,fanOut,noc,noai,nomi	5	0.00366456	7			ic,mfa	2	0.00720179
dit,fanIn,fanOut,noc,noai,nomi	6	0.00221739	7			ic,mfa	2	0.0112156
						ic,mfa	2	0.00115577
						ic,mfa	2	0.00441678
						IFANIN,nomi	2	0.00972021	0.0101481
						IFANIN,nomi	2	0.0105759
						noai,nomi	2	0.00655205	0.00600452
						noai,nomi	2	0.00419878
						noai,nomi	2	0.00393733
						noai,nomi	2	0.00951586
						noai,nomi	2	0.00868084
						noai,nomi	2	0.00351251
						noai,nomi	2	0.0077801
						noai,nomi	2	0.00385868
						noc,mfa	2	0.00433136	0.00462181
						noc,mfa	2	0.00707806
						noc,mfa	2	0.00123457
						noc,mfa	2	0.00580384
						noc,mfa	2	0.00466123
						noc,noai	2	0.0106586	0.00780015
						noc,noai	2	0.00529512
						noc,noai	2	0.00859909
						noc,noai	2	0.00965632
						noc,noai	2	0.00479158
						noc,nomi	2	0.00453185	0.00580577
						noc,nomi	2	0.00481589
						noc,nomi	2	0.00551831
						noc,nomi	2	0.00506917
						noc,nomi	2	0.00944713
						noc,nomi	2	0.00678361
						noc,nomi	2	0.00447439
						dit,fanIn,fanOut	3	0.00764955	0.00482284
						dit,fanIn,fanOut	3	0.00240676
						dit,fanIn,fanOut	3	0.00196398
						dit,fanIn,fanOut	3	0.0122828
						dit,fanIn,fanOut	3	0.0042191
						dit,fanIn,fanOut	3	0.00286356
						dit,fanIn,fanOut	3	0.0023741
						dit,fanIn,noai	3	0.00590564	0.00512564
						dit,fanIn,noai	3	0.00276794
						dit,fanIn,noai	3	0.00379972
						dit,fanIn,noai	3	0.00859325
						dit,fanIn,noai	3	0.00717157
						dit,fanIn,noai	3	0.00251571
						dit,fanIn,noc	3	0.00468322	0.0059048
						dit,fanIn,noc	3	0.00447561
						dit,fanIn,noc	3	0.00911119
						dit,fanIn,noc	3	0.00657253
						dit,fanIn,noc	3	0.00468144
						dit,fanIn,nomi	3	0.00630993	0.00412761
						dit,fanIn,nomi	3	0.00234283
						dit,fanIn,nomi	3	0.00247495
						dit,fanIn,nomi	3	0.00793412
						dit,fanIn,nomi	3	0.0047791
						dit,fanIn,nomi	3	0.00270589
						dit,fanIn,nomi	3	0.00234645
						dit,fanOut,noai	3	0.00536441	0.00404599
						dit,fanOut,noai	3	0.00217649
						dit,fanOut,noai	3	0.0027828
						dit,fanOut,noai	3	0.0066341
						dit,fanOut,noai	3	0.00511156
						dit,fanOut,noai	3	0.00220657
						dit,fanOut,noc	3	0.00348926	0.00503183
						dit,fanOut,noc	3	0.00357744
						dit,fanOut,noc	3	0.00361542
						dit,fanOut,noc	3	0.00912773
						dit,fanOut,noc	3	0.00534933
						dit,fanOut,nomi	3	0.0053008	0.00923544
						dit,fanOut,nomi	3	0.00202528
						dit,fanOut,nomi	3	0.00182221
						dit,fanOut,nomi	3	0.0459391
						dit,fanOut,nomi	3	0.00508911
						dit,fanOut,nomi	3	0.0023737
						dit,fanOut,nomi	3	0.00209782
						dit,ic,mfa	3	0.012587	0.00666368
						dit,ic,mfa	3	0.00569224
						dit,ic,mfa	3	0.00630327
						dit,ic,mfa	3	0.010145
						dit,ic,mfa	3	0.000883099
						dit,ic,mfa	3	0.0039436
						dit,ic,mfa	3	0.00709153
						dit,IFANIN,noai	3	0.00777032	0.00701736
						dit,IFANIN,noai	3	0.0062644
						dit,IFANIN,noc	3	0.0185485	0.0137913
						dit,IFANIN,noc	3	0.00903406
						dit,IFANIN,nomi	3	0.0035245	0.00334584
						dit,IFANIN,nomi	3	0.00316718
						dit,mfa,noc	3	0.00367126	0.00577359
						dit,mfa,noc	3	0.00722613
						dit,mfa,noc	3	0.0133022
						dit,mfa,noc	3	0.00088743
						dit,mfa,noc	3	0.0050428
						dit,mfa,noc	3	0.00451171
						dit,noai,nomi	3	0.00585193	0.00435103
						dit,noai,nomi	3	0.00327131
						dit,noai,nomi	3	0.00372247
						dit,noai,nomi	3	0.00723147
						dit,noai,nomi	3	0.00553478
						dit,noai,nomi	3	0.00326568
						dit,noai,nomi	3	0.00351782
						dit,noai,nomi	3	0.00241281
						dit,noc,noai	3	0.00994045	0.00620535
						dit,noc,noai	3	0.00377743
						dit,noc,noai	3	0.00668224
						dit,noc,noai	3	0.00411229
						dit,noc,noai	3	0.00441119
						dit,noc,noai	3	0.011112
						dit,noc,noai	3	0.0034019
						dit,noc,nomi	3	0.010381	0.00494883
						dit,noc,nomi	3	0.00337193
						dit,noc,nomi	3	0.00358504
						dit,noc,nomi	3	0.00350931
						dit,noc,nomi	3	0.00264397
						dit,noc,nomi	3	0.00822666
						dit,noc,nomi	3	0.00446761
						dit,noc,nomi	3	0.00340511
						fanIn,fanOut,noai	3	0.00338572	0.00362157
						fanIn,fanOut,noai	3	0.00177765
						fanIn,fanOut,noai	3	0.00218404
						fanIn,fanOut,noai	3	0.00832568
						fanIn,fanOut,noai	3	0.00504381
						fanIn,fanOut,noai	3	0.00273014
						fanIn,fanOut,noai	3	0.00190392
						fanIn,fanOut,noc	3	0.00727292	0.00521079
						fanIn,fanOut,noc	3	0.00299279
						fanIn,fanOut,noc	3	0.00300198
						fanIn,fanOut,noc	3	0.01189
						fanIn,fanOut,noc	3	0.00527392
						fanIn,fanOut,noc	3	0.00293891
						fanIn,fanOut,noc	3	0.00310502
						fanIn,fanOut,nomi	3	0.00371704	0.0019467
						fanIn,fanOut,nomi	3	0.00171658
						fanIn,fanOut,nomi	3	0.00136682
						fanIn,fanOut,nomi	3	0.00123964
						fanIn,fanOut,nomi	3	0.00255817
						fanIn,fanOut,nomi	3	0.00144258
						fanIn,fanOut,nomi	3	0.00158605
						fanIn,noai,nomi	3	0.00340166	0.00290552
						fanIn,noai,nomi	3	0.00206145
						fanIn,noai,nomi	3	0.00246178
						fanIn,noai,nomi	3	0.00327056
						fanIn,noai,nomi	3	0.00431692
						fanIn,noai,nomi	3	0.00277088
						fanIn,noai,nomi	3	0.0020554
						fanIn,noc,noai	3	0.0052151	0.00488576
						fanIn,noc,noai	3	0.00249201
						fanIn,noc,noai	3	0.00420181
						fanIn,noc,noai	3	0.00824573
						fanIn,noc,noai	3	0.00590584
						fanIn,noc,noai	3	0.00325408
						fanIn,noc,nomi	3	0.0059014	0.00368423
						fanIn,noc,nomi	3	0.0025865
						fanIn,noc,nomi	3	0.00260523
						fanIn,noc,nomi	3	0.00547697
						fanIn,noc,nomi	3	0.0042285
						fanIn,noc,nomi	3	0.00266571
						fanIn,noc,nomi	3	0.0023253
						fanOut,noai,nomi	3	0.00331165	0.00237818
						fanOut,noai,nomi	3	0.00186115
						fanOut,noai,nomi	3	0.00176832
						fanOut,noai,nomi	3	0.000880152
						fanOut,noai,nomi	3	0.00459975
						fanOut,noai,nomi	3	0.00236799
						fanOut,noai,nomi	3	0.00185824
						fanOut,noc,noai	3	0.0046457	0.00416503
						fanOut,noc,noai	3	0.00211354
						fanOut,noc,noai	3	0.00314186
						fanOut,noc,noai	3	0.00799378
						fanOut,noc,noai	3	0.00489231
						fanOut,noc,noai	3	0.00220302
						fanOut,noc,nomi	3	0.00548922	0.00483265
						fanOut,noc,nomi	3	0.00184683
						fanOut,noc,nomi	3	0.00172567
						fanOut,noc,nomi	3	0.0171246
						fanOut,noc,nomi	3	0.00368464
						fanOut,noc,nomi	3	0.00211298
						fanOut,noc,nomi	3	0.00184458
						ic,mfa,noc	3	0.00397564	0.00510269
						ic,mfa,noc	3	0.00531597
						ic,mfa,noc	3	0.00634834
						ic,mfa,noc	3	0.0101391
						ic,mfa,noc	3	0.000867884
						ic,mfa,noc	3	0.00396919
						IFANIN,noc,noai	3	0.0109912	0.00892253
						IFANIN,noc,noai	3	0.00685389
						IFANIN,noc,nomi	3	0.0043079	0.00428964
						IFANIN,noc,nomi	3	0.00427137
						IFANIN,nomi,noai	3	0.00253868	0.00291024
						IFANIN,nomi,noai	3	0.00328181
						noc,noai,nomi	3	0.00533842	0.0040526
						noc,noai,nomi	3	0.00271216
						noc,noai,nomi	3	0.00278987
						noc,noai,nomi	3	0.0070566
						noc,noai,nomi	3	0.00499307
						noc,noai,nomi	3	0.0028785
						noc,noai,nomi	3	0.00397241
						noc,noai,nomi	3	0.00267973
						dit,fanIn,fanOut,noai	4	0.00356159	0.00438649
						dit,fanIn,fanOut,noai	4	0.00160792
						dit,fanIn,fanOut,noai	4	0.00159019
						dit,fanIn,fanOut,noai	4	0.0160323
						dit,fanIn,fanOut,noai	4	0.00408753
						dit,fanIn,fanOut,noai	4	0.00216175
						dit,fanIn,fanOut,noai	4	0.0016641
						dit,fanIn,fanOut,noc	4	0.00575723	0.00400418
						dit,fanIn,fanOut,noc	4	0.0021071
						dit,fanIn,fanOut,noc	4	0.00210728
						dit,fanIn,fanOut,noc	4	0.00169165
						dit,fanIn,fanOut,noc	4	0.0105735
						dit,fanIn,fanOut,noc	4	0.00353287
						dit,fanIn,fanOut,noc	4	0.00225967
						dit,fanIn,fanOut,nomi	4	0.00332883	0.0344486
						dit,fanIn,fanOut,nomi	4	0.00152808
						dit,fanIn,fanOut,nomi	4	0.00127442
						dit,fanIn,fanOut,nomi	4	0.229362
						dit,fanIn,fanOut,nomi	4	0.00271662
						dit,fanIn,fanOut,nomi	4	0.00138565
						dit,fanIn,fanOut,nomi	4	0.00154468
						dit,fanIn,noai,nomi	4	0.0034349	0.0133952
						dit,fanIn,noai,nomi	4	0.00199408
						dit,fanIn,noai,nomi	4	0.00243205
						dit,fanIn,noai,nomi	4	0.077571
						dit,fanIn,noai,nomi	4	0.00382706
						dit,fanIn,noai,nomi	4	0.00251716
						dit,fanIn,noai,nomi	4	0.00199035
						dit,fanIn,noc,noai	4	0.00485885	0.00375739
						dit,fanIn,noc,noai	4	0.00218169
						dit,fanIn,noc,noai	4	0.00351264
						dit,fanIn,noc,noai	4	0.00578172
						dit,fanIn,noc,noai	4	0.00380498
						dit,fanIn,noc,noai	4	0.00240445
						dit,fanIn,noc,nomi	4	0.00501199	0.00726221
						dit,fanIn,noc,nomi	4	0.00202118
						dit,fanIn,noc,nomi	4	0.00213714
						dit,fanIn,noc,nomi	4	0.0337377
						dit,fanIn,noc,nomi	4	0.00358439
						dit,fanIn,noc,nomi	4	0.00220211
						dit,fanIn,noc,nomi	4	0.002141
						dit,fanOut,noai,nomi	4	0.00326032	0.011298
						dit,fanOut,noai,nomi	4	0.00195315
						dit,fanOut,noai,nomi	4	0.00163413
						dit,fanOut,noai,nomi	4	0.0641849
						dit,fanOut,noai,nomi	4	0.00388639
						dit,fanOut,noai,nomi	4	0.00216204
						dit,fanOut,noai,nomi	4	0.00200512
						dit,fanOut,noc,noai	4	0.00461617	0.00538178
						dit,fanOut,noc,noai	4	0.00193526
						dit,fanOut,noc,noai	4	0.00208529
						dit,fanOut,noc,noai	4	0.0176696
						dit,fanOut,noc,noai	4	0.00574662
						dit,fanOut,noc,noai	4	0.00364166
						dit,fanOut,noc,noai	4	0.00197782
						dit,fanOut,noc,nomi	4	0.00487442	0.00740976
						dit,fanOut,noc,nomi	4	0.00179366
						dit,fanOut,noc,nomi	4	0.00159184
						dit,fanOut,noc,nomi	4	0.0366024
						dit,fanOut,noc,nomi	4	0.00330651
						dit,fanOut,noc,nomi	4	0.00189868
						dit,fanOut,noc,nomi	4	0.00180079
						dit,ic,noc,mfa	4	0.00353392	0.00659285
						dit,ic,noc,mfa	4	0.0159337
						dit,ic,noc,mfa	4	0.00581312
						dit,ic,noc,mfa	4	0.00945522
						dit,ic,noc,mfa	4	0.000723343
						dit,ic,noc,mfa	4	0.00409775
						dit,IFANIN,noc,noai	4	0.00964367	0.00652859
						dit,IFANIN,noc,noai	4	0.00341351
						dit,IFANIN,noc,nomi	4	0.00277268	0.00259182
						dit,IFANIN,noc,nomi	4	0.00241097
						dit,IFANIN,nomi,noai	4	0.0028043	0.00255631
						dit,IFANIN,nomi,noai	4	0.00230832
						dit,noc,noai,nomi	4	0.00487056	0.00373031
						dit,noc,noai,nomi	4	0.00251435
						dit,noc,noai,nomi	4	0.00266831
						dit,noc,noai,nomi	4	0.00584685
						dit,noc,noai,nomi	4	0.00397114
						dit,noc,noai,nomi	4	0.00251066
						dit,noc,nomi,noai	4	0.00244129	0.00202953
						dit,noc,nomi,noai	4	0.00161777
						fanIn,fanOut,noai,nomi	4	0.00252974	0.00231519
						fanIn,fanOut,noai,nomi	4	0.00151014
						fanIn,fanOut,noai,nomi	4	0.00128885
						fanIn,fanOut,noai,nomi	4	0.00556774
						fanIn,fanOut,noai,nomi	4	0.00242987
						fanIn,fanOut,noai,nomi	4	0.00138342
						fanIn,fanOut,noai,nomi	4	0.00149658
						fanIn,fanOut,noc,noai	4	0.00331348	0.0025991
						fanIn,fanOut,noc,noai	4	0.00170658
						fanIn,fanOut,noc,noai	4	0.00184402
						fanIn,fanOut,noc,noai	4	0.00337445
						fanIn,fanOut,noc,noai	4	0.00410107
						fanIn,fanOut,noc,noai	4	0.00213556
						fanIn,fanOut,noc,noai	4	0.00171858
						fanIn,fanOut,noc,nomi	4	0.00345009	0.0267947
						fanIn,fanOut,noc,nomi	4	0.00152125
						fanIn,fanOut,noc,nomi	4	0.00124177
						fanIn,fanOut,noc,nomi	4	0.176011
						fanIn,fanOut,noc,nomi	4	0.00253686
						fanIn,fanOut,noc,nomi	4	0.00128475
						fanIn,fanOut,noc,nomi	4	0.00151758
						fanIn,noai,noc,nomi	4	0.00184296	0.00324432
						fanIn,noc,noai,nomi	4	0.0031612
						fanIn,noc,noai,nomi	4	0.00189413
						fanIn,noc,noai,nomi	4	0.00230155
						fanIn,noc,noai,nomi	4	0.00744684
						fanIn,noc,noai,nomi	4	0.0039007
						fanIn,noc,noai,nomi	4	0.00216285
						fanOut,noc,noai,nomi	4	0.00298252	0.00355315
						fanOut,noc,noai,nomi	4	0.00175334
						fanOut,noc,noai,nomi	4	0.00153113
						fanOut,noc,noai,nomi	4	0.0114627
						fanOut,noc,noai,nomi	4	0.00352265
						fanOut,noc,noai,nomi	4	0.00191298
						fanOut,noc,noai,nomi	4	0.00170673
						IFANIN,noc,nomi,noai	4	0.00291437	0.00270276
						IFANIN,noc,nomi,noai	4	0.00249115
						dit,fanIn,fanOut,noai,nomi	5	0.00255933	0.00236345
						dit,fanIn,fanOut,noai,nomi	5	0.00147238
						dit,fanIn,fanOut,noai,nomi	5	0.00127141
						dit,fanIn,fanOut,noai,nomi	5	0.00536611
						dit,fanIn,fanOut,noai,nomi	5	0.00307174
						dit,fanIn,fanOut,noai,nomi	5	0.00138364
						dit,fanIn,fanOut,noai,nomi	5	0.00141955
						dit,fanIn,fanOut,noc,noai	5	0.00320429	0.00298106
						dit,fanIn,fanOut,noc,noai	5	0.00159204
						dit,fanIn,fanOut,noc,noai	5	0.00148304
						dit,fanIn,fanOut,noc,noai	5	0.00812627
						dit,fanIn,fanOut,noc,noai	5	0.00311642
						dit,fanIn,fanOut,noc,noai	5	0.00180375
						dit,fanIn,fanOut,noc,noai	5	0.0015416
						dit,fanIn,fanOut,noc,nomi	5	0.0031574	0.00234658
						dit,fanIn,fanOut,noc,nomi	5	0.00153607
						dit,fanIn,fanOut,noc,nomi	5	0.00122368
						dit,fanIn,fanOut,noc,nomi	5	0.00531609
						dit,fanIn,fanOut,noc,nomi	5	0.00246238
						dit,fanIn,fanOut,noc,nomi	5	0.00122449
						dit,fanIn,fanOut,noc,nomi	5	0.00150597
						dit,fanIn,noc,noai,nomi	5	0.00330285	0.00329873
						dit,fanIn,noc,noai,nomi	5	0.00181797
						dit,fanIn,noc,noai,nomi	5	0.0019142
						dit,fanIn,noc,noai,nomi	5	0.00857621
						dit,fanIn,noc,noai,nomi	5	0.00346388
						dit,fanIn,noc,noai,nomi	5	0.00205805
						dit,fanIn,noc,noai,nomi	5	0.00195796
						dit,fanOut,noc,noai,nomi	5	0.00297021	0.00366456
						dit,fanOut,noc,noai,nomi	5	0.00171317
						dit,fanOut,noc,noai,nomi	5	0.00146318
						dit,fanOut,noc,noai,nomi	5	0.0124753
						dit,fanOut,noc,noai,nomi	5	0.00354875
						dit,fanOut,noc,noai,nomi	5	0.00183846
						dit,fanOut,noc,noai,nomi	5	0.00164288
						dit,IFANIN,noc,nomi,noai	5	0.00217908	0.00191718
						dit,IFANIN,noc,nomi,noai	5	0.00165527
						fanIn,fanOut,noc,noai,nomi	5	0.00253402	0.00222405
						fanIn,fanOut,noc,noai,nomi	5	0.00145662
						fanIn,fanOut,noc,noai,nomi	5	0.00119613
						fanIn,fanOut,noc,noai,nomi	5	0.00525112
						fanIn,fanOut,noc,noai,nomi	5	0.00244825
						fanIn,fanOut,noc,noai,nomi	5	0.00122845
						fanIn,fanOut,noc,noai,nomi	5	0.00145378
						dit,fanIn,fanOut,noc,noai,nomi	6	0.0024409	0.00221739
						dit,fanIn,fanOut,noc,noai,nomi	6	0.00149514
						dit,fanIn,fanOut,noc,noai,nomi	6	0.00118132
						dit,fanIn,fanOut,noc,noai,nomi	6	0.00506521
						dit,fanIn,fanOut,noc,noai,nomi	6	0.00260728
						dit,fanIn,fanOut,noc,noai,nomi	6	0.00122464
						dit,fanIn,fanOut,noc,noai,nomi	6	0.00150725

## Sheet: table-calculation
Data sets	All	Datasets	Large	Datasets	Balance	Small Datasets	skewd	Remaining
dit	5					5	0	0
dit ,noai	6	dit ,noai	3	dit ,noai	3	3	0	3
dit ,noai,nomi	6	dit ,noai,nomi	5	dit ,noai,nomi	5	1	0	5
dit ,nomi	6	dit ,nomi	4	dit ,nomi	4	2	0	4
dit,fanIn	6	dit,fanIn	3	dit,fanIn	3	3	0	3
dit,fanIn ,noai	6	dit,fanIn ,noai	5	dit,fanIn ,noai	5	1	0	5
dit,fanIn ,noai,nomi	6	dit,fanIn ,noai,nomi	6	dit,fanIn ,noai,nomi	6	0	0	6
dit,fanIn ,nomi	6	dit,fanIn ,nomi	6	dit,fanIn ,nomi	6	0	0	6
dit,fanIn,fanOut	6	dit,fanIn,fanOut	6	dit,fanIn,fanOut	6	0	0	6
dit,fanIn,fanOut ,noai	6	dit,fanIn,fanOut ,noai	6	dit,fanIn,fanOut ,noai	6	0	0	6
dit,fanIn,fanOut ,noai,nomi	6	dit,fanIn,fanOut ,noai,nomi	6	dit,fanIn,fanOut ,noai,nomi	6	0	0	6
dit,fanIn,fanOut ,nomi	6	dit,fanIn,fanOut ,nomi	6	dit,fanIn,fanOut ,nomi	6	0	0	6
dit,fanIn,fanOut,noc	5	dit,fanIn,fanOut,noc	5	dit,fanIn,fanOut,noc	5	0	0	5
dit,fanIn,fanOut,noc ,noai	5	dit,fanIn,fanOut,noc ,noai	5	dit,fanIn,fanOut,noc ,noai	5	0	0	5
dit,fanIn,fanOut,noc ,noai,nomi	5	dit,fanIn,fanOut,noc ,noai,nomi	5	dit,fanIn,fanOut,noc ,noai,nomi	5	0	0	5
dit,fanIn,fanOut,noc ,nomi	5	dit,fanIn,fanOut,noc ,nomi	5	dit,fanIn,fanOut,noc ,nomi	5	0	0	5
dit,fanIn,noc	5	dit,fanIn,noc	4	dit,fanIn,noc	4	1	0	4
dit,fanIn,noc ,noai	5	dit,fanIn,noc ,noai	4	dit,fanIn,noc ,noai	4	1	0	4
dit,fanIn,noc ,noai,nomi	5	dit,fanIn,noc ,noai,nomi	5	dit,fanIn,noc ,noai,nomi	5	0	0	5
dit,fanIn,noc ,nomi	5	dit,fanIn,noc ,nomi	5	dit,fanIn,noc ,nomi	5	0	0	5
dit,fanOut	6	dit,fanOut	4	dit,fanOut	4	2	0	4
dit,fanOut ,noai	6	dit,fanOut ,noai	5	dit,fanOut ,noai	5	1	0	5
dit,fanOut ,noai,nomi	6	dit,fanOut ,noai,nomi	6	dit,fanOut ,noai,nomi	6	0	0	6
dit,fanOut ,nomi	6	dit,fanOut ,nomi	6	dit,fanOut ,nomi	6	0	0	6
dit,fanOut,noc	5	dit,fanOut,noc	4	dit,fanOut,noc	4	1	0	4
dit,fanOut,noc ,noai	5	dit,fanOut,noc ,noai	5	dit,fanOut,noc ,noai	5	0	0	5
dit,fanOut,noc ,noai,nomi	5	dit,fanOut,noc ,noai,nomi	5	dit,fanOut,noc ,noai,nomi	5	0	0	5
dit,fanOut,noc ,nomi	5	dit,fanOut,noc ,nomi	5	dit,fanOut,noc ,nomi	5	0	0	5
dit,noc	6					6	0	0
dit,noc ,noai	6	dit,noc ,noai	4	dit,noc ,noai	4	2	0	4
dit,noc ,noai,nomi	6	dit,noc ,noai,nomi	5	dit,noc ,noai,nomi	5	1	0	5
dit,noc ,nomi	6	dit,noc ,nomi	5	dit,noc ,nomi	5	1	0	5
dit,noc,fanIn	1	dit,noc,fanIn	1	dit,noc,fanIn	1	0	0	1
dit,noc,fanIn ,noai	1	dit,noc,fanIn ,noai	1	dit,noc,fanIn ,noai	1	0	0	1
dit,noc,fanIn ,noai,nomi	1	dit,noc,fanIn ,noai,nomi	1	dit,noc,fanIn ,noai,nomi	1	0	0	1
dit,noc,fanIn ,nomi	1	dit,noc,fanIn ,nomi	1	dit,noc,fanIn ,nomi	1	0	0	1
dit,noc,fanIn,fanOut	1	dit,noc,fanIn,fanOut	1	dit,noc,fanIn,fanOut	1	0	0	1
dit,noc,fanIn,fanOut ,noai	1	dit,noc,fanIn,fanOut ,noai	1	dit,noc,fanIn,fanOut ,noai	1	0	0	1
dit,noc,fanIn,fanOut ,noai,nomi	1	dit,noc,fanIn,fanOut ,noai,nomi	1	dit,noc,fanIn,fanOut ,noai,nomi	1	0	0	1
dit,noc,fanIn,fanOut ,nomi	1	dit,noc,fanIn,fanOut ,nomi	1	dit,noc,fanIn,fanOut ,nomi	1	0	0	1
dit,noc,fanOut	1	dit,noc,fanOut	1	dit,noc,fanOut	1	0	0	1
dit,noc,fanOut ,noai	1	dit,noc,fanOut ,noai	1	dit,noc,fanOut ,noai	1	0	0	1
dit,noc,fanOut ,noai,nomi	1	dit,noc,fanOut ,noai,nomi	1	dit,noc,fanOut ,noai,nomi	1	0	0	1
dit,noc,fanOut ,nomi	1	dit,noc,fanOut ,nomi	1	dit,noc,fanOut ,nomi	1	0	0	1
fanIn	6					6	0	0
fanIn ,noai	6	fanIn ,noai	5	fanIn ,noai	5	1	0	5
fanIn ,noai,nomi	6	fanIn ,noai,nomi	6	fanIn ,noai,nomi	6	0	0	6
fanIn ,nomi	6	fanIn ,nomi	6	fanIn ,nomi	6	0	0	6
fanIn,fanOut	6	fanIn,fanOut	6	fanIn,fanOut	6	0	0	6
fanIn,fanOut ,noai	6	fanIn,fanOut ,noai	6	fanIn,fanOut ,noai	6	0	0	6
fanIn,fanOut ,noai,nomi	6	fanIn,fanOut ,noai,nomi	6	fanIn,fanOut ,noai,nomi	6	0	0	6
fanIn,fanOut ,nomi	6	fanIn,fanOut ,nomi	6	fanIn,fanOut ,nomi	6	0	0	6
fanIn,fanOut,noc	5	fanIn,fanOut,noc	5	fanIn,fanOut,noc	5	0	0	5
fanIn,fanOut,noc ,noai	5	fanIn,fanOut,noc ,noai	5	fanIn,fanOut,noc ,noai	5	0	0	5
fanIn,fanOut,noc ,noai,nomi	5	fanIn,fanOut,noc ,noai,nomi	5	fanIn,fanOut,noc ,noai,nomi	5	0	0	5
fanIn,fanOut,noc ,nomi	5	fanIn,fanOut,noc ,nomi	5	fanIn,fanOut,noc ,nomi	5	0	0	5
fanIn,noc	5	fanIn,noc	3	fanIn,noc	3	2	0	3
fanIn,noc ,noai	5	fanIn,noc ,noai	4	fanIn,noc ,noai	4	1	0	4
fanIn,noc ,noai,nomi	5	fanIn,noc ,noai,nomi	5	fanIn,noc ,noai,nomi	5	0	0	5
fanIn,noc ,nomi	5	fanIn,noc ,nomi	5	fanIn,noc ,nomi	5	0	0	5
fanOut	6					6	0	0
fanOut ,noai	6	fanOut ,noai	4	fanOut ,noai	4	2	0	4
fanOut ,noai,nomi	6	fanOut ,noai,nomi	6	fanOut ,noai,nomi	6	0	0	6
fanOut ,nomi	6	fanOut ,nomi	6	fanOut ,nomi	6	0	0	6
fanOut,noc	5	fanOut,noc	3	fanOut,noc	3	2	0	3
fanOut,noc ,noai	5	fanOut,noc ,noai	4	fanOut,noc ,noai	4	1	0	4
fanOut,noc ,noai,nomi	5	fanOut,noc ,noai,nomi	5	fanOut,noc ,noai,nomi	5	0	0	5
fanOut,noc ,nomi	5	fanOut,noc ,nomi	5	fanOut,noc ,nomi	5	0	0	5
noc	6					6	0	0
noc ,noai	6	noc ,noai	3	noc ,noai	3	3	0	3
noc ,noai,nomi	6	noc ,noai,nomi	5	noc ,noai,nomi	5	1	0	5
noc ,nomi	6	noc ,nomi	5	noc ,nomi	5	1	0	5
noc,fanIn	1	noc,fanIn	1	noc,fanIn	1	0	0	1
noc,fanIn ,noai	1	noc,fanIn ,noai	1	noc,fanIn ,noai	1	0	0	1
noc,fanIn ,noai,nomi	1	noc,fanIn ,noai,nomi	1	noc,fanIn ,noai,nomi	1	0	0	1
noc,fanIn ,nomi	1	noc,fanIn ,nomi	1	noc,fanIn ,nomi	1	0	0	1
noc,fanIn,fanOut	1	noc,fanIn,fanOut	1	noc,fanIn,fanOut	1	0	0	1
noc,fanIn,fanOut ,noai	1	noc,fanIn,fanOut ,noai	1	noc,fanIn,fanOut ,noai	1	0	0	1
noc,fanIn,fanOut ,noai,nomi	1	noc,fanIn,fanOut ,noai,nomi	1	noc,fanIn,fanOut ,noai,nomi	1	0	0	1
noc,fanIn,fanOut ,nomi	1	noc,fanIn,fanOut ,nomi	1	noc,fanIn,fanOut ,nomi	1	0	0	1
noc,fanOut	1	noc,fanOut	1	noc,fanOut	1	0	0	1
noc,fanOut ,noai	1	noc,fanOut ,noai	1	noc,fanOut ,noai	1	0	0	1
noc,fanOut ,noai,nomi	1	noc,fanOut ,noai,nomi	1	noc,fanOut ,noai,nomi	1	0	0	1
noc,fanOut ,nomi	1	noc,fanOut ,nomi	1	noc,fanOut ,nomi	1	0	0	1
dit	34					34	0	0
dit,doc	1					1	0	0
dit,doc,fanIn	1					1	0	0
dit,fanIn	2					2	0	0
dit,fanIn,fanOut	1	dit,fanIn,fanOut	1	dit,fanIn,fanOut	1	0	0	1
dit,fanIn,fanOut,noai	1	dit,fanIn,fanOut,noai	1	dit,fanIn,fanOut,noai	1	0	0	1
dit,fanIn,fanOut,noai,nomi	1	dit,fanIn,fanOut,noai,nomi	1	dit,fanIn,fanOut,noai,nomi	1	0	0	1
dit,fanIn,fanOut,noc	1	dit,fanIn,fanOut,noc	1	dit,fanIn,fanOut,noc	1	0	0	1
dit,fanIn,fanOut,noc,noai	1	dit,fanIn,fanOut,noc,noai	1	dit,fanIn,fanOut,noc,noai	1	0	0	1
dit,fanIn,fanOut,noc,noai,nomi	1	dit,fanIn,fanOut,noc,noai,nomi	1	dit,fanIn,fanOut,noc,noai,nomi	1	0	0	1
dit,fanIn,fanOut,noc,nomi	1	dit,fanIn,fanOut,noc,nomi	1	dit,fanIn,fanOut,noc,nomi	1	0	0	1
dit,fanIn,fanOut,nomi	1	dit,fanIn,fanOut,nomi	1	dit,fanIn,fanOut,nomi	1	0	0	1
dit,fanIn,noai	1	dit,fanIn,noai	1	dit,fanIn,noai	1	0	0	1
dit,fanIn,noai,nomi	1	dit,fanIn,noai,nomi	1	dit,fanIn,noai,nomi	1	0	0	1
dit,fanIn,noc	1					1	0	0
dit,fanIn,noc,noai	1	dit,fanIn,noc,noai	1	dit,fanIn,noc,noai	1	0	0	1
dit,fanIn,noc,noai,nomi	1	dit,fanIn,noc,noai,nomi	1	dit,fanIn,noc,noai,nomi	1	0	0	1
dit,fanIn,noc,nomi	1	dit,fanIn,noc,nomi	1	dit,fanIn,noc,nomi	1	0	0	1
dit,fanIn,nomi	1	dit,fanIn,nomi	1	dit,fanIn,nomi	1	0	0	1
dit,fanOut	1					1	0	0
dit,fanOut,noai	1	dit,fanOut,noai	1	dit,fanOut,noai	1	0	0	1
dit,fanOut,noai,nomi	1	dit,fanOut,noai,nomi	1	dit,fanOut,noai,nomi	1	0	0	1
dit,fanOut,noc	1					1	0	0
dit,fanOut,noc,noai	1	dit,fanOut,noc,noai	1	dit,fanOut,noc,noai	1	0	0	1
dit,fanOut,noc,noai,nomi	1	dit,fanOut,noc,noai,nomi	1	dit,fanOut,noc,noai,nomi	1	0	0	1
dit,fanOut,noc,nomi	1	dit,fanOut,noc,nomi	1	dit,fanOut,noc,nomi	1	0	0	1
dit,fanOut,nomi	1	dit,fanOut,nomi	1	dit,fanOut,nomi	1	0	0	1
dit,ic	30					30	0	0
dit,ic,mfa	19	dit,ic,mfa	2	dit,ic,mfa	2	17	0	2
dit,IFANIN	2					2	0	0
dit,IFANIN,noai	2	dit,IFANIN,noai	2	dit,IFANIN,noai	2	0	0	2
dit,IFANIN,noc	2	dit,IFANIN,noc	2	dit,IFANIN,noc	2	0	0	2
dit,IFANIN,noc,noai	2	dit,IFANIN,noc,noai	2	dit,IFANIN,noc,noai	2	0	0	2
dit,IFANIN,noc,nomi	2	dit,IFANIN,noc,nomi	2	dit,IFANIN,noc,nomi	2	0	0	2
dit,IFANIN,noc,nomi,noai	2	dit,IFANIN,noc,nomi,noai	2	dit,IFANIN,noc,nomi,noai	2	0	0	2
dit,IFANIN,nomi	2	dit,IFANIN,nomi	2	dit,IFANIN,nomi	2	0	0	2
dit,IFANIN,nomi,noai	2	dit,IFANIN,nomi,noai	2	dit,IFANIN,nomi,noai	2	0	0	2
dit,mfa	30	dit,mfa	5	dit,mfa	5	25	0	5
dit,mfa,ic	11	dit,mfa,ic	4	dit,mfa,ic	4	7	0	4
dit,noai	3	dit,noai	2	dit,noai	2	1	0	2
dit,noai,nomi	1	dit,noai,nomi	1	dit,noai,nomi	1	0	0	1
dit,noc	34	dit,noc	2	dit,noc	2	32	0	2
dit,noc,doc	1					1	0	0
dit,noc,doc,fanIn	1					1	0	0
dit,noc,fanIn	1					1	0	0
dit,noc,ic	30	dit,noc,ic	1	dit,noc,ic	1	29	0	1
dit,noc,ic,mfa	19	dit,noc,ic,mfa	2	dit,noc,ic,mfa	2	17	0	2
dit,noc,mfa	30	dit,noc,mfa	6	dit,noc,mfa	6	24	0	6
dit,noc,mfa,ic	11	dit,noc,mfa,ic	4	dit,noc,mfa,ic	4	7	0	4
dit,noc,noai	3	dit,noc,noai	3	dit,noc,noai	3	0	0	3
dit,noc,noai,nomi	1	dit,noc,noai,nomi	1	dit,noc,noai,nomi	1	0	0	1
dit,noc,nomi	3	dit,noc,nomi	3	dit,noc,nomi	3	0	0	3
dit,noc,nomi,noai	2	dit,noc,nomi,noai	2	dit,noc,nomi,noai	2	0	0	2
dit,nomi	3	dit,nomi	2	dit,nomi	2	1	0	2
dit,nomi,noai	2	dit,nomi,noai	2	dit,nomi,noai	2	0	0	2
doc	1					1	0	0
doc,fanIn	1					1	0	0
fanIn	2					2	0	0
fanIn,fanOut	1	fanIn,fanOut	1	fanIn,fanOut	1	0	0	1
fanIn,fanOut,noai	1	fanIn,fanOut,noai	1	fanIn,fanOut,noai	1	0	0	1
fanIn,fanOut,noai,nomi	1	fanIn,fanOut,noai,nomi	1	fanIn,fanOut,noai,nomi	1	0	0	1
fanIn,fanOut,noc	1	fanIn,fanOut,noc	1	fanIn,fanOut,noc	1	0	0	1
fanIn,fanOut,noc,noai	1	fanIn,fanOut,noc,noai	1	fanIn,fanOut,noc,noai	1	0	0	1
fanIn,fanOut,noc,noai,nomi	1	fanIn,fanOut,noc,noai,nomi	1	fanIn,fanOut,noc,noai,nomi	1	0	0	1
fanIn,fanOut,noc,nomi	1	fanIn,fanOut,noc,nomi	1	fanIn,fanOut,noc,nomi	1	0	0	1
fanIn,fanOut,nomi	1	fanIn,fanOut,nomi	1	fanIn,fanOut,nomi	1	0	0	1
fanIn,noai	1	fanIn,noai	1	fanIn,noai	1	0	0	1
fanIn,noai,nomi	1	fanIn,noai,nomi	1	fanIn,noai,nomi	1	0	0	1
fanIn,noc	1					1	0	0
fanIn,noc,noai	1	fanIn,noc,noai	1	fanIn,noc,noai	1	0	0	1
fanIn,noc,noai,nomi	1	fanIn,noc,noai,nomi	1	fanIn,noc,noai,nomi	1	0	0	1
fanIn,noc,nomi	1	fanIn,noc,nomi	1	fanIn,noc,nomi	1	0	0	1
fanIn,nomi	1	fanIn,nomi	1	fanIn,nomi	1	0	0	1
fanOut	1					1	0	0
fanOut,noai	1	fanOut,noai	1	fanOut,noai	1	0	0	1
fanOut,noai,nomi	1	fanOut,noai,nomi	1	fanOut,noai,nomi	1	0	0	1
fanOut,noc	1					1	0	0
fanOut,noc,noai	1	fanOut,noc,noai	1	fanOut,noc,noai	1	0	0	1
fanOut,noc,noai,nomi	1	fanOut,noc,noai,nomi	1	fanOut,noc,noai,nomi	1	0	0	1
fanOut,noc,nomi	1	fanOut,noc,nomi	1	fanOut,noc,nomi	1	0	0	1
fanOut,nomi	1	fanOut,nomi	1	fanOut,nomi	1	0	0	1
ic	30					30	0	0
ic,mfa	19	ic,mfa	2	ic,mfa	2	17	0	2
IFANIN	2					2	0	0
IFANIN,noai	2					2	0	0
IFANIN,noc	2					2	0	0
IFANIN,noc,noai	2	IFANIN,noc,noai	2	IFANIN,noc,noai	2	0	0	2
IFANIN,noc,nomi	2	IFANIN,noc,nomi	2	IFANIN,noc,nomi	2	0	0	2
IFANIN,noc,nomi,noai	2	IFANIN,noc,nomi,noai	2	IFANIN,noc,nomi,noai	2	0	0	2
IFANIN,nomi	2	IFANIN,nomi	2	IFANIN,nomi	2	0	0	2
IFANIN,nomi,noai	2	IFANIN,nomi,noai	2	IFANIN,nomi,noai	2	0	0	2
mfa	30	mfa	5	mfa	5	25	0	5
mfa,ic	11	mfa,ic	4	mfa,ic	4	7	0	4
noai	9	noai	2	noai	2	7	0	2
noai,nomi	7	noai,nomi	6	noai,nomi	6	1	0	6
noc	34					34	0	0
noc,doc	1					1	0	0
noc,doc,fanIn	1					1	0	0
noc,fanIn	1					1	0	0
noc,ic	30					30	0	0
noc,ic,mfa	19	noc,ic,mfa	2	noc,ic,mfa	2	17	0	2
noc,mfa	30	noc,mfa	5	noc,mfa	5	25	0	5
noc,mfa,ic	11	noc,mfa,ic	4	noc,mfa,ic	4	7	0	4
noc,noai	3	noc,noai	2	noc,noai	2	1	0	2
noc,noai,nomi	1	noc,noai,nomi	1	noc,noai,nomi	1	0	0	1
noc,nomi	3	noc,nomi	2	noc,nomi	2	1	0	2
noc,nomi,noai	2	noc,nomi,noai	2	noc,nomi,noai	2	0	0	2
nomi	9	nomi	4	nomi	3	5	1	3
nomi,noai	2	nomi,noai	2	nomi,noai	2	0	0	2
	967		445		444	522	1	444

## Sheet: table
Datasets	N	All	SmallDatasets	skewd	Remaining
dit	1	39	39	0	0
doc	1	1	1	0	0
fanIn	1	8	8	0	0
fanOut	1	7	7	0	0
ic	1	30	30	0	0
IFANIN	1	2	2	0	0
mfa	1	30	25	0	5
noai	1	9	7	0	2
noc	1	40	40	0	0
nomi	1	9	5	1	3
dit,doc	2	1	1	0	0
dit,fanIn	2	8	5	0	3
dit,fanOut	2	7	3	0	4
dit,ic	2	30	30	0	0
dit,IFANIN	2	2	2	0	0
dit,mfa	2	30	25	0	5
dit,noai	2	9	4	0	5
dit,noc	2	40	38	0	2
dit,nomi	2	9	3	0	6
doc,fanIn	2	1	1	0	0
fanIn,fanOut	2	7	0	0	7
fanIn,noai	2	7	1	0	6
fanIn,noc	2	6	3	0	3
fanIn,nomi	2	7	0	0	7
fanOut,noai	2	7	2	0	5
fanOut,noc	2	6	3	0	3
fanOut,nomi	2	7	0	0	7
ic,mfa	2	19	17	0	2
IFANIN,noai	2	2	2	0	0
IFANIN,noc	2	2	2	0	0
IFANIN,nomi	2	2	0	0	2
mfa,ic	2	11	7	0	4
noai,nomi	2	7	1	0	6
noc,doc	2	1	1	0	0
noc,fanIn	2	2	1	0	1
noc,fanOut	2	1	0	0	1
noc,ic	2	30	30	0	0
noc,mfa	2	30	25	0	5
noc,noai	2	9	4	0	5
noc,nomi	2	9	2	0	7
nomi,noai	2	2	0	0	2
dit,doc,fanIn	3	1	1	0	0
dit,fanIn,fanOut	3	7	0	0	7
dit,fanIn,noai	3	7	1	0	6
dit,fanIn,noc	3	6	2	0	4
dit,fanIn,nomi	3	7	0	0	7
dit,fanOut,noai	3	7	1	0	6
dit,fanOut,noc	3	6	2	0	4
dit,fanOut,nomi	3	7	0	0	7
dit,ic,mfa	3	19	17	0	2
dit,IFANIN,noai	3	2	0	0	2
dit,IFANIN,noc	3	2	0	0	2
dit,IFANIN,nomi	3	2	0	0	2
dit,mfa,ic	3	11	7	0	4
dit,noai,nomi	3	7	1	0	6
dit,noc,doc	3	1	1	0	0
dit,noc,fanIn	3	2	1	0	1
dit,noc,fanOut	3	1	0	0	1
dit,noc,ic	3	30	29	0	1
dit,noc,mfa	3	30	24	0	6
dit,noc,noai	3	9	2	0	7
dit,noc,nomi	3	9	1	0	8
dit,nomi,noai	3	2	0	0	2
fanIn,fanOut,noai	3	7	0	0	7
fanIn,fanOut,noc	3	6	0	0	6
fanIn,fanOut,nomi	3	7	0	0	7
fanIn,noai,nomi	3	7	0	0	7
fanIn,noc,noai	3	6	1	0	5
fanIn,noc,nomi	3	6	0	0	6
fanOut,noai,nomi	3	7	0	0	7
fanOut,noc,noai	3	6	1	0	5
fanOut,noc,nomi	3	6	0	0	6
IFANIN,noc,noai	3	2	0	0	2
IFANIN,noc,nomi	3	2	0	0	2
IFANIN,nomi,noai	3	2	0	0	2
noc,doc,fanIn	3	1	1	0	0
noc,fanIn,fanOut	3	1	0	0	1
noc,fanIn,noai	3	1	0	0	1
noc,fanIn,nomi	3	1	0	0	1
noc,fanOut,noai	3	1	0	0	1
noc,fanOut,nomi	3	1	0	0	1
noc,ic,mfa	3	19	17	0	2
noc,mfa,ic	3	11	7	0	4
noc,noai,nomi	3	7	1	0	6
noc,nomi,noai	3	2	0	0	2
dit,fanIn,fanOut,noai	4	7	0	0	7
dit,fanIn,fanOut,noc	4	6	0	0	6
dit,fanIn,fanOut,nomi	4	7	0	0	7
dit,fanIn,noai,nomi	4	7	0	0	7
dit,fanIn,noc,noai	4	6	1	0	5
dit,fanIn,noc,nomi	4	6	0	0	6
dit,fanOut,noai,nomi	4	7	0	0	7
dit,fanOut,noc,noai	4	6	0	0	6
dit,fanOut,noc,nomi	4	6	0	0	6
dit,IFANIN,noc,noai	4	2	0	0	2
dit,IFANIN,noc,nomi	4	2	0	0	2
dit,IFANIN,nomi,noai	4	2	0	0	2
dit,noc,doc,fanIn	4	1	1	0	0
dit,noc,fanIn,fanOut	4	1	0	0	1
dit,noc,fanIn,noai	4	1	0	0	1
dit,noc,fanIn,nomi	4	1	0	0	1
dit,noc,fanOut,noai	4	1	0	0	1
dit,noc,fanOut,nomi	4	1	0	0	1
dit,noc,ic,mfa	4	19	17	0	2
dit,noc,mfa,ic	4	11	7	0	4
dit,noc,noai,nomi	4	7	1	0	6
dit,noc,nomi,noai	4	2	0	0	2
fanIn,fanOut,noai,nomi	4	7	0	0	7
fanIn,fanOut,noc,noai	4	6	0	0	6
fanIn,fanOut,noc,nomi	4	6	0	0	6
fanIn,noc,noai,nomi	4	6	0	0	6
fanOut,noc,noai,nomi	4	6	0	0	6
IFANIN,noc,nomi,noai	4	2	0	0	2
noc,fanIn,fanOut,noai	4	1	0	0	1
noc,fanIn,fanOut,nomi	4	1	0	0	1
noc,fanIn,noai,nomi	4	1	0	0	1
noc,fanOut,noai,nomi	4	1	0	0	1
dit,fanIn,fanOut,noai,nomi	5	7	0	0	7
dit,fanIn,fanOut,noc,noai	5	6	0	0	6
dit,fanIn,fanOut,noc,nomi	5	6	0	0	6
dit,fanIn,noc,noai,nomi	5	6	0	0	6
dit,fanOut,noc,noai,nomi	5	6	0	0	6
dit,IFANIN,noc,nomi,noai	5	2	0	0	2
dit,noc,fanIn,fanOut,noai	5	1	0	0	1
dit,noc,fanIn,fanOut,nomi	5	1	0	0	1
dit,noc,fanIn,noai,nomi	5	1	0	0	1
dit,noc,fanOut,noai,nomi	5	1	0	0	1
fanIn,fanOut,noc,noai,nomi	5	6	0	0	6
noc,fanIn,fanOut,noai,nomi	5	1	0	0	1
dit,fanIn,fanOut,noc,noai,nomi	6	6	0	0	6
dit,noc,fanIn,fanOut,noai,nomi	6	1	0	0	1
		967	522	1	444

## Sheet: eliminate 0
Features	# F	Total Datasets	Small Datasets	skewed	Remaining		Features	# F	Total Datasets	Small Datasets	skewed	Current	diff			Features	# F	Total Datasets	Small Datasets	skewed	Remaining			Occurance of "ic"	Occurance of "mfa"	Occurance of "noai"	Occurance of "nomi"	Occurance of "fanOut"	Occurance of "fanIn''	Occurance of "dit"	Occurance of "noc
mfa	1	30	25	0	5		mfa	1	28	25	0	3	2	3	0	mfa	1	28	25	0	3	3	0		28
noai	1	9	7	0	2		noai	1	9	7	0	2	0	2	0	noai	1	9	7	0	2	2	0			2
nomi	1	9	5	1	3		nomi	1	9	5	1	3	0	3	0	nomi	1	9	5	1	3	3	0				3
dit,fanIn	2	8	5	0	3		dit,fanIn	2	9	5	0	4	-1	4	0	dit,fanIn	2	9	5	0	4	4	0						4	4
dit,fanOut	2	7	3	0	4		dit,fanOut	2	7	3	0	4	0	4	0	dit,fanOut	2	7	3	0	4	4	0					4		4
dit,mfa	2	30	25	0	5		dit,mfa	2	28	25	0	3	2	3	0	dit,mfa	2	28	25	0	3	3	0		3					3
dit,noai	2	9	4	0	5		dit,noai	2	9	4	0	5	0	5	0	dit,noai	2	9	4	0	5	5	0			5				5
dit,noc	2	40	38	0	2		dit,noc	2	40	38	0	2	0	2	0	dit,noc	2	40	38	0	2	2	0							2	2
dit,nomi	2	9	3	0	6		dit,nomi	2	9	3	0	6	0	6	0	dit,nomi	2	9	3	0	6	6	0				6			6
fanIn,fanOut	2	7	0	0	7		fanIn,fanOut	2	6	0	0	6	1	6	0	fanIn,fanOut	2	6	0	0	6	6	0					6	6
fanIn,noai	2	7	1	0	6		fanIn,noai	2	7	1	0	6	0	6	0	fanIn,noai	2	7	1	0	6	6	0			6			6
fanIn,noc	2	8	4	0	4		fanIn,noc	2	8	4	0	4	0	4	0	fanIn,noc	2	8	4	0	4	4	0						4		4
fanIn,nomi	2	7	0	0	7		fanIn,nomi	2	6	0	0	6	1	6	0	fanIn,nomi	2	6	0	0	6	6	0				6		6
fanOut,noai	2	7	2	0	5		fanOut,noai	2	7	2	0	5	0	5	0	fanOut,noai	2	7	2	0	5	5	0			5		5
fanOut,noc	2	7	3	0	4		fanOut,noc	2	7	3	0	4	0	4	0	fanOut,noc	2	7	3	0	4	4	0					4			4
fanOut,nomi	2	7	0	0	7		fanOut,nomi	2	6	0	0	6	1	6	0	fanOut,nomi	2	6	0	0	6	6	0				6	6
ic,mfa	2	30	24	0	6		ic,mfa	2	27	24	0	3	3	3	0	ic,mfa	2	27	24	0	3	3	0	3	3
IFANIN,nomi	2	2	0	0	2				0	0	0		2	0	0	noai,nomi	2	9	1	0	8	8	0			8	8
noai,nomi	2	9	1	0	8		noai,nomi	2	9	1	0	8	0	8	0	noc,mfa	2	28	25	0	3	3	0		3						3
noc,mfa	2	30	25	0	5		noc,mfa	2	28	25	0	3	2	3	0	noc,noai	2	9	4	0	5	5	0			5					5
noc,noai	2	9	4	0	5		noc,noai	2	9	4	0	5	0	5	0	noc,nomi	2	9	2	0	7	7	0				7				7
noc,nomi	2	9	2	0	7		noc,nomi	2	9	2	0	7	0	7	0	dit,fanIn,fanOut	3	6	0	0	6	6	0					6	6	6
dit,fanIn,fanOut	3	7	0	0	7		dit,fanIn,fanOut	3	6	0	0	6	1	6	0	dit,fanIn,noai	3	7	1	0	6	6	0			6			6	6
dit,fanIn,noai	3	7	1	0	6		dit,fanIn,noai	3	7	1	0	6	0	6	0	dit,fanIn,noc	3	8	3	0	5	5	0						5	5	5
dit,fanIn,noc	3	8	3	0	5		dit,fanIn,noc	3	8	3	0	5	0	5	0	dit,fanIn,nomi	3	6	0	0	6	6	0				6		6	6
dit,fanIn,nomi	3	7	0	0	7		dit,fanIn,nomi	3	6	0	0	6	1	6	0	dit,fanOut,noai	3	7	1	0	6	6	0			6		6		6
dit,fanOut,noai	3	7	1	0	6		dit,fanOut,noai	3	7	1	0	6	0	6	0	dit,fanOut,noc	3	7	2	0	5	5	0					5		5	5
dit,fanOut,noc	3	7	2	0	5		dit,fanOut,noc	3	7	2	0	5	0	5	0	dit,fanOut,nomi	3	6	0	0	6	6	0				6	6		6
dit,fanOut,nomi	3	7	0	0	7		dit,fanOut,nomi	3	6	0	0	6	1	6	0	dit,ic,mfa	3	28	24	0	4	4	0	4	4					4
dit,ic,mfa	3	30	24	0	6		dit,ic,mfa	3	28	24	0	4	2	4	0	dit,noai,nomi	3	9	1	0	8	8	0			8	8			8
dit,IFANIN,noai	3	2	0	0	2				0	0	0		2	0	0	dit,mfa,noc	3	27	24	0	3	3	0		3					3	3
dit,IFANIN,noc	3	2	0	0	2				0	0	0		2	0	0	dit,noc,noai	3	9	2	0	7	7	0			7				7	7
dit,IFANIN,nomi	3	2	0	0	2				0	0	0		2	0	0	dit,noc,nomi	3	9	1	0	8	8	0				8			8	8
dit,noai,nomi	3	7	1	0	6		dit,noai,nomi	3	9	1	0	8	-2	8	0	fanIn,fanOut,noai	3	6	0	0	6	6	0			6		6	6
dit,noc,ic	3	30	29	0	1				29	29	0		1	0	0	fanIn,fanOut,noc	3	6	0	0	6	6	0					6	6		6
dit,noc,mfa	3	30	24	0	6		dit,mfa,noc	3	27	24	0	3	3	3	0	fanIn,fanOut,nomi	3	6	0	0	6	6	0				6	6	6
dit,noc,noai	3	9	2	0	7		dit,noc,noai	3	9	2	0	7	0	7	0	fanIn,noai,nomi	3	6	0	0	6	6	0			6	6		6
dit,noc,nomi	3	9	1	0	8		dit,noc,nomi	3	9	1	0	8	0	8	0	fanIn,noc,noai	3	7	1	0	6	6	0			6			6		6
dit,nomi,noai	3	2	0	0	2				0	0	0		2	0	0	fanIn,noc,nomi	3	6	0	0	6	6	0				6		6		6
fanIn,fanOut,noai	3	7	0	0	7		fanIn,fanOut,noai	3	6	0	0	6	1	6	0	fanOut,noai,nomi	3	6	0	0	6	6	0			6	6	6
fanIn,fanOut,noc	3	7	0	0	7		fanIn,fanOut,noc	3	6	0	0	6	1	6	0	fanOut,noc,noai	3	7	1	0	6	6	0			6		6			6
fanIn,fanOut,nomi	3	7	0	0	7		fanIn,fanOut,nomi	3	6	0	0	6	1	6	0	fanOut,noc,nomi	3	6	0	0	6	6	0				6	6			6
fanIn,noai,nomi	3	7	0	0	7		fanIn,noai,nomi	3	6	0	0	6	1	6	0	ic,mfa,noc	3	27	24	0	3	3	0	3	3						3
fanIn,noc,noai	3	7	1	0	6		fanIn,noc,noai	3	7	1	0	6	0	6	0	noc,noai,nomi	3	9	1	0	8	8	0			8	8				8
fanIn,noc,nomi	3	7	0	0	7		fanIn,noc,nomi	3	6	0	0	6	1	6	0	dit,fanIn,fanOut,noai	4	6	0	0	6	6	0			6		6	6	6
fanOut,noai,nomi	3	7	0	0	7		fanOut,noai,nomi	3	6	0	0	6	1	6	0	dit,fanIn,fanOut,noc	4	6	0	0	6	6	0					6	6	6	6
fanOut,noc,noai	3	7	1	0	6		fanOut,noc,noai	3	7	1	0	6	0	6	0	dit,fanIn,fanOut,nomi	4	6	0	0	6	6	0				6	6	6	6
fanOut,noc,nomi	3	7	0	0	7		fanOut,noc,nomi	3	6	0	0	6	1	6	0	dit,fanIn,noai,nomi	4	6	0	0	6	6	0			6	6		6	6
IFANIN,noc,noai	3	2	0	0	2				0	0	0		2	0	0	dit,fanIn,noc,noai	4	7	1	0	6	6	0			6			6	6	6
IFANIN,noc,nomi	3	2	0	0	2				0	0	0		2	0	0	dit,fanIn,noc,nomi	4	6	0	0	6	6	0				6		6	6	6
IFANIN,nomi,noai	3	2	0	0	2				0	0	0		2	0	0	dit,fanOut,noai,nomi	4	6	0	0	6	6	0			6	6	6		6
noc,ic,mfa	3	30	24	0	6		ic,mfa,noc	3	27	24	0	3	3	3	0	dit,fanOut,noc,noai	4	6	0	0	6	6	0			6		6		6	6
noc,noai,nomi	3	9	1	0	8		noc,noai,nomi	3	9	1	0	8	0	8	0	dit,fanOut,noc,nomi	4	6	0	0	6	6	0				6	6		6	6
dit,fanIn,fanOut,noai	4	7	0	0	7		dit,fanIn,fanOut,noai	4	6	0	0	6	1	6	0	dit,ic,noc,mfa	4	27	24	0	3	3	0	3	3					3	3
dit,fanIn,fanOut,noc	4	7	0	0	7		dit,fanIn,fanOut,noc	4	6	0	0	6	1	6	0	dit,noc,noai,nomi	4	7	1	0	6	6	0			6	6			6	6
dit,fanIn,fanOut,nomi	4	7	0	0	7		dit,fanIn,fanOut,nomi	4	6	0	0	6	1	6	0	fanIn,fanOut,noai,nomi	4	6	0	0	6	6	0			6	6	6	6
dit,fanIn,noai,nomi	4	7	0	0	7		dit,fanIn,noai,nomi	4	6	0	0	6	1	6	0	fanIn,fanOut,noc,noai	4	6	0	0	6	6	0			6		6	6		6
dit,fanIn,noc,noai	4	7	1	0	6		dit,fanIn,noc,noai	4	7	1	0	6	0	6	0	fanIn,fanOut,noc,nomi	4	6	0	0	6	6	0				6	6	6		6
dit,fanIn,noc,nomi	4	7	0	0	7		dit,fanIn,noc,nomi	4	6	0	0	6	1	6	0	fanIn,noc,noai,nomi	4	6	0	0	6	6	0			6	6		6		6
dit,fanOut,noai,nomi	4	7	0	0	7		dit,fanOut,noai,nomi	4	6	0	0	6	1	6	0	fanOut,noc,noai,nomi	4	6	0	0	6	6	0			6	6	6			6
dit,fanOut,noc,noai	4	7	0	0	7		dit,fanOut,noc,noai	4	6	0	0	6	1	6	0	dit,fanIn,fanOut,noai,nomi	5	6	0	0	6	6	0			6	6	6	6	6
dit,fanOut,noc,nomi	4	7	0	0	7		dit,fanOut,noc,nomi	4	6	0	0	6	1	6	0	dit,fanIn,fanOut,noc,noai	5	6	0	0	6	6	0			6		6	6	6	6
dit,IFANIN,noc,noai	4	2	0	0	2				0	0	0		2	0	0	dit,fanIn,fanOut,noc,nomi	5	6	0	0	6	6	0				6	6	6	6	6
dit,IFANIN,noc,nomi	4	2	0	0	2				0	0	0		2	0	0	dit,fanIn,noc,noai,nomi	5	6	0	0	6	6	0			6	6		6	6	6
dit,IFANIN,nomi,noai	4	2	0	0	2				0	0	0		2	0	0	dit,fanOut,noc,noai,nomi	5	6	0	0	6	6	0			6	6	6		6	6
dit,noc,ic,mfa	4	30	24	0	6		dit,ic,noc,mfa	4	27	24	0	3	3	3	0	fanIn,fanOut,noc,noai,nomi	5	6	0	0	6	6	0			6	6	6	6		6
dit,noc,noai,nomi	4	9	1	0	8		dit,noc,noai,nomi	4	7	1	0	6	2	6	0	dit,fanIn,fanOut,noc,noai,nomi	6	6	0	0	6	6	0			6	6	6	6	6	6
fanIn,fanOut,noai,nomi	4	7	0	0	7		fanIn,fanOut,noai,nomi	4	6	0	0	6	1	6	0	Total		659	293	1	365			13	50	192	198	180	181	193	193
fanIn,fanOut,noc,noai	4	7	0	0	7		fanIn,fanOut,noc,noai	4	6	0	0	6	1	6	0									4	8	32	32	31	31	35	35
fanIn,fanOut,noc,nomi	4	7	0	0	7		fanIn,fanOut,noc,nomi	4	6	0	0	6	1	6	0
fanIn,noc,noai,nomi	4	7	0	0	7		fanIn,noc,noai,nomi	4	6	0	0	6	1	6	0
fanOut,noc,noai,nomi	4	7	0	0	7		fanOut,noc,noai,nomi	4	6	0	0	6	1	6	0
IFANIN,noc,nomi,noai	4	2	0	0	2				0	0	0		2	0	0
dit,fanIn,fanOut,noai,nomi	5	7	0	0	7		dit,fanIn,fanOut,noai,nomi	5	6	0	0	6	1	6	0
dit,fanIn,fanOut,noc,noai	5	7	0	0	7		dit,fanIn,fanOut,noc,noai	5	6	0	0	6	1	6	0
dit,fanIn,fanOut,noc,nomi	5	7	0	0	7		dit,fanIn,fanOut,noc,nomi	5	6	0	0	6	1	6	0
dit,fanIn,noc,noai,nomi	5	7	0	0	7		dit,fanIn,noc,noai,nomi	5	6	0	0	6	1	6	0
dit,fanOut,noc,noai,nomi	5	7	0	0	7		dit,fanOut,noc,noai,nomi	5	6	0	0	6	1	6	0
dit,IFANIN,noc,nomi,noai	5	2	0	0	2				0	0	0		2	0	0
fanIn,fanOut,noc,noai,nomi	5	7	0	0	7		fanIn,fanOut,noc,noai,nomi	5	6	0	0	6	1	6	0
dit,fanIn,fanOut,noc,noai,nomi	6	7	0	0	7		dit,fanIn,fanOut,noc,noai,nomi	6	6	0	0	6	1	6	0
		767	322	1	444				688	322	1	365

## Sheet: SVM
dataset	featuresset	n	AUC	Errors	TPs	FNs	TNs	FPs	Kernels
ant-1.7.csv['dit', 'ic', 'mfa', 'bug'].csv	['dit', 'ic', 'mfa', 'bug']	4	0.7	0.012587	19	1	50	0	poly
ant-1.7.csv['dit', 'mfa', 'bug'].csv	['dit', 'mfa', 'bug']	3	0	0.00428327	17	0	40	0	linear
ant-1.7.csv['dit', 'noc', 'ic', 'mfa', 'bug'].csv	['dit', 'noc', 'ic', 'mfa', 'bug']	5	0	0.00353392	21	0	55	0	rbf
ant-1.7.csv['dit', 'noc', 'mfa', 'bug'].csv	['dit', 'noc', 'mfa', 'bug']	4	0	0.00367126	19	0	47	0	linear
ant-1.7.csv['ic', 'mfa', 'bug'].csv	['ic', 'mfa', 'bug']	3	0	0.00388979	19	0	47	0	rbf
ant-1.7.csv['mfa', 'bug'].csv	['mfa', 'bug']	2	0.466667	0.0132565	15	0	34	0	poly
ant-1.7.csv['noc', 'ic', 'mfa', 'bug'].csv	['noc', 'ic', 'mfa', 'bug']	4	0	0.00397564	20	0	53	0	sigmoid
ant-1.7.csv['noc', 'mfa', 'bug'].csv	['noc', 'mfa', 'bug']	3	0	0.00433136	18	0	41	0	linear
camel-1.2.csv['dit', 'mfa', 'bug'].csv	['dit', 'mfa', 'bug']	3	0.153846	0.00962118	13	0	22	0	sigmoid
camel-1.2.csv['dit', 'mfa', 'ic', 'bug'].csv	['dit', 'mfa', 'ic', 'bug']	4	0	0.00630327	14	0	24	0	rbf
camel-1.2.csv['dit', 'noc', 'mfa', 'bug'].csv	['dit', 'noc', 'mfa', 'bug']	4	0	0.00722613	14	0	27	0	sigmoid
camel-1.2.csv['dit', 'noc', 'mfa', 'ic', 'bug'].csv	['dit', 'noc', 'mfa', 'ic', 'bug']	5	0	0.00581312	16	0	28	0	linear
camel-1.2.csv['mfa', 'bug'].csv	['mfa', 'bug']	2	0	0.00876104	12	0	17	0	rbf
camel-1.2.csv['mfa', 'ic', 'bug'].csv	['mfa', 'ic', 'bug']	3	0	0.00720179	14	0	21	0	rbf
camel-1.2.csv['noc', 'mfa', 'bug'].csv	['noc', 'mfa', 'bug']	3	0	0.00707806	13	0	22	0	linear
camel-1.2.csv['noc', 'mfa', 'ic', 'bug'].csv	['noc', 'mfa', 'ic', 'bug']	4	0.00533333	0.00634834	15	0	25	0	rbf
churn.csv['dit', 'fanIn', 'fanOut', 'bug'].csv	['dit', 'fanIn', 'fanOut', 'bug']	4	0.0751634	0.00764955	17	0	18	0	sigmoid
churn.csv['dit', 'fanIn', 'fanOut', 'noai', 'bug'].csv	['dit', 'fanIn', 'fanOut', 'noai', 'bug']	5	0.00405844	0.00356159	28	0	44	0	sigmoid
churn.csv['dit', 'fanIn', 'fanOut', 'noai', 'nomi', 'bug'].csv	['dit', 'fanIn', 'fanOut', 'noai', 'nomi', 'bug']	6	0	0.00255933	32	0	68	0	sigmoid
churn.csv['dit', 'fanIn', 'fanOut', 'noc', 'bug'].csv	['dit', 'fanIn', 'fanOut', 'noc', 'bug']	5	0.0042735	0.00575723	18	0	26	0	rbf
churn.csv['dit', 'fanIn', 'fanOut', 'noc', 'noai', 'bug'].csv	['dit', 'fanIn', 'fanOut', 'noc', 'noai', 'bug']	6	0	0.00320429	28	0	49	0	linear
churn.csv['dit', 'fanIn', 'fanOut', 'noc', 'noai', 'nomi', 'bug'].csv	['dit', 'fanIn', 'fanOut', 'noc', 'noai', 'nomi', 'bug']	7	0	0.0024409	32	0	71	0	sigmoid
churn.csv['dit', 'fanIn', 'fanOut', 'noc', 'nomi', 'bug'].csv	['dit', 'fanIn', 'fanOut', 'noc', 'nomi', 'bug']	6	0	0.0031574	27	0	53	0	sigmoid
churn.csv['dit', 'fanIn', 'fanOut', 'nomi', 'bug'].csv	['dit', 'fanIn', 'fanOut', 'nomi', 'bug']	5	0	0.00332883	26	0	49	0	sigmoid
churn.csv['dit', 'fanIn', 'noai', 'bug'].csv	['dit', 'fanIn', 'noai', 'bug']	4	0.00210084	0.00590564	17	0	28	0	sigmoid
churn.csv['dit', 'fanIn', 'noai', 'nomi', 'bug'].csv	['dit', 'fanIn', 'noai', 'nomi', 'bug']	5	0	0.0034349	23	0	48	0	linear
churn.csv['dit', 'fanIn', 'noc', 'noai', 'bug'].csv	['dit', 'fanIn', 'noc', 'noai', 'bug']	5	0	0.00485885	19	0	32	0	sigmoid
churn.csv['dit', 'fanIn', 'noc', 'noai', 'nomi', 'bug'].csv	['dit', 'fanIn', 'noc', 'noai', 'nomi', 'bug']	6	0	0.00330285	25	0	52	0	sigmoid
churn.csv['dit', 'fanIn', 'noc', 'nomi', 'bug'].csv	['dit', 'fanIn', 'noc', 'nomi', 'bug']	5	0	0.00501199	16	0	34	0	sigmoid
churn.csv['dit', 'fanIn', 'nomi', 'bug'].csv	['dit', 'fanIn', 'nomi', 'bug']	4	0	0.00630993	15	0	27	0	rbf
churn.csv['dit', 'fanOut', 'noai', 'bug'].csv	['dit', 'fanOut', 'noai', 'bug']	4	0.240741	0.00536441	22	0	27	0	sigmoid
churn.csv['dit', 'fanOut', 'noai', 'nomi', 'bug'].csv	['dit', 'fanOut', 'noai', 'nomi', 'bug']	5	0	0.00326032	27	0	48	0	sigmoid
churn.csv['dit', 'fanOut', 'noc', 'noai', 'bug'].csv	['dit', 'fanOut', 'noc', 'noai', 'bug']	5	0.00390625	0.00461617	24	0	32	0	sigmoid
churn.csv['dit', 'fanOut', 'noc', 'noai', 'nomi', 'bug'].csv	['dit', 'fanOut', 'noc', 'noai', 'nomi', 'bug']	6	0	0.00297021	28	0	55	0	sigmoid
churn.csv['dit', 'fanOut', 'noc', 'nomi', 'bug'].csv	['dit', 'fanOut', 'noc', 'nomi', 'bug']	5	0	0.00487442	21	0	34	0	sigmoid
churn.csv['dit', 'fanOut', 'nomi', 'bug'].csv	['dit', 'fanOut', 'nomi', 'bug']	4	0	0.0053008	19	0	28	0	sigmoid
churn.csv['dit', 'noai', 'bug'].csv	['dit', 'noai', 'bug']	3	0	0.0115947	8	0	12	0	rbf
churn.csv['dit', 'noai', 'nomi', 'bug'].csv	['dit', 'noai', 'nomi', 'bug']	4	0	0.00585193	15	0	27	0	sigmoid
churn.csv['dit', 'noc', 'noai', 'bug'].csv	['dit', 'noc', 'noai', 'bug']	4	0.0121212	0.00994045	11	0	15	0	rbf
churn.csv['dit', 'noc', 'noai', 'nomi', 'bug'].csv	['dit', 'noc', 'noai', 'nomi', 'bug']	5	0	0.00487056	17	0	32	0	sigmoid
churn.csv['dit', 'noc', 'nomi', 'bug'].csv	['dit', 'noc', 'nomi', 'bug']	4	0	0.010381	6	0	15	0	linear
churn.csv['fanIn', 'fanOut', 'bug'].csv	['fanIn', 'fanOut', 'bug']	3	1	0.00900952	14	0	13	0	linear
churn.csv['fanIn', 'fanOut', 'noai', 'bug'].csv	['fanIn', 'fanOut', 'noai', 'bug']	4	0.00258398	0.00338572	27	0	43	0	sigmoid
churn.csv['fanIn', 'fanOut', 'noai', 'nomi', 'bug'].csv	['fanIn', 'fanOut', 'noai', 'nomi', 'bug']	5	0	0.00252974	32	0	67	0	sigmoid
churn.csv['fanIn', 'fanOut', 'noc', 'bug'].csv	['fanIn', 'fanOut', 'noc', 'bug']	4	0	0.00727292	16	0	19	0	sigmoid
churn.csv['fanIn', 'fanOut', 'noc', 'noai', 'bug'].csv	['fanIn', 'fanOut', 'noc', 'noai', 'bug']	5	0	0.00331348	28	0	47	0	sigmoid
churn.csv['fanIn', 'fanOut', 'noc', 'noai', 'nomi', 'bug'].csv	['fanIn', 'fanOut', 'noc', 'noai', 'nomi', 'bug']	6	0	0.00253402	32	0	71	0	rbf
churn.csv['fanIn', 'fanOut', 'noc', 'nomi', 'bug'].csv	['fanIn', 'fanOut', 'noc', 'nomi', 'bug']	5	0	0.00345009	26	0	46	0	sigmoid
churn.csv['fanIn', 'fanOut', 'nomi', 'bug'].csv	['fanIn', 'fanOut', 'nomi', 'bug']	4	0	0.00371704	25	0	41	0	sigmoid
churn.csv['fanIn', 'noai', 'bug'].csv	['fanIn', 'noai', 'bug']	3	0	0.00579332	16	0	26	0	sigmoid
churn.csv['fanIn', 'noai', 'nomi', 'bug'].csv	['fanIn', 'noai', 'nomi', 'bug']	4	0	0.00340166	23	0	47	0	sigmoid
churn.csv['fanIn', 'noc', 'noai', 'bug'].csv	['fanIn', 'noc', 'noai', 'bug']	4	0	0.0052151	19	0	30	0	sigmoid
churn.csv['fanIn', 'noc', 'noai', 'nomi', 'bug'].csv	['fanIn', 'noc', 'noai', 'nomi', 'bug']	5	0	0.0031612	24	0	52	0	sigmoid
churn.csv['fanIn', 'noc', 'nomi', 'bug'].csv	['fanIn', 'noc', 'nomi', 'bug']	4	0	0.0059014	14	0	27	0	sigmoid
churn.csv['fanIn', 'nomi', 'bug'].csv	['fanIn', 'nomi', 'bug']	3	0	0.00742509	12	0	20	0	linear
churn.csv['fanOut', 'noai', 'bug'].csv	['fanOut', 'noai', 'bug']	3	0.0152381	0.00558575	21	0	25	0	rbf
churn.csv['fanOut', 'noai', 'nomi', 'bug'].csv	['fanOut', 'noai', 'nomi', 'bug']	4	0	0.00331165	27	0	48	0	sigmoid
churn.csv['fanOut', 'noc', 'noai', 'bug'].csv	['fanOut', 'noc', 'noai', 'bug']	4	0	0.0046457	23	0	31	0	sigmoid
churn.csv['fanOut', 'noc', 'noai', 'nomi', 'bug'].csv	['fanOut', 'noc', 'noai', 'nomi', 'bug']	5	0	0.00298252	28	0	54	0	sigmoid
churn.csv['fanOut', 'noc', 'nomi', 'bug'].csv	['fanOut', 'noc', 'nomi', 'bug']	4	0	0.00548922	18	0	27	0	sigmoid
churn.csv['fanOut', 'nomi', 'bug'].csv	['fanOut', 'nomi', 'bug']	3	0	0.00705683	16	0	20	0	sigmoid
churn.csv['noai', 'nomi', 'bug'].csv	['noai', 'nomi', 'bug']	3	0	0.00655205	15	0	25	0	sigmoid
churn.csv['noc', 'noai', 'bug'].csv	['noc', 'noai', 'bug']	3	0.0357143	0.0106586	10	0	14	0	rbf
churn.csv['noc', 'noai', 'nomi', 'bug'].csv	['noc', 'noai', 'nomi', 'bug']	4	0	0.00533842	17	0	30	0	rbf
Eclipse JDT Core.csv[' dit ', ' fanIn ', ' fanOut ', ' noc ', 'bug'].csv	[' dit ', ' fanIn ', ' fanOut ', ' noc ', 'bug']	5	0	0.00210728	33	0	87	0	linear
Eclipse JDT Core.csv[' dit ', ' fanIn ', ' fanOut ', ' noc ', 'noai', 'bug'].csv	[' dit ', ' fanIn ', ' fanOut ', ' noc ', 'noai', 'bug']	6	0	0.00159204	38	0	122	0	sigmoid
Eclipse JDT Core.csv[' dit ', ' fanIn ', ' fanOut ', ' noc ', 'noai', 'nomi', 'bug'].csv	[' dit ', ' fanIn ', ' fanOut ', ' noc ', 'noai', 'nomi', 'bug']	7	0	0.00149514	39	0	130	0	linear
Eclipse JDT Core.csv[' dit ', ' fanIn ', ' fanOut ', ' noc ', 'nomi', 'bug'].csv	[' dit ', ' fanIn ', ' fanOut ', ' noc ', 'nomi', 'bug']	6	0	0.00153607	38	0	128	0	sigmoid
Eclipse JDT Core.csv[' dit ', ' fanIn ', ' fanOut ', 'bug'].csv	[' dit ', ' fanIn ', ' fanOut ', 'bug']	4	0.0117117	0.00240676	30	0	74	0	rbf
Eclipse JDT Core.csv[' dit ', ' fanIn ', ' fanOut ', 'noai', 'bug'].csv	[' dit ', ' fanIn ', ' fanOut ', 'noai', 'bug']	5	0	0.00160792	38	0	116	0	linear
Eclipse JDT Core.csv[' dit ', ' fanIn ', ' fanOut ', 'noai', 'nomi', 'bug'].csv	[' dit ', ' fanIn ', ' fanOut ', 'noai', 'nomi', 'bug']	6	0	0.00147238	38	0	126	0	sigmoid
Eclipse JDT Core.csv[' dit ', ' fanIn ', ' fanOut ', 'nomi', 'bug'].csv	[' dit ', ' fanIn ', ' fanOut ', 'nomi', 'bug']	5	0	0.00152808	37	0	123	0	sigmoid
Eclipse JDT Core.csv[' dit ', ' fanIn ', ' noc ', 'bug'].csv	[' dit ', ' fanIn ', ' noc ', 'bug']	4	0	0.00468322	17	0	36	0	linear
Eclipse JDT Core.csv[' dit ', ' fanIn ', ' noc ', 'noai', 'bug'].csv	[' dit ', ' fanIn ', ' noc ', 'noai', 'bug']	5	0	0.00218169	29	0	83	0	linear
Eclipse JDT Core.csv[' dit ', ' fanIn ', ' noc ', 'noai', 'nomi', 'bug'].csv	[' dit ', ' fanIn ', ' noc ', 'noai', 'nomi', 'bug']	6	0	0.00181797	32	0	103	0	linear
Eclipse JDT Core.csv[' dit ', ' fanIn ', ' noc ', 'nomi', 'bug'].csv	[' dit ', ' fanIn ', ' noc ', 'nomi', 'bug']	5	0	0.00202118	29	0	93	0	linear
Eclipse JDT Core.csv[' dit ', ' fanIn ', 'bug'].csv	[' dit ', ' fanIn ', 'bug']	3	0	0.0087158	11	0	18	0	linear
Eclipse JDT Core.csv[' dit ', ' fanIn ', 'noai', 'bug'].csv	[' dit ', ' fanIn ', 'noai', 'bug']	4	0	0.00276794	27	0	71	0	rbf
Eclipse JDT Core.csv[' dit ', ' fanIn ', 'noai', 'nomi', 'bug'].csv	[' dit ', ' fanIn ', 'noai', 'nomi', 'bug']	5	0	0.00199408	30	0	94	0	linear
Eclipse JDT Core.csv[' dit ', ' fanIn ', 'nomi', 'bug'].csv	[' dit ', ' fanIn ', 'nomi', 'bug']	4	0	0.00234283	26	0	81	0	linear
Eclipse JDT Core.csv[' dit ', ' fanOut ', ' noc ', 'bug'].csv	[' dit ', ' fanOut ', ' noc ', 'bug']	4	0	0.00357744	23	0	45	0	linear
Eclipse JDT Core.csv[' dit ', ' fanOut ', ' noc ', 'noai', 'bug'].csv	[' dit ', ' fanOut ', ' noc ', 'noai', 'bug']	5	0	0.00193526	35	0	94	0	linear
Eclipse JDT Core.csv[' dit ', ' fanOut ', ' noc ', 'noai', 'nomi', 'bug'].csv	[' dit ', ' fanOut ', ' noc ', 'noai', 'nomi', 'bug']	6	0	0.00171317	36	0	110	0	sigmoid
Eclipse JDT Core.csv[' dit ', ' fanOut ', ' noc ', 'nomi', 'bug'].csv	[' dit ', ' fanOut ', ' noc ', 'nomi', 'bug']	5	0	0.00179366	35	0	105	0	linear
Eclipse JDT Core.csv[' dit ', ' fanOut ', 'bug'].csv	[' dit ', ' fanOut ', 'bug']	3	0.236364	0.00660297	15	0	22	0	sigmoid
Eclipse JDT Core.csv[' dit ', ' fanOut ', 'noai', 'bug'].csv	[' dit ', ' fanOut ', 'noai', 'bug']	4	0	0.00217649	32	0	81	0	rbf
Eclipse JDT Core.csv[' dit ', ' fanOut ', 'noai', 'nomi', 'bug'].csv	[' dit ', ' fanOut ', 'noai', 'nomi', 'bug']	5	0	0.00195315	34	0	100	0	rbf
Eclipse JDT Core.csv[' dit ', ' fanOut ', 'nomi', 'bug'].csv	[' dit ', ' fanOut ', 'nomi', 'bug']	4	0	0.00202528	31	0	93	0	linear
Eclipse JDT Core.csv[' dit ', ' noc ', 'noai', 'bug'].csv	[' dit ', ' noc ', 'noai', 'bug']	4	0	0.00377743	20	0	50	0	sigmoid
Eclipse JDT Core.csv[' dit ', ' noc ', 'noai', 'nomi', 'bug'].csv	[' dit ', ' noc ', 'noai', 'nomi', 'bug']	5	0	0.00251435	25	0	73	0	linear
Eclipse JDT Core.csv[' dit ', ' noc ', 'nomi', 'bug'].csv	[' dit ', ' noc ', 'nomi', 'bug']	4	0	0.00337193	17	0	57	0	rbf
Eclipse JDT Core.csv[' dit ', 'noai', 'bug'].csv	[' dit ', 'noai', 'bug']	3	0	0.00508698	15	0	31	0	rbf
Eclipse JDT Core.csv[' dit ', 'noai', 'nomi', 'bug'].csv	[' dit ', 'noai', 'nomi', 'bug']	4	0	0.00327131	20	0	56	0	linear
Eclipse JDT Core.csv[' dit ', 'nomi', 'bug'].csv	[' dit ', 'nomi', 'bug']	3	0	0.00503678	11	0	37	0	linear
Eclipse JDT Core.csv[' fanIn ', ' fanOut ', ' noc ', 'bug'].csv	[' fanIn ', ' fanOut ', ' noc ', 'bug']	4	0	0.00299279	28	0	54	0	sigmoid
Eclipse JDT Core.csv[' fanIn ', ' fanOut ', ' noc ', 'noai', 'bug'].csv	[' fanIn ', ' fanOut ', ' noc ', 'noai', 'bug']	5	0	0.00170658	38	0	112	0	sigmoid
Eclipse JDT Core.csv[' fanIn ', ' fanOut ', ' noc ', 'noai', 'nomi', 'bug'].csv	[' fanIn ', ' fanOut ', ' noc ', 'noai', 'nomi', 'bug']	6	0	0.00145662	38	0	130	0	linear
Eclipse JDT Core.csv[' fanIn ', ' fanOut ', ' noc ', 'nomi', 'bug'].csv	[' fanIn ', ' fanOut ', ' noc ', 'nomi', 'bug']	5	0	0.00152125	38	0	125	0	linear
Eclipse JDT Core.csv[' fanIn ', ' fanOut ', 'bug'].csv	[' fanIn ', ' fanOut ', 'bug']	3	0.0421995	0.00437949	23	0	34	0	sigmoid
Eclipse JDT Core.csv[' fanIn ', ' fanOut ', 'noai', 'bug'].csv	[' fanIn ', ' fanOut ', 'noai', 'bug']	4	0	0.00177765	37	0	105	0	sigmoid
Eclipse JDT Core.csv[' fanIn ', ' fanOut ', 'noai', 'nomi', 'bug'].csv	[' fanIn ', ' fanOut ', 'noai', 'nomi', 'bug']	5	0	0.00151014	38	0	125	0	rbf
Eclipse JDT Core.csv[' fanIn ', ' fanOut ', 'nomi', 'bug'].csv	[' fanIn ', ' fanOut ', 'nomi', 'bug']	4	0.00272541	0.00171658	37	0	119	0	rbf
Eclipse JDT Core.csv[' fanIn ', ' noc ', 'bug'].csv	[' fanIn ', ' noc ', 'bug']	3	0	0.00873218	9	0	18	0	rbf
Eclipse JDT Core.csv[' fanIn ', ' noc ', 'noai', 'bug'].csv	[' fanIn ', ' noc ', 'noai', 'bug']	4	0	0.00249201	27	0	70	0	rbf
Eclipse JDT Core.csv[' fanIn ', ' noc ', 'noai', 'nomi', 'bug'].csv	[' fanIn ', ' noc ', 'noai', 'nomi', 'bug']	5	0	0.00189413	32	0	101	0	sigmoid
Eclipse JDT Core.csv[' fanIn ', ' noc ', 'nomi', 'bug'].csv	[' fanIn ', ' noc ', 'nomi', 'bug']	4	0	0.0025865	28	0	79	0	sigmoid
Eclipse JDT Core.csv[' fanIn ', 'noai', 'bug'].csv	[' fanIn ', 'noai', 'bug']	3	0	0.00322636	23	0	55	0	linear
Eclipse JDT Core.csv[' fanIn ', 'noai', 'nomi', 'bug'].csv	[' fanIn ', 'noai', 'nomi', 'bug']	4	0	0.00206145	30	0	92	0	linear
Eclipse JDT Core.csv[' fanIn ', 'nomi', 'bug'].csv	[' fanIn ', 'nomi', 'bug']	3	0	0.00282081	24	0	66	0	linear
Eclipse JDT Core.csv[' fanOut ', ' noc ', 'bug'].csv	[' fanOut ', ' noc ', 'bug']	3	0	0.00717241	15	0	19	0	sigmoid
Eclipse JDT Core.csv[' fanOut ', ' noc ', 'noai', 'bug'].csv	[' fanOut ', ' noc ', 'noai', 'bug']	4	0	0.00211354	33	0	84	0	rbf
Eclipse JDT Core.csv[' fanOut ', ' noc ', 'noai', 'nomi', 'bug'].csv	[' fanOut ', ' noc ', 'noai', 'nomi', 'bug']	5	0	0.00175334	36	0	109	0	rbf
Eclipse JDT Core.csv[' fanOut ', ' noc ', 'nomi', 'bug'].csv	[' fanOut ', ' noc ', 'nomi', 'bug']	4	0	0.00184683	34	0	100	0	linear
Eclipse JDT Core.csv[' fanOut ', 'noai', 'bug'].csv	[' fanOut ', 'noai', 'bug']	3	0	0.00274408	30	0	68	0	sigmoid
Eclipse JDT Core.csv[' fanOut ', 'noai', 'nomi', 'bug'].csv	[' fanOut ', 'noai', 'nomi', 'bug']	4	0	0.00186115	34	0	99	0	linear
Eclipse JDT Core.csv[' fanOut ', 'nomi', 'bug'].csv	[' fanOut ', 'nomi', 'bug']	3	0	0.00218486	30	0	83	0	linear
Eclipse JDT Core.csv[' noc ', 'noai', 'bug'].csv	[' noc ', 'noai', 'bug']	3	0	0.00529512	17	0	34	0	sigmoid
Eclipse JDT Core.csv[' noc ', 'noai', 'nomi', 'bug'].csv	[' noc ', 'noai', 'nomi', 'bug']	4	0	0.00271216	25	0	70	0	sigmoid
Eclipse JDT Core.csv[' noc ', 'nomi', 'bug'].csv	[' noc ', 'nomi', 'bug']	3	0	0.00453185	14	0	43	0	rbf
Eclipse JDT Core.csv['noai', 'bug'].csv	['noai', 'bug']	2	0	0.00937104	11	0	16	0	linear
Eclipse JDT Core.csv['noai', 'nomi', 'bug'].csv	['noai', 'nomi', 'bug']	3	0	0.00419878	20	0	52	0	sigmoid
Eclipse JDT Core.csv['nomi', 'bug'].csv	['nomi', 'bug']	2	0	0.008749	7	0	23	0	rbf
Eclipse PDE UI.csv[' dit ', ' fanIn ', ' fanOut ', ' noc ', 'bug'].csv	[' dit ', ' fanIn ', ' fanOut ', ' noc ', 'bug']	5	0	0.00169165	24	0	118	0	rbf
Eclipse PDE UI.csv[' dit ', ' fanIn ', ' fanOut ', ' noc ', 'noai', 'bug'].csv	[' dit ', ' fanIn ', ' fanOut ', ' noc ', 'noai', 'bug']	6	0	0.00148304	30	0	143	0	rbf
Eclipse PDE UI.csv[' dit ', ' fanIn ', ' fanOut ', ' noc ', 'noai', 'nomi', 'bug'].csv	[' dit ', ' fanIn ', ' fanOut ', ' noc ', 'noai', 'nomi', 'bug']	7	0	0.00118132	33	0	175	0	linear
Eclipse PDE UI.csv[' dit ', ' fanIn ', ' fanOut ', ' noc ', 'nomi', 'bug'].csv	[' dit ', ' fanIn ', ' fanOut ', ' noc ', 'nomi', 'bug']	6	0	0.00122368	33	0	171	0	rbf
Eclipse PDE UI.csv[' dit ', ' fanIn ', ' fanOut ', 'bug'].csv	[' dit ', ' fanIn ', ' fanOut ', 'bug']	4	0	0.00196398	22	0	96	0	rbf
Eclipse PDE UI.csv[' dit ', ' fanIn ', ' fanOut ', 'noai', 'bug'].csv	[' dit ', ' fanIn ', ' fanOut ', 'noai', 'bug']	5	0	0.00159019	28	0	127	0	sigmoid
Eclipse PDE UI.csv[' dit ', ' fanIn ', ' fanOut ', 'noai', 'nomi', 'bug'].csv	[' dit ', ' fanIn ', ' fanOut ', 'noai', 'nomi', 'bug']	6	0	0.00127141	32	0	165	0	rbf
Eclipse PDE UI.csv[' dit ', ' fanIn ', ' fanOut ', 'nomi', 'bug'].csv	[' dit ', ' fanIn ', ' fanOut ', 'nomi', 'bug']	5	0	0.00127442	31	0	160	0	linear
Eclipse PDE UI.csv[' dit ', ' fanIn ', ' noc ', 'bug'].csv	[' dit ', ' fanIn ', ' noc ', 'bug']	4	0	0.00447561	7	0	45	0	sigmoid
Eclipse PDE UI.csv[' dit ', ' fanIn ', ' noc ', 'noai', 'bug'].csv	[' dit ', ' fanIn ', ' noc ', 'noai', 'bug']	5	0	0.00351264	13	0	71	0	rbf
Eclipse PDE UI.csv[' dit ', ' fanIn ', ' noc ', 'noai', 'nomi', 'bug'].csv	[' dit ', ' fanIn ', ' noc ', 'noai', 'nomi', 'bug']	6	0	0.0019142	20	0	112	0	rbf
Eclipse PDE UI.csv[' dit ', ' fanIn ', ' noc ', 'nomi', 'bug'].csv	[' dit ', ' fanIn ', ' noc ', 'nomi', 'bug']	5	0	0.00213714	17	0	101	0	linear
Eclipse PDE UI.csv[' dit ', ' fanIn ', 'bug'].csv	[' dit ', ' fanIn ', 'bug']	3	0	0.00731683	4	0	24	0	rbf
Eclipse PDE UI.csv[' dit ', ' fanIn ', 'noai', 'bug'].csv	[' dit ', ' fanIn ', 'noai', 'bug']	4	0	0.00379972	10	0	55	0	linear
Eclipse PDE UI.csv[' dit ', ' fanIn ', 'noai', 'nomi', 'bug'].csv	[' dit ', ' fanIn ', 'noai', 'nomi', 'bug']	5	0	0.00243205	18	0	99	0	rbf
Eclipse PDE UI.csv[' dit ', ' fanIn ', 'nomi', 'bug'].csv	[' dit ', ' fanIn ', 'nomi', 'bug']	4	0	0.00247495	14	0	86	0	linear
Eclipse PDE UI.csv[' dit ', ' fanOut ', ' noc ', 'bug'].csv	[' dit ', ' fanOut ', ' noc ', 'bug']	4	0	0.00361542	12	0	55	0	linear
Eclipse PDE UI.csv[' dit ', ' fanOut ', ' noc ', 'noai', 'bug'].csv	[' dit ', ' fanOut ', ' noc ', 'noai', 'bug']	5	0	0.00208529	19	0	97	0	linear
Eclipse PDE UI.csv[' dit ', ' fanOut ', ' noc ', 'noai', 'nomi', 'bug'].csv	[' dit ', ' fanOut ', ' noc ', 'noai', 'nomi', 'bug']	6	0	0.00146318	25	0	140	0	linear
Eclipse PDE UI.csv[' dit ', ' fanOut ', ' noc ', 'nomi', 'bug'].csv	[' dit ', ' fanOut ', ' noc ', 'nomi', 'bug']	5	0	0.00159184	24	0	131	0	linear
Eclipse PDE UI.csv[' dit ', ' fanOut ', 'bug'].csv	[' dit ', ' fanOut ', 'bug']	3	0	0.00725111	8	0	27	0	linear
Eclipse PDE UI.csv[' dit ', ' fanOut ', 'noai', 'bug'].csv	[' dit ', ' fanOut ', 'noai', 'bug']	4	0	0.0027828	15	0	74	0	linear
Eclipse PDE UI.csv[' dit ', ' fanOut ', 'noai', 'nomi', 'bug'].csv	[' dit ', ' fanOut ', 'noai', 'nomi', 'bug']	5	0	0.00163413	23	0	126	0	linear
Eclipse PDE UI.csv[' dit ', ' fanOut ', 'nomi', 'bug'].csv	[' dit ', ' fanOut ', 'nomi', 'bug']	4	0	0.00182221	21	0	113	0	rbf
Eclipse PDE UI.csv[' dit ', ' noc ', 'noai', 'bug'].csv	[' dit ', ' noc ', 'noai', 'bug']	4	0	0.00668224	6	0	37	0	rbf
Eclipse PDE UI.csv[' dit ', ' noc ', 'noai', 'nomi', 'bug'].csv	[' dit ', ' noc ', 'noai', 'nomi', 'bug']	5	0	0.00266831	13	0	79	0	sigmoid
Eclipse PDE UI.csv[' dit ', ' noc ', 'nomi', 'bug'].csv	[' dit ', ' noc ', 'nomi', 'bug']	4	0	0.00358504	9	0	62	0	sigmoid
Eclipse PDE UI.csv[' dit ', 'noai', 'bug'].csv	[' dit ', 'noai', 'bug']	3	0	0.0120015	4	0	19	0	linear
Eclipse PDE UI.csv[' dit ', 'noai', 'nomi', 'bug'].csv	[' dit ', 'noai', 'nomi', 'bug']	4	0	0.00372247	10	0	58	0	linear
Eclipse PDE UI.csv[' dit ', 'nomi', 'bug'].csv	[' dit ', 'nomi', 'bug']	3	0	0.00472669	5	0	40	0	linear
Eclipse PDE UI.csv[' fanIn ', ' fanOut ', ' noc ', 'bug'].csv	[' fanIn ', ' fanOut ', ' noc ', 'bug']	4	0	0.00300198	17	0	71	0	rbf
Eclipse PDE UI.csv[' fanIn ', ' fanOut ', ' noc ', 'noai', 'bug'].csv	[' fanIn ', ' fanOut ', ' noc ', 'noai', 'bug']	5	0	0.00184402	26	0	116	0	sigmoid
Eclipse PDE UI.csv[' fanIn ', ' fanOut ', ' noc ', 'noai', 'nomi', 'bug'].csv	[' fanIn ', ' fanOut ', ' noc ', 'noai', 'nomi', 'bug']	6	0	0.00119613	33	0	173	0	linear
Eclipse PDE UI.csv[' fanIn ', ' fanOut ', ' noc ', 'nomi', 'bug'].csv	[' fanIn ', ' fanOut ', ' noc ', 'nomi', 'bug']	5	0	0.00124177	32	0	166	0	rbf
Eclipse PDE UI.csv[' fanIn ', ' fanOut ', 'bug'].csv	[' fanIn ', ' fanOut ', 'bug']	3	0	0.00412144	13	0	46	0	linear
Eclipse PDE UI.csv[' fanIn ', ' fanOut ', 'noai', 'bug'].csv	[' fanIn ', ' fanOut ', 'noai', 'bug']	4	0	0.00218404	23	0	97	0	sigmoid
Eclipse PDE UI.csv[' fanIn ', ' fanOut ', 'noai', 'nomi', 'bug'].csv	[' fanIn ', ' fanOut ', 'noai', 'nomi', 'bug']	5	0	0.00128885	32	0	161	0	linear
Eclipse PDE UI.csv[' fanIn ', ' fanOut ', 'nomi', 'bug'].csv	[' fanIn ', ' fanOut ', 'nomi', 'bug']	4	0	0.00136682	31	0	154	0	linear
Eclipse PDE UI.csv[' fanIn ', ' noc ', 'bug'].csv	[' fanIn ', ' noc ', 'bug']	3	0	0.00835068	5	0	24	0	sigmoid
Eclipse PDE UI.csv[' fanIn ', ' noc ', 'noai', 'bug'].csv	[' fanIn ', ' noc ', 'noai', 'bug']	4	0	0.00420181	9	0	54	0	rbf
Eclipse PDE UI.csv[' fanIn ', ' noc ', 'noai', 'nomi', 'bug'].csv	[' fanIn ', ' noc ', 'noai', 'nomi', 'bug']	5	0	0.00230155	19	0	106	0	rbf
Eclipse PDE UI.csv[' fanIn ', ' noc ', 'nomi', 'bug'].csv	[' fanIn ', ' noc ', 'nomi', 'bug']	4	0	0.00260523	15	0	89	0	rbf
Eclipse PDE UI.csv[' fanIn ', 'noai', 'bug'].csv	[' fanIn ', 'noai', 'bug']	3	0	0.00639305	6	0	34	0	sigmoid
Eclipse PDE UI.csv[' fanIn ', 'noai', 'nomi', 'bug'].csv	[' fanIn ', 'noai', 'nomi', 'bug']	4	0	0.00246178	17	0	92	0	rbf
Eclipse PDE UI.csv[' fanIn ', 'nomi', 'bug'].csv	[' fanIn ', 'nomi', 'bug']	3	0	0.00293568	11	0	72	0	sigmoid
Eclipse PDE UI.csv[' fanOut ', ' noc ', 'bug'].csv	[' fanOut ', ' noc ', 'bug']	3	0	0.00782366	6	0	23	0	rbf
Eclipse PDE UI.csv[' fanOut ', ' noc ', 'noai', 'bug'].csv	[' fanOut ', ' noc ', 'noai', 'bug']	4	0	0.00314186	14	0	66	0	sigmoid
Eclipse PDE UI.csv[' fanOut ', ' noc ', 'noai', 'nomi', 'bug'].csv	[' fanOut ', ' noc ', 'noai', 'nomi', 'bug']	5	0	0.00153113	25	0	136	0	linear
Eclipse PDE UI.csv[' fanOut ', ' noc ', 'nomi', 'bug'].csv	[' fanOut ', ' noc ', 'nomi', 'bug']	4	0	0.00172567	23	0	121	0	linear
Eclipse PDE UI.csv[' fanOut ', 'noai', 'bug'].csv	[' fanOut ', 'noai', 'bug']	3	0	0.0045713	9	0	43	0	rbf
Eclipse PDE UI.csv[' fanOut ', 'noai', 'nomi', 'bug'].csv	[' fanOut ', 'noai', 'nomi', 'bug']	4	0	0.00176832	23	0	119	0	linear
Eclipse PDE UI.csv[' fanOut ', 'nomi', 'bug'].csv	[' fanOut ', 'nomi', 'bug']	3	0	0.00212879	20	0	98	0	linear
Eclipse PDE UI.csv[' noc ', 'noai', 'bug'].csv	[' noc ', 'noai', 'bug']	3	0	0.00859909	3	0	20	0	sigmoid
Eclipse PDE UI.csv[' noc ', 'noai', 'nomi', 'bug'].csv	[' noc ', 'noai', 'nomi', 'bug']	4	0	0.00278987	11	0	72	0	linear
Eclipse PDE UI.csv[' noc ', 'nomi', 'bug'].csv	[' noc ', 'nomi', 'bug']	3	0	0.00481589	6	0	47	0	linear
Eclipse PDE UI.csv['noai', 'nomi', 'bug'].csv	['noai', 'nomi', 'bug']	3	0	0.00393733	8	0	50	0	sigmoid
Eclipse PDE UI.csv['nomi', 'bug'].csv	['nomi', 'bug']	2	0	0.00887959	3	0	24	0	linear
eclipse34_debug.csv.cvs.csv['dit', 'IFANIN', 'noai', 'bug'].csv	['dit', 'IFANIN', 'noai', 'bug']	4	0.333333	0.00777032	21	0	12	0	poly
eclipse34_debug.csv.cvs.csv['dit', 'IFANIN', 'noc', 'bug'].csv	['dit', 'IFANIN', 'noc', 'bug']	4	0.153846	0.0185485	13	0	11	0	poly
eclipse34_debug.csv.cvs.csv['dit', 'IFANIN', 'noc', 'noai', 'bug'].csv	['dit', 'IFANIN', 'noc', 'noai', 'bug']	5	0.607143	0.00964367	25	3	28	0	poly
eclipse34_debug.csv.cvs.csv['dit', 'IFANIN', 'noc', 'nomi', 'bug'].csv	['dit', 'IFANIN', 'noc', 'nomi', 'bug']	5	0.000526316	0.00277268	38	0	50	0	sigmoid
eclipse34_debug.csv.cvs.csv['dit', 'IFANIN', 'noc', 'nomi', 'noai', 'bug'].csv	['dit', 'IFANIN', 'noc', 'nomi', 'noai', 'bug']	6	0	0.00217908	43	0	74	0	sigmoid
eclipse34_debug.csv.cvs.csv['dit', 'IFANIN', 'nomi', 'bug'].csv	['dit', 'IFANIN', 'nomi', 'bug']	4	0.415404	0.0035245	33	0	24	0	poly
eclipse34_debug.csv.cvs.csv['dit', 'IFANIN', 'nomi', 'noai', 'bug'].csv	['dit', 'IFANIN', 'nomi', 'noai', 'bug']	5	0	0.0028043	40	0	53	0	sigmoid
eclipse34_debug.csv.cvs.csv['dit', 'noc', 'noai', 'bug'].csv	['dit', 'noc', 'noai', 'bug']	4	0.380952	0.00411229	21	0	18	0	poly
eclipse34_debug.csv.cvs.csv['dit', 'noc', 'nomi', 'bug'].csv	['dit', 'noc', 'nomi', 'bug']	4	0	0.00350931	33	0	37	0	linear
eclipse34_debug.csv.cvs.csv['dit', 'noc', 'nomi', 'noai', 'bug'].csv	['dit', 'noc', 'nomi', 'noai', 'bug']	5	0	0.00244129	41	0	61	0	sigmoid
eclipse34_debug.csv.cvs.csv['dit', 'nomi', 'bug'].csv	['dit', 'nomi', 'bug']	3	0.129371	0.00607524	26	0	11	0	poly
eclipse34_debug.csv.cvs.csv['dit', 'nomi', 'noai', 'bug'].csv	['dit', 'nomi', 'noai', 'bug']	4	0.0312945	0.00351782	37	0	38	0	sigmoid
eclipse34_debug.csv.cvs.csv['IFANIN', 'noc', 'noai', 'bug'].csv	['IFANIN', 'noc', 'noai', 'bug']	4	0.0555556	0.0109912	18	0	13	0	poly
eclipse34_debug.csv.cvs.csv['IFANIN', 'noc', 'nomi', 'bug'].csv	['IFANIN', 'noc', 'nomi', 'bug']	4	0.074359	0.0043079	26	0	30	0	rbf
eclipse34_debug.csv.cvs.csv['IFANIN', 'noc', 'nomi', 'noai', 'bug'].csv	['IFANIN', 'noc', 'nomi', 'noai', 'bug']	5	0	0.00291437	36	0	48	0	sigmoid
eclipse34_debug.csv.cvs.csv['IFANIN', 'nomi', 'bug'].csv	['IFANIN', 'nomi', 'bug']	3	0	0.00972021	20	0	7	0	poly
eclipse34_debug.csv.cvs.csv['IFANIN', 'nomi', 'noai', 'bug'].csv	['IFANIN', 'nomi', 'noai', 'bug']	4	0.46875	0.00253868	32	0	26	0	poly
eclipse34_debug.csv.cvs.csv['noc', 'nomi', 'bug'].csv	['noc', 'nomi', 'bug']	3	0.42963	0.00551831	18	0	15	0	poly
eclipse34_debug.csv.cvs.csv['noc', 'nomi', 'noai', 'bug'].csv	['noc', 'nomi', 'noai', 'bug']	4	0.468817	0.00397241	30	0	31	0	rbf
eclipse34_debug.csv.cvs.csv['nomi', 'noai', 'bug'].csv	['nomi', 'noai', 'bug']	3	0	0.0077801	24	0	12	0	poly
eclipse34_swt.csv.cvs.csv['dit', 'IFANIN', 'noai', 'bug'].csv	['dit', 'IFANIN', 'noai', 'bug']	4	0.0322581	0.0062644	31	0	0	9	poly
eclipse34_swt.csv.cvs.csv['dit', 'IFANIN', 'noc', 'bug'].csv	['dit', 'IFANIN', 'noc', 'bug']	4	0	0.00903406	18	0	0	7	poly
eclipse34_swt.csv.cvs.csv['dit', 'IFANIN', 'noc', 'noai', 'bug'].csv	['dit', 'IFANIN', 'noc', 'noai', 'bug']	5	0.214286	0.00341351	42	0	0	21	poly
eclipse34_swt.csv.cvs.csv['dit', 'IFANIN', 'noc', 'nomi', 'bug'].csv	['dit', 'IFANIN', 'noc', 'nomi', 'bug']	5	0.239437	0.00241097	71	0	0	26	poly
eclipse34_swt.csv.cvs.csv['dit', 'IFANIN', 'noc', 'nomi', 'noai', 'bug'].csv	['dit', 'IFANIN', 'noc', 'nomi', 'noai', 'bug']	6	0.231707	0.00165527	82	0	52	0	poly
eclipse34_swt.csv.cvs.csv['dit', 'IFANIN', 'nomi', 'bug'].csv	['dit', 'IFANIN', 'nomi', 'bug']	4	0.157895	0.00316718	57	0	0	11	poly
eclipse34_swt.csv.cvs.csv['dit', 'IFANIN', 'nomi', 'noai', 'bug'].csv	['dit', 'IFANIN', 'nomi', 'noai', 'bug']	5	0.166667	0.00230832	72	0	37	0	poly
eclipse34_swt.csv.cvs.csv['dit', 'noai', 'bug'].csv	['dit', 'noai', 'bug']	3	0	0.00756076	29	0	0	6	poly
eclipse34_swt.csv.cvs.csv['dit', 'noc', 'bug'].csv	['dit', 'noc', 'bug']	3	0	0.0115531	17	0	0	5	poly
eclipse34_swt.csv.cvs.csv['dit', 'noc', 'noai', 'bug'].csv	['dit', 'noc', 'noai', 'bug']	4	0.0243902	0.00441119	41	0	17	0	poly
eclipse34_swt.csv.cvs.csv['dit', 'noc', 'nomi', 'bug'].csv	['dit', 'noc', 'nomi', 'bug']	4	0.1	0.00264397	70	0	23	0	poly
eclipse34_swt.csv.cvs.csv['dit', 'noc', 'nomi', 'noai', 'bug'].csv	['dit', 'noc', 'nomi', 'noai', 'bug']	5	0.219512	0.00161777	82	0	50	0	poly
eclipse34_swt.csv.cvs.csv['dit', 'nomi', 'bug'].csv	['dit', 'nomi', 'bug']	3	0.0363636	0.00407756	55	0	8	0	poly
eclipse34_swt.csv.cvs.csv['dit', 'nomi', 'noai', 'bug'].csv	['dit', 'nomi', 'noai', 'bug']	4	0.0972222	0.00241281	72	0	33	0	poly
eclipse34_swt.csv.cvs.csv['IFANIN', 'noc', 'noai', 'bug'].csv	['IFANIN', 'noc', 'noai', 'bug']	4	0	0.00685389	22	0	0	12	poly
eclipse34_swt.csv.cvs.csv['IFANIN', 'noc', 'nomi', 'bug'].csv	['IFANIN', 'noc', 'nomi', 'bug']	4	0.139535	0.00427137	43	0	0	14	poly
eclipse34_swt.csv.cvs.csv['IFANIN', 'noc', 'nomi', 'noai', 'bug'].csv	['IFANIN', 'noc', 'nomi', 'noai', 'bug']	5	0.123077	0.00249115	65	0	35	0	poly
eclipse34_swt.csv.cvs.csv['IFANIN', 'nomi', 'bug'].csv	['IFANIN', 'nomi', 'bug']	3	0.106667	0.0105759	25	0	0	3	poly
eclipse34_swt.csv.cvs.csv['IFANIN', 'nomi', 'noai', 'bug'].csv	['IFANIN', 'nomi', 'noai', 'bug']	4	0.0980392	0.00328181	51	0	21	0	poly
eclipse34_swt.csv.cvs.csv['noc', 'noai', 'bug'].csv	['noc', 'noai', 'bug']	3	0	0.00965632	19	0	8	0	poly
eclipse34_swt.csv.cvs.csv['noc', 'nomi', 'bug'].csv	['noc', 'nomi', 'bug']	3	0	0.00506917	40	0	10	0	poly
eclipse34_swt.csv.cvs.csv['noc', 'nomi', 'noai', 'bug'].csv	['noc', 'nomi', 'noai', 'bug']	4	0	0.00267973	65	0	30	0	poly
eclipse34_swt.csv.cvs.csv['nomi', 'noai', 'bug'].csv	['nomi', 'noai', 'bug']	3	1	0.00385868	49	0	17	0	poly
Equinox Framework.csv[' dit ', ' fanIn ', ' fanOut ', ' noc ', 'bug'].csv	[' dit ', ' fanIn ', ' fanOut ', ' noc ', 'bug']	5	0.210526	0.0105735	19	0	0	15	poly
Equinox Framework.csv[' dit ', ' fanIn ', ' fanOut ', ' noc ', 'noai', 'bug'].csv	[' dit ', ' fanIn ', ' fanOut ', ' noc ', 'noai', 'bug']	6	0.380952	0.00812627	21	0	0	16	poly
Equinox Framework.csv[' dit ', ' fanIn ', ' fanOut ', ' noc ', 'noai', 'nomi', 'bug'].csv	[' dit ', ' fanIn ', ' fanOut ', ' noc ', 'noai', 'nomi', 'bug']	7	0.826389	0.00506521	24	0	24	0	sigmoid
Equinox Framework.csv[' dit ', ' fanIn ', ' fanOut ', ' noc ', 'nomi', 'bug'].csv	[' dit ', ' fanIn ', ' fanOut ', ' noc ', 'nomi', 'bug']	6	0.603261	0.00531609	24	0	23	0	sigmoid
Equinox Framework.csv[' dit ', ' fanIn ', ' fanOut ', 'bug'].csv	[' dit ', ' fanIn ', ' fanOut ', 'bug']	4	0.210526	0.0122828	19	0	14	0	poly
Equinox Framework.csv[' dit ', ' fanIn ', ' fanOut ', 'noai', 'bug'].csv	[' dit ', ' fanIn ', ' fanOut ', 'noai', 'bug']	5	0.3	0.0160323	20	0	0	15	poly
Equinox Framework.csv[' dit ', ' fanIn ', ' fanOut ', 'noai', 'nomi', 'bug'].csv	[' dit ', ' fanIn ', ' fanOut ', 'noai', 'nomi', 'bug']	6	0.655303	0.00536611	24	0	22	0	rbf
Equinox Framework.csv[' dit ', ' fanIn ', ' fanOut ', 'nomi', 'bug'].csv	[' dit ', ' fanIn ', ' fanOut ', 'nomi', 'bug']	5	0.0473485	0.229362	13	11	22	0	poly
Equinox Framework.csv[' dit ', ' fanIn ', ' noc ', 'noai', 'nomi', 'bug'].csv	[' dit ', ' fanIn ', ' noc ', 'noai', 'nomi', 'bug']	6	0.761905	0.00857621	18	0	14	0	rbf
Equinox Framework.csv[' dit ', ' fanIn ', ' noc ', 'nomi', 'bug'].csv	[' dit ', ' fanIn ', ' noc ', 'nomi', 'bug']	5	0.4375	0.0337377	16	0	0	14	poly
Equinox Framework.csv[' dit ', ' fanIn ', 'noai', 'nomi', 'bug'].csv	[' dit ', ' fanIn ', 'noai', 'nomi', 'bug']	5	0.0588235	0.077571	17	0	0	13	poly
Equinox Framework.csv[' dit ', ' fanIn ', 'nomi', 'bug'].csv	[' dit ', ' fanIn ', 'nomi', 'bug']	4	0.466667	0.00793412	15	0	13	0	poly
Equinox Framework.csv[' dit ', ' fanOut ', ' noc ', 'noai', 'bug'].csv	[' dit ', ' fanOut ', ' noc ', 'noai', 'bug']	5	0.214286	0.0176696	14	0	0	8	poly
Equinox Framework.csv[' dit ', ' fanOut ', ' noc ', 'noai', 'nomi', 'bug'].csv	[' dit ', ' fanOut ', ' noc ', 'noai', 'nomi', 'bug']	6	0.333333	0.0124753	21	0	0	18	poly
Equinox Framework.csv[' dit ', ' fanOut ', ' noc ', 'nomi', 'bug'].csv	[' dit ', ' fanOut ', ' noc ', 'nomi', 'bug']	5	0.05	0.0366024	20	0	18	0	poly
Equinox Framework.csv[' dit ', ' fanOut ', 'noai', 'nomi', 'bug'].csv	[' dit ', ' fanOut ', 'noai', 'nomi', 'bug']	5	0.263158	0.0641849	19	0	0	17	poly
Equinox Framework.csv[' dit ', ' fanOut ', 'nomi', 'bug'].csv	[' dit ', ' fanOut ', 'nomi', 'bug']	4	0.222222	0.0459391	18	0	16	0	poly
Equinox Framework.csv[' fanIn ', ' fanOut ', ' noc ', 'bug'].csv	[' fanIn ', ' fanOut ', ' noc ', 'bug']	4	0.117647	0.01189	17	0	0	12	poly
Equinox Framework.csv[' fanIn ', ' fanOut ', ' noc ', 'noai', 'bug'].csv	[' fanIn ', ' fanOut ', ' noc ', 'noai', 'bug']	5	0.35	0.00337445	20	0	0	15	poly
Equinox Framework.csv[' fanIn ', ' fanOut ', ' noc ', 'noai', 'nomi', 'bug'].csv	[' fanIn ', ' fanOut ', ' noc ', 'noai', 'nomi', 'bug']	6	0.983696	0.00525112	24	0	23	0	sigmoid
Equinox Framework.csv[' fanIn ', ' fanOut ', ' noc ', 'nomi', 'bug'].csv	[' fanIn ', ' fanOut ', ' noc ', 'nomi', 'bug']	5	0.0833333	0.176011	24	0	23	0	poly
Equinox Framework.csv[' fanIn ', ' fanOut ', 'bug'].csv	[' fanIn ', ' fanOut ', 'bug']	3	0.125	0.00697587	16	0	11	0	poly
Equinox Framework.csv[' fanIn ', ' fanOut ', 'noai', 'bug'].csv	[' fanIn ', ' fanOut ', 'noai', 'bug']	4	0.0526316	0.00832568	19	0	15	0	poly
Equinox Framework.csv[' fanIn ', ' fanOut ', 'noai', 'nomi', 'bug'].csv	[' fanIn ', ' fanOut ', 'noai', 'nomi', 'bug']	5	0.515152	0.00556774	24	0	22	0	rbf
Equinox Framework.csv[' fanIn ', ' fanOut ', 'nomi', 'bug'].csv	[' fanIn ', ' fanOut ', 'nomi', 'bug']	4	0.583333	0.00123964	24	0	22	0	poly
Equinox Framework.csv[' fanIn ', ' noc ', 'noai', 'nomi', 'bug'].csv	[' fanIn ', ' noc ', 'noai', 'nomi', 'bug']	5	0.0588235	0.00744684	17	0	0	14	poly
Equinox Framework.csv[' fanIn ', ' noc ', 'nomi', 'bug'].csv	[' fanIn ', ' noc ', 'nomi', 'bug']	4	0.3125	0.00547697	16	0	12	0	poly
Equinox Framework.csv[' fanIn ', 'noai', 'nomi', 'bug'].csv	[' fanIn ', 'noai', 'nomi', 'bug']	4	0.294118	0.00327056	17	0	0	12	poly
Equinox Framework.csv[' fanIn ', 'nomi', 'bug'].csv	[' fanIn ', 'nomi', 'bug']	3	0.214286	0.00756337	14	0	12	0	poly
Equinox Framework.csv[' fanOut ', ' noc ', 'noai', 'nomi', 'bug'].csv	[' fanOut ', ' noc ', 'noai', 'nomi', 'bug']	5	0.238095	0.0114627	21	0	0	18	poly
Equinox Framework.csv[' fanOut ', ' noc ', 'nomi', 'bug'].csv	[' fanOut ', ' noc ', 'nomi', 'bug']	4	0.05	0.0171246	20	0	17	0	poly
Equinox Framework.csv[' fanOut ', 'noai', 'nomi', 'bug'].csv	[' fanOut ', 'noai', 'nomi', 'bug']	4	0.631579	0.000880152	19	0	17	0	poly
Equinox Framework.csv[' fanOut ', 'nomi', 'bug'].csv	[' fanOut ', 'nomi', 'bug']	3	0.981481	0.00759361	18	0	15	0	rbf
jedit-3.2.csv['dit', 'mfa', 'ic', 'bug'].csv	['dit', 'mfa', 'ic', 'bug']	4	0.340278	0.010145	12	0	12	0	sigmoid
jedit-3.2.csv['dit', 'noc', 'mfa', 'bug'].csv	['dit', 'noc', 'mfa', 'bug']	4	0.208333	0.0133022	10	0	12	0	sigmoid
jedit-3.2.csv['dit', 'noc', 'mfa', 'ic', 'bug'].csv	['dit', 'noc', 'mfa', 'ic', 'bug']	5	0.202381	0.00945522	12	0	14	0	sigmoid
jedit-3.2.csv['mfa', 'ic', 'bug'].csv	['mfa', 'ic', 'bug']	3	1	0.0112156	12	0	11	0	linear
jedit-3.2.csv['noc', 'mfa', 'ic', 'bug'].csv	['noc', 'mfa', 'ic', 'bug']	4	0.102564	0.0101391	12	0	13	0	sigmoid
Lucene.csv[' dit ', ' fanIn ', ' fanOut ', ' noc ', 'bug'].csv	[' dit ', ' fanIn ', ' fanOut ', ' noc ', 'bug']	5	0	0.00353287	9	0	56	0	sigmoid
Lucene.csv[' dit ', ' fanIn ', ' fanOut ', ' noc ', 'noai', 'bug'].csv	[' dit ', ' fanIn ', ' fanOut ', ' noc ', 'noai', 'bug']	6	0	0.00311642	10	0	69	0	sigmoid
Lucene.csv[' dit ', ' fanIn ', ' fanOut ', ' noc ', 'noai', 'nomi', 'bug'].csv	[' dit ', ' fanIn ', ' fanOut ', ' noc ', 'noai', 'nomi', 'bug']	7	0	0.00260728	11	0	90	0	rbf
Lucene.csv[' dit ', ' fanIn ', ' fanOut ', ' noc ', 'nomi', 'bug'].csv	[' dit ', ' fanIn ', ' fanOut ', ' noc ', 'nomi', 'bug']	6	0	0.00246238	11	0	88	0	sigmoid
Lucene.csv[' dit ', ' fanIn ', ' fanOut ', 'bug'].csv	[' dit ', ' fanIn ', ' fanOut ', 'bug']	4	0	0.0042191	8	0	46	0	sigmoid
Lucene.csv[' dit ', ' fanIn ', ' fanOut ', 'noai', 'bug'].csv	[' dit ', ' fanIn ', ' fanOut ', 'noai', 'bug']	5	0	0.00408753	9	0	61	0	rbf
Lucene.csv[' dit ', ' fanIn ', ' fanOut ', 'noai', 'nomi', 'bug'].csv	[' dit ', ' fanIn ', ' fanOut ', 'noai', 'nomi', 'bug']	6	0	0.00307174	11	0	84	0	rbf
Lucene.csv[' dit ', ' fanIn ', ' fanOut ', 'nomi', 'bug'].csv	[' dit ', ' fanIn ', ' fanOut ', 'nomi', 'bug']	5	0	0.00271662	11	0	82	0	linear
Lucene.csv[' dit ', ' fanIn ', ' noc ', 'bug'].csv	[' dit ', ' fanIn ', ' noc ', 'bug']	4	0	0.00911119	6	0	22	0	linear
Lucene.csv[' dit ', ' fanIn ', ' noc ', 'noai', 'bug'].csv	[' dit ', ' fanIn ', ' noc ', 'noai', 'bug']	5	0	0.00578172	7	0	34	0	sigmoid
Lucene.csv[' dit ', ' fanIn ', ' noc ', 'noai', 'nomi', 'bug'].csv	[' dit ', ' fanIn ', ' noc ', 'noai', 'nomi', 'bug']	6	0	0.00346388	8	0	60	0	rbf
Lucene.csv[' dit ', ' fanIn ', ' noc ', 'nomi', 'bug'].csv	[' dit ', ' fanIn ', ' noc ', 'nomi', 'bug']	5	0	0.00358439	7	0	55	0	linear
Lucene.csv[' dit ', ' fanIn ', 'noai', 'bug'].csv	[' dit ', ' fanIn ', 'noai', 'bug']	4	0	0.00859325	5	0	24	0	rbf
Lucene.csv[' dit ', ' fanIn ', 'noai', 'nomi', 'bug'].csv	[' dit ', ' fanIn ', 'noai', 'nomi', 'bug']	5	0	0.00382706	7	0	51	0	linear
Lucene.csv[' dit ', ' fanIn ', 'nomi', 'bug'].csv	[' dit ', ' fanIn ', 'nomi', 'bug']	4	0	0.0047791	7	0	46	0	rbf
Lucene.csv[' dit ', ' fanOut ', ' noc ', 'bug'].csv	[' dit ', ' fanOut ', ' noc ', 'bug']	4	0	0.00912773	6	0	22	0	rbf
Lucene.csv[' dit ', ' fanOut ', ' noc ', 'noai', 'bug'].csv	[' dit ', ' fanOut ', ' noc ', 'noai', 'bug']	5	0	0.00574662	8	0	37	0	rbf
Lucene.csv[' dit ', ' fanOut ', ' noc ', 'noai', 'nomi', 'bug'].csv	[' dit ', ' fanOut ', ' noc ', 'noai', 'nomi', 'bug']	6	0	0.00354875	9	0	64	0	rbf
Lucene.csv[' dit ', ' fanOut ', ' noc ', 'nomi', 'bug'].csv	[' dit ', ' fanOut ', ' noc ', 'nomi', 'bug']	5	0	0.00330651	9	0	60	0	sigmoid
Lucene.csv[' dit ', ' fanOut ', 'noai', 'bug'].csv	[' dit ', ' fanOut ', 'noai', 'bug']	4	0	0.0066341	4	0	26	0	rbf
Lucene.csv[' dit ', ' fanOut ', 'noai', 'nomi', 'bug'].csv	[' dit ', ' fanOut ', 'noai', 'nomi', 'bug']	5	0	0.00388639	7	0	54	0	linear
Lucene.csv[' dit ', ' fanOut ', 'nomi', 'bug'].csv	[' dit ', ' fanOut ', 'nomi', 'bug']	4	0	0.00508911	7	0	49	0	rbf
Lucene.csv[' dit ', ' noc ', 'noai', 'nomi', 'bug'].csv	[' dit ', ' noc ', 'noai', 'nomi', 'bug']	5	0	0.00584685	5	0	33	0	linear
Lucene.csv[' dit ', ' noc ', 'nomi', 'bug'].csv	[' dit ', ' noc ', 'nomi', 'bug']	4	0	0.00822666	5	0	27	0	sigmoid
Lucene.csv[' dit ', 'noai', 'nomi', 'bug'].csv	[' dit ', 'noai', 'nomi', 'bug']	4	0	0.00723147	2	0	22	0	linear
Lucene.csv[' fanIn ', ' fanOut ', ' noc ', 'bug'].csv	[' fanIn ', ' fanOut ', ' noc ', 'bug']	4	0	0.00527392	8	0	38	0	rbf
Lucene.csv[' fanIn ', ' fanOut ', ' noc ', 'noai', 'bug'].csv	[' fanIn ', ' fanOut ', ' noc ', 'noai', 'bug']	5	0	0.00410107	9	0	55	0	sigmoid
Lucene.csv[' fanIn ', ' fanOut ', ' noc ', 'noai', 'nomi', 'bug'].csv	[' fanIn ', ' fanOut ', ' noc ', 'noai', 'nomi', 'bug']	6	0	0.00244825	11	0	89	0	sigmoid
Lucene.csv[' fanIn ', ' fanOut ', ' noc ', 'nomi', 'bug'].csv	[' fanIn ', ' fanOut ', ' noc ', 'nomi', 'bug']	5	0	0.00253686	11	0	85	0	sigmoid
Lucene.csv[' fanIn ', ' fanOut ', 'bug'].csv	[' fanIn ', ' fanOut ', 'bug']	3	0	0.00779091	7	0	28	0	rbf
Lucene.csv[' fanIn ', ' fanOut ', 'noai', 'bug'].csv	[' fanIn ', ' fanOut ', 'noai', 'bug']	4	0	0.00504381	8	0	46	0	rbf
Lucene.csv[' fanIn ', ' fanOut ', 'noai', 'nomi', 'bug'].csv	[' fanIn ', ' fanOut ', 'noai', 'nomi', 'bug']	5	0	0.00242987	10	0	84	0	sigmoid
Lucene.csv[' fanIn ', ' fanOut ', 'nomi', 'bug'].csv	[' fanIn ', ' fanOut ', 'nomi', 'bug']	4	0	0.00255817	10	0	80	0	sigmoid
Lucene.csv[' fanIn ', ' noc ', 'noai', 'bug'].csv	[' fanIn ', ' noc ', 'noai', 'bug']	4	0	0.00824573	6	0	25	0	rbf
Lucene.csv[' fanIn ', ' noc ', 'noai', 'nomi', 'bug'].csv	[' fanIn ', ' noc ', 'noai', 'nomi', 'bug']	5	0	0.0039007	8	0	57	0	linear
Lucene.csv[' fanIn ', ' noc ', 'nomi', 'bug'].csv	[' fanIn ', ' noc ', 'nomi', 'bug']	4	0	0.0042285	7	0	49	0	linear
Lucene.csv[' fanIn ', 'noai', 'bug'].csv	[' fanIn ', 'noai', 'bug']	3	0	0.0117057	4	0	16	0	sigmoid
Lucene.csv[' fanIn ', 'noai', 'nomi', 'bug'].csv	[' fanIn ', 'noai', 'nomi', 'bug']	4	0	0.00431692	7	0	48	0	linear
Lucene.csv[' fanIn ', 'nomi', 'bug'].csv	[' fanIn ', 'nomi', 'bug']	3	0	0.00589605	6	0	40	0	rbf
Lucene.csv[' fanOut ', ' noc ', 'noai', 'bug'].csv	[' fanOut ', ' noc ', 'noai', 'bug']	4	0	0.00799378	6	0	26	0	rbf
Lucene.csv[' fanOut ', ' noc ', 'noai', 'nomi', 'bug'].csv	[' fanOut ', ' noc ', 'noai', 'nomi', 'bug']	5	0	0.00352265	9	0	62	0	sigmoid
Lucene.csv[' fanOut ', ' noc ', 'nomi', 'bug'].csv	[' fanOut ', ' noc ', 'nomi', 'bug']	4	0	0.00368464	8	0	55	0	linear
Lucene.csv[' fanOut ', 'noai', 'nomi', 'bug'].csv	[' fanOut ', 'noai', 'nomi', 'bug']	4	0	0.00459975	7	0	52	0	rbf
Lucene.csv[' fanOut ', 'nomi', 'bug'].csv	[' fanOut ', 'nomi', 'bug']	3	0	0.00520355	6	0	43	0	linear
Lucene.csv[' noc ', 'noai', 'nomi', 'bug'].csv	[' noc ', 'noai', 'nomi', 'bug']	4	0	0.0070566	5	0	30	0	sigmoid
Lucene.csv[' noc ', 'nomi', 'bug'].csv	[' noc ', 'nomi', 'bug']	3	0	0.00944713	4	0	21	0	sigmoid
Lucene.csv['noai', 'nomi', 'bug'].csv	['noai', 'nomi', 'bug']	3	0	0.00951586	2	0	18	0	linear
Mylyn.csv[' dit ', ' fanIn ', ' fanOut ', ' noc ', 'bug'].csv	[' dit ', ' fanIn ', ' fanOut ', ' noc ', 'bug']	5	0	0.00225967	24	0	91	0	sigmoid
Mylyn.csv[' dit ', ' fanIn ', ' fanOut ', ' noc ', 'noai', 'bug'].csv	[' dit ', ' fanIn ', ' fanOut ', ' noc ', 'noai', 'bug']	6	0	0.00180375	26	0	112	0	linear
Mylyn.csv[' dit ', ' fanIn ', ' fanOut ', ' noc ', 'noai', 'nomi', 'bug'].csv	[' dit ', ' fanIn ', ' fanOut ', ' noc ', 'noai', 'nomi', 'bug']	7	0	0.00122464	31	0	168	0	sigmoid
Mylyn.csv[' dit ', ' fanIn ', ' fanOut ', ' noc ', 'nomi', 'bug'].csv	[' dit ', ' fanIn ', ' fanOut ', ' noc ', 'nomi', 'bug']	6	0	0.00122449	31	0	166	0	rbf
Mylyn.csv[' dit ', ' fanIn ', ' fanOut ', 'bug'].csv	[' dit ', ' fanIn ', ' fanOut ', 'bug']	4	0	0.00286356	22	0	69	0	sigmoid
Mylyn.csv[' dit ', ' fanIn ', ' fanOut ', 'noai', 'bug'].csv	[' dit ', ' fanIn ', ' fanOut ', 'noai', 'bug']	5	0	0.00216175	24	0	91	0	linear
Mylyn.csv[' dit ', ' fanIn ', ' fanOut ', 'noai', 'nomi', 'bug'].csv	[' dit ', ' fanIn ', ' fanOut ', 'noai', 'nomi', 'bug']	6	0	0.00138364	30	0	151	0	rbf
Mylyn.csv[' dit ', ' fanIn ', ' fanOut ', 'nomi', 'bug'].csv	[' dit ', ' fanIn ', ' fanOut ', 'nomi', 'bug']	5	0	0.00138565	30	0	148	0	linear
Mylyn.csv[' dit ', ' fanIn ', ' noc ', 'bug'].csv	[' dit ', ' fanIn ', ' noc ', 'bug']	4	0	0.00657253	7	0	33	0	sigmoid
Mylyn.csv[' dit ', ' fanIn ', ' noc ', 'noai', 'bug'].csv	[' dit ', ' fanIn ', ' noc ', 'noai', 'bug']	5	0	0.00380498	9	0	49	0	rbf
Mylyn.csv[' dit ', ' fanIn ', ' noc ', 'noai', 'nomi', 'bug'].csv	[' dit ', ' fanIn ', ' noc ', 'noai', 'nomi', 'bug']	6	0	0.00205805	18	0	101	0	linear
Mylyn.csv[' dit ', ' fanIn ', ' noc ', 'nomi', 'bug'].csv	[' dit ', ' fanIn ', ' noc ', 'nomi', 'bug']	5	0	0.00220211	17	0	94	0	linear
Mylyn.csv[' dit ', ' fanIn ', 'bug'].csv	[' dit ', ' fanIn ', 'bug']	3	0	0.0121958	5	0	16	0	linear
Mylyn.csv[' dit ', ' fanIn ', 'noai', 'bug'].csv	[' dit ', ' fanIn ', 'noai', 'bug']	4	0	0.00717157	7	0	33	0	rbf
Mylyn.csv[' dit ', ' fanIn ', 'noai', 'nomi', 'bug'].csv	[' dit ', ' fanIn ', 'noai', 'nomi', 'bug']	5	0	0.00251716	17	0	82	0	rbf
Mylyn.csv[' dit ', ' fanIn ', 'nomi', 'bug'].csv	[' dit ', ' fanIn ', 'nomi', 'bug']	4	0	0.00270589	15	0	75	0	sigmoid
Mylyn.csv[' dit ', ' fanOut ', ' noc ', 'bug'].csv	[' dit ', ' fanOut ', ' noc ', 'bug']	4	0	0.00534933	10	0	35	0	linear
Mylyn.csv[' dit ', ' fanOut ', ' noc ', 'noai', 'bug'].csv	[' dit ', ' fanOut ', ' noc ', 'noai', 'bug']	5	0	0.00364166	13	0	55	0	linear
Mylyn.csv[' dit ', ' fanOut ', ' noc ', 'noai', 'nomi', 'bug'].csv	[' dit ', ' fanOut ', ' noc ', 'noai', 'nomi', 'bug']	6	0	0.00183846	22	0	113	0	linear
Mylyn.csv[' dit ', ' fanOut ', ' noc ', 'nomi', 'bug'].csv	[' dit ', ' fanOut ', ' noc ', 'nomi', 'bug']	5	0	0.00189868	21	0	108	0	rbf
Mylyn.csv[' dit ', ' fanOut ', 'bug'].csv	[' dit ', ' fanOut ', 'bug']	3	0	0.0106661	7	0	16	0	linear
Mylyn.csv[' dit ', ' fanOut ', 'noai', 'bug'].csv	[' dit ', ' fanOut ', 'noai', 'bug']	4	0	0.00511156	10	0	36	0	linear
Mylyn.csv[' dit ', ' fanOut ', 'noai', 'nomi', 'bug'].csv	[' dit ', ' fanOut ', 'noai', 'nomi', 'bug']	5	0	0.00216204	19	0	93	0	rbf
Mylyn.csv[' dit ', ' fanOut ', 'nomi', 'bug'].csv	[' dit ', ' fanOut ', 'nomi', 'bug']	4	0	0.0023737	19	0	87	0	rbf
Mylyn.csv[' dit ', ' noc ', 'noai', 'bug'].csv	[' dit ', ' noc ', 'noai', 'bug']	4	0	0.011112	3	0	17	0	linear
Mylyn.csv[' dit ', ' noc ', 'noai', 'nomi', 'bug'].csv	[' dit ', ' noc ', 'noai', 'nomi', 'bug']	5	0	0.00397114	7	0	51	0	sigmoid
Mylyn.csv[' dit ', ' noc ', 'nomi', 'bug'].csv	[' dit ', ' noc ', 'nomi', 'bug']	4	0	0.00446761	6	0	43	0	sigmoid
Mylyn.csv[' dit ', 'noai', 'nomi', 'bug'].csv	[' dit ', 'noai', 'nomi', 'bug']	4	0	0.00553478	4	0	35	0	linear
Mylyn.csv[' dit ', 'nomi', 'bug'].csv	[' dit ', 'nomi', 'bug']	3	0	0.00712489	3	0	26	0	linear
Mylyn.csv[' fanIn ', ' fanOut ', ' noc ', 'bug'].csv	[' fanIn ', ' fanOut ', ' noc ', 'bug']	4	0	0.00293891	21	0	65	0	sigmoid
Mylyn.csv[' fanIn ', ' fanOut ', ' noc ', 'noai', 'bug'].csv	[' fanIn ', ' fanOut ', ' noc ', 'noai', 'bug']	5	0	0.00213556	23	0	91	0	rbf
Mylyn.csv[' fanIn ', ' fanOut ', ' noc ', 'noai', 'nomi', 'bug'].csv	[' fanIn ', ' fanOut ', ' noc ', 'noai', 'nomi', 'bug']	6	0	0.00122845	31	0	165	0	sigmoid
Mylyn.csv[' fanIn ', ' fanOut ', ' noc ', 'nomi', 'bug'].csv	[' fanIn ', ' fanOut ', ' noc ', 'nomi', 'bug']	5	0	0.00128475	31	0	161	0	sigmoid
Mylyn.csv[' fanIn ', ' fanOut ', 'bug'].csv	[' fanIn ', ' fanOut ', 'bug']	3	0	0.00404648	18	0	44	0	sigmoid
Mylyn.csv[' fanIn ', ' fanOut ', 'noai', 'bug'].csv	[' fanIn ', ' fanOut ', 'noai', 'bug']	4	0	0.00273014	21	0	70	0	linear
Mylyn.csv[' fanIn ', ' fanOut ', 'noai', 'nomi', 'bug'].csv	[' fanIn ', ' fanOut ', 'noai', 'nomi', 'bug']	5	0	0.00138342	30	0	147	0	linear
Mylyn.csv[' fanIn ', ' fanOut ', 'nomi', 'bug'].csv	[' fanIn ', ' fanOut ', 'nomi', 'bug']	4	0	0.00144258	30	0	142	0	sigmoid
Mylyn.csv[' fanIn ', ' noc ', 'bug'].csv	[' fanIn ', ' noc ', 'bug']	3	0	0.00986007	6	0	22	0	rbf
Mylyn.csv[' fanIn ', ' noc ', 'noai', 'bug'].csv	[' fanIn ', ' noc ', 'noai', 'bug']	4	0	0.00590584	8	0	35	0	linear
Mylyn.csv[' fanIn ', ' noc ', 'noai', 'nomi', 'bug'].csv	[' fanIn ', ' noc ', 'noai', 'nomi', 'bug']	5	0	0.00216285	16	0	93	0	sigmoid
Mylyn.csv[' fanIn ', ' noc ', 'nomi', 'bug'].csv	[' fanIn ', ' noc ', 'nomi', 'bug']	4	0	0.00266571	15	0	81	0	rbf
Mylyn.csv[' fanIn ', 'noai', 'bug'].csv	[' fanIn ', 'noai', 'bug']	3	0	0.00990764	6	0	20	0	rbf
Mylyn.csv[' fanIn ', 'noai', 'nomi', 'bug'].csv	[' fanIn ', 'noai', 'nomi', 'bug']	4	0	0.00277088	15	0	73	0	linear
Mylyn.csv[' fanIn ', 'nomi', 'bug'].csv	[' fanIn ', 'nomi', 'bug']	3	0	0.00349446	13	0	60	0	rbf
Mylyn.csv[' fanOut ', ' noc ', 'bug'].csv	[' fanOut ', ' noc ', 'bug']	3	0	0.00804675	5	0	21	0	sigmoid
Mylyn.csv[' fanOut ', ' noc ', 'noai', 'bug'].csv	[' fanOut ', ' noc ', 'noai', 'bug']	4	0	0.00489231	9	0	40	0	linear
Mylyn.csv[' fanOut ', ' noc ', 'noai', 'nomi', 'bug'].csv	[' fanOut ', ' noc ', 'noai', 'nomi', 'bug']	5	0	0.00191298	21	0	106	0	linear
Mylyn.csv[' fanOut ', ' noc ', 'nomi', 'bug'].csv	[' fanOut ', ' noc ', 'nomi', 'bug']	4	0	0.00211298	20	0	96	0	sigmoid
Mylyn.csv[' fanOut ', 'noai', 'bug'].csv	[' fanOut ', 'noai', 'bug']	3	0	0.0079061	7	0	23	0	linear
Mylyn.csv[' fanOut ', 'noai', 'nomi', 'bug'].csv	[' fanOut ', 'noai', 'nomi', 'bug']	4	0	0.00236799	19	0	85	0	rbf
Mylyn.csv[' fanOut ', 'nomi', 'bug'].csv	[' fanOut ', 'nomi', 'bug']	3	0	0.0027753	18	0	73	0	sigmoid
Mylyn.csv[' noc ', 'noai', 'nomi', 'bug'].csv	[' noc ', 'noai', 'nomi', 'bug']	4	0	0.00499307	6	0	43	0	linear
Mylyn.csv[' noc ', 'nomi', 'bug'].csv	[' noc ', 'nomi', 'bug']	3	0	0.00678361	5	0	31	0	linear
Mylyn.csv['noai', 'nomi', 'bug'].csv	['noai', 'nomi', 'bug']	3	0	0.00868084	3	0	27	0	rbf
prop-1.csv['dit', 'mfa', 'bug'].csv	['dit', 'mfa', 'bug']	3	0	0.00125003	49	0	158	0	rbf
prop-1.csv['dit', 'mfa', 'ic', 'bug'].csv	['dit', 'mfa', 'ic', 'bug']	4	0	0.000883099	68	0	215	0	rbf
prop-1.csv['dit', 'noc', 'bug'].csv	['dit', 'noc', 'bug']	3	0	0.0102983	4	0	18	0	sigmoid
prop-1.csv['dit', 'noc', 'ic', 'bug'].csv	['dit', 'noc', 'ic', 'bug']	4	0	0.00709153	6	0	30	0	linear
prop-1.csv['dit', 'noc', 'mfa', 'bug'].csv	['dit', 'noc', 'mfa', 'bug']	4	0	0.00088743	62	0	216	0	rbf
prop-1.csv['dit', 'noc', 'mfa', 'ic', 'bug'].csv	['dit', 'noc', 'mfa', 'ic', 'bug']	5	0.0126582	0.000723343	79	0	271	0	rbf
prop-1.csv['mfa', 'bug'].csv	['mfa', 'bug']	2	0.333333	0.00242254	33	0	105	0	sigmoid
prop-1.csv['mfa', 'ic', 'bug'].csv	['mfa', 'ic', 'bug']	3	0	0.00115577	52	0	165	0	linear
prop-1.csv['noc', 'mfa', 'bug'].csv	['noc', 'mfa', 'bug']	3	0	0.00123457	47	0	162	0	rbf
prop-1.csv['noc', 'mfa', 'ic', 'bug'].csv	['noc', 'mfa', 'ic', 'bug']	4	0	0.000867884	64	0	225	0	rbf
single-version-ck-oo.csv[' dit ', ' fanIn ', ' fanOut ', 'bug'].csv	[' dit ', ' fanIn ', ' fanOut ', 'bug']	4	0	0.0023741	30	0	74	0	linear
single-version-ck-oo.csv[' dit ', ' fanIn ', ' fanOut ', 'noai', 'bug'].csv	[' dit ', ' fanIn ', ' fanOut ', 'noai', 'bug']	5	0	0.0016641	38	0	116	0	sigmoid
single-version-ck-oo.csv[' dit ', ' fanIn ', ' fanOut ', 'noai', 'nomi', 'bug'].csv	[' dit ', ' fanIn ', ' fanOut ', 'noai', 'nomi', 'bug']	6	0	0.00141955	38	0	126	0	sigmoid
single-version-ck-oo.csv[' dit ', ' fanIn ', ' fanOut ', 'nomi', 'bug'].csv	[' dit ', ' fanIn ', ' fanOut ', 'nomi', 'bug']	5	0	0.00154468	37	0	123	0	linear
single-version-ck-oo.csv[' dit ', ' fanIn ', 'bug'].csv	[' dit ', ' fanIn ', 'bug']	3	0	0.00851909	11	0	18	0	rbf
single-version-ck-oo.csv[' dit ', ' fanIn ', 'noai', 'bug'].csv	[' dit ', ' fanIn ', 'noai', 'bug']	4	0	0.00251571	27	0	71	0	linear
single-version-ck-oo.csv[' dit ', ' fanIn ', 'noai', 'nomi', 'bug'].csv	[' dit ', ' fanIn ', 'noai', 'nomi', 'bug']	5	0	0.00199035	30	0	94	0	linear
single-version-ck-oo.csv[' dit ', ' fanIn ', 'nomi', 'bug'].csv	[' dit ', ' fanIn ', 'nomi', 'bug']	4	0	0.00234645	26	0	81	0	linear
single-version-ck-oo.csv[' dit ', ' fanOut ', 'bug'].csv	[' dit ', ' fanOut ', 'bug']	3	0	0.00684173	15	0	22	0	rbf
single-version-ck-oo.csv[' dit ', ' fanOut ', 'noai', 'bug'].csv	[' dit ', ' fanOut ', 'noai', 'bug']	4	0	0.00220657	32	0	81	0	sigmoid
single-version-ck-oo.csv[' dit ', ' fanOut ', 'noai', 'nomi', 'bug'].csv	[' dit ', ' fanOut ', 'noai', 'nomi', 'bug']	5	0	0.00200512	34	0	100	0	sigmoid
single-version-ck-oo.csv[' dit ', ' fanOut ', 'nomi', 'bug'].csv	[' dit ', ' fanOut ', 'nomi', 'bug']	4	0	0.00209782	31	0	93	0	rbf
single-version-ck-oo.csv[' dit ', ' noc ', ' fanIn ', ' fanOut ', 'bug'].csv	[' dit ', ' noc ', ' fanIn ', ' fanOut ', 'bug']	5	0	0.0021071	33	0	87	0	linear
single-version-ck-oo.csv[' dit ', ' noc ', ' fanIn ', ' fanOut ', 'noai', 'bug'].csv	[' dit ', ' noc ', ' fanIn ', ' fanOut ', 'noai', 'bug']	6	0	0.0015416	38	0	122	0	sigmoid
single-version-ck-oo.csv[' dit ', ' noc ', ' fanIn ', ' fanOut ', 'noai', 'nomi', 'bug'].csv	[' dit ', ' noc ', ' fanIn ', ' fanOut ', 'noai', 'nomi', 'bug']	7	0	0.00150725	39	0	130	0	sigmoid
single-version-ck-oo.csv[' dit ', ' noc ', ' fanIn ', ' fanOut ', 'nomi', 'bug'].csv	[' dit ', ' noc ', ' fanIn ', ' fanOut ', 'nomi', 'bug']	6	0	0.00150597	38	0	128	0	sigmoid
single-version-ck-oo.csv[' dit ', ' noc ', ' fanIn ', 'bug'].csv	[' dit ', ' noc ', ' fanIn ', 'bug']	4	0	0.00468144	17	0	36	0	linear
single-version-ck-oo.csv[' dit ', ' noc ', ' fanIn ', 'noai', 'bug'].csv	[' dit ', ' noc ', ' fanIn ', 'noai', 'bug']	5	0	0.00240445	29	0	83	0	sigmoid
single-version-ck-oo.csv[' dit ', ' noc ', ' fanIn ', 'noai', 'nomi', 'bug'].csv	[' dit ', ' noc ', ' fanIn ', 'noai', 'nomi', 'bug']	6	0	0.00195796	32	0	103	0	rbf
single-version-ck-oo.csv[' dit ', ' noc ', ' fanIn ', 'nomi', 'bug'].csv	[' dit ', ' noc ', ' fanIn ', 'nomi', 'bug']	5	0	0.002141	29	0	93	0	rbf
single-version-ck-oo.csv[' dit ', ' noc ', ' fanOut ', 'bug'].csv	[' dit ', ' noc ', ' fanOut ', 'bug']	4	0	0.00348926	23	0	45	0	rbf
single-version-ck-oo.csv[' dit ', ' noc ', ' fanOut ', 'noai', 'bug'].csv	[' dit ', ' noc ', ' fanOut ', 'noai', 'bug']	5	0	0.00197782	35	0	94	0	sigmoid
single-version-ck-oo.csv[' dit ', ' noc ', ' fanOut ', 'noai', 'nomi', 'bug'].csv	[' dit ', ' noc ', ' fanOut ', 'noai', 'nomi', 'bug']	6	0	0.00164288	36	0	110	0	sigmoid
single-version-ck-oo.csv[' dit ', ' noc ', ' fanOut ', 'nomi', 'bug'].csv	[' dit ', ' noc ', ' fanOut ', 'nomi', 'bug']	5	0	0.00180079	35	0	105	0	sigmoid
single-version-ck-oo.csv[' dit ', ' noc ', 'noai', 'bug'].csv	[' dit ', ' noc ', 'noai', 'bug']	4	0	0.0034019	20	0	50	0	rbf
single-version-ck-oo.csv[' dit ', ' noc ', 'noai', 'nomi', 'bug'].csv	[' dit ', ' noc ', 'noai', 'nomi', 'bug']	5	0	0.00251066	25	0	73	0	linear
single-version-ck-oo.csv[' dit ', ' noc ', 'nomi', 'bug'].csv	[' dit ', ' noc ', 'nomi', 'bug']	4	0	0.00340511	17	0	57	0	rbf
single-version-ck-oo.csv[' dit ', 'noai', 'bug'].csv	[' dit ', 'noai', 'bug']	3	0	0.0050435	15	0	31	0	rbf
single-version-ck-oo.csv[' dit ', 'noai', 'nomi', 'bug'].csv	[' dit ', 'noai', 'nomi', 'bug']	4	0	0.00326568	20	0	56	0	linear
single-version-ck-oo.csv[' dit ', 'nomi', 'bug'].csv	[' dit ', 'nomi', 'bug']	3	0.454545	0.0125974	11	0	37	0	poly
single-version-ck-oo.csv[' fanIn ', ' fanOut ', 'bug'].csv	[' fanIn ', ' fanOut ', 'bug']	3	0	0.00431708	23	0	34	0	sigmoid
single-version-ck-oo.csv[' fanIn ', ' fanOut ', 'noai', 'bug'].csv	[' fanIn ', ' fanOut ', 'noai', 'bug']	4	0	0.00190392	37	0	105	0	sigmoid
single-version-ck-oo.csv[' fanIn ', ' fanOut ', 'noai', 'nomi', 'bug'].csv	[' fanIn ', ' fanOut ', 'noai', 'nomi', 'bug']	5	0.00378947	0.00149658	38	0	125	0	rbf
single-version-ck-oo.csv[' fanIn ', ' fanOut ', 'nomi', 'bug'].csv	[' fanIn ', ' fanOut ', 'nomi', 'bug']	4	0	0.00158605	37	0	119	0	linear
single-version-ck-oo.csv[' fanIn ', 'noai', 'bug'].csv	[' fanIn ', 'noai', 'bug']	3	0	0.00337252	23	0	55	0	rbf
single-version-ck-oo.csv[' fanIn ', 'noai', 'nomi', 'bug'].csv	[' fanIn ', 'noai', 'nomi', 'bug']	4	0	0.0020554	30	0	92	0	sigmoid
single-version-ck-oo.csv[' fanIn ', 'nomi', 'bug'].csv	[' fanIn ', 'nomi', 'bug']	3	0	0.00280575	24	0	66	0	rbf
single-version-ck-oo.csv[' fanOut ', 'noai', 'bug'].csv	[' fanOut ', 'noai', 'bug']	3	0	0.0026744	30	0	68	0	sigmoid
single-version-ck-oo.csv[' fanOut ', 'noai', 'nomi', 'bug'].csv	[' fanOut ', 'noai', 'nomi', 'bug']	4	0	0.00185824	34	0	99	0	rbf
single-version-ck-oo.csv[' fanOut ', 'nomi', 'bug'].csv	[' fanOut ', 'nomi', 'bug']	3	0	0.00218573	30	0	83	0	linear
single-version-ck-oo.csv[' noc ', ' fanIn ', ' fanOut ', 'bug'].csv	[' noc ', ' fanIn ', ' fanOut ', 'bug']	4	0	0.00310502	28	0	54	0	sigmoid
single-version-ck-oo.csv[' noc ', ' fanIn ', ' fanOut ', 'noai', 'bug'].csv	[' noc ', ' fanIn ', ' fanOut ', 'noai', 'bug']	5	0	0.00171858	38	0	112	0	sigmoid
single-version-ck-oo.csv[' noc ', ' fanIn ', ' fanOut ', 'noai', 'nomi', 'bug'].csv	[' noc ', ' fanIn ', ' fanOut ', 'noai', 'nomi', 'bug']	6	0	0.00145378	38	0	130	0	linear
single-version-ck-oo.csv[' noc ', ' fanIn ', ' fanOut ', 'nomi', 'bug'].csv	[' noc ', ' fanIn ', ' fanOut ', 'nomi', 'bug']	5	0	0.00151758	38	0	125	0	linear
single-version-ck-oo.csv[' noc ', ' fanIn ', 'bug'].csv	[' noc ', ' fanIn ', 'bug']	3	0	0.00828675	9	0	18	0	sigmoid
single-version-ck-oo.csv[' noc ', ' fanIn ', 'noai', 'bug'].csv	[' noc ', ' fanIn ', 'noai', 'bug']	4	0	0.00325408	27	0	70	0	sigmoid
single-version-ck-oo.csv[' noc ', ' fanIn ', 'noai', 'nomi', 'bug'].csv	[' noc ', ' fanIn ', 'noai', 'nomi', 'bug']	5	0	0.00184296	32	0	101	0	sigmoid
single-version-ck-oo.csv[' noc ', ' fanIn ', 'nomi', 'bug'].csv	[' noc ', ' fanIn ', 'nomi', 'bug']	4	0.00045208	0.0023253	28	0	79	0	rbf
single-version-ck-oo.csv[' noc ', ' fanOut ', 'bug'].csv	[' noc ', ' fanOut ', 'bug']	3	0.045614	0.00710003	15	0	19	0	sigmoid
single-version-ck-oo.csv[' noc ', ' fanOut ', 'noai', 'bug'].csv	[' noc ', ' fanOut ', 'noai', 'bug']	4	0	0.00220302	33	0	84	0	sigmoid
single-version-ck-oo.csv[' noc ', ' fanOut ', 'noai', 'nomi', 'bug'].csv	[' noc ', ' fanOut ', 'noai', 'nomi', 'bug']	5	0	0.00170673	36	0	109	0	linear
single-version-ck-oo.csv[' noc ', ' fanOut ', 'nomi', 'bug'].csv	[' noc ', ' fanOut ', 'nomi', 'bug']	4	0	0.00184458	34	0	100	0	linear
single-version-ck-oo.csv[' noc ', 'noai', 'bug'].csv	[' noc ', 'noai', 'bug']	3	0	0.00479158	17	0	34	0	linear
single-version-ck-oo.csv[' noc ', 'noai', 'nomi', 'bug'].csv	[' noc ', 'noai', 'nomi', 'bug']	4	0	0.0028785	25	0	70	0	sigmoid
single-version-ck-oo.csv[' noc ', 'nomi', 'bug'].csv	[' noc ', 'nomi', 'bug']	3	0	0.00447439	14	0	43	0	rbf
single-version-ck-oo.csv['noai', 'bug'].csv	['noai', 'bug']	2	0	0.0089486	11	0	16	0	rbf
single-version-ck-oo.csv['noai', 'nomi', 'bug'].csv	['noai', 'nomi', 'bug']	3	0	0.00351251	20	0	52	0	rbf
single-version-ck-oo.csv['nomi', 'bug'].csv	['nomi', 'bug']	2	0	0.00789442	7	0	23	0	linear
tomcat.csv['dit', 'ic', 'mfa', 'bug'].csv	['dit', 'ic', 'mfa', 'bug']	4	0	0.00569224	5	0	40	0	linear
tomcat.csv['dit', 'mfa', 'bug'].csv	['dit', 'mfa', 'bug']	3	0	0.00567885	4	0	35	0	sigmoid
tomcat.csv['dit', 'noc', 'ic', 'mfa', 'bug'].csv	['dit', 'noc', 'ic', 'mfa', 'bug']	5	0.5	0.0159337	0	6	44	0	poly
tomcat.csv['dit', 'noc', 'mfa', 'bug'].csv	['dit', 'noc', 'mfa', 'bug']	4	0	0.0050428	5	0	39	0	linear
tomcat.csv['ic', 'mfa', 'bug'].csv	['ic', 'mfa', 'bug']	3	0	0.00595021	5	0	38	0	linear
tomcat.csv['mfa', 'bug'].csv	['mfa', 'bug']	2	0	0.00671547	4	0	30	0	linear
tomcat.csv['noc', 'ic', 'mfa', 'bug'].csv	['noc', 'ic', 'mfa', 'bug']	4	0	0.00531597	6	0	42	0	linear
tomcat.csv['noc', 'mfa', 'bug'].csv	['noc', 'mfa', 'bug']	3	0	0.00580384	5	0	35	0	linear
xalan-2.4.csv['dit', 'mfa', 'bug'].csv	['dit', 'mfa', 'bug']	3	0	0.00473347	11	0	40	0	linear
xalan-2.4.csv['dit', 'mfa', 'ic', 'bug'].csv	['dit', 'mfa', 'ic', 'bug']	4	0	0.0039436	12	0	47	0	rbf
xalan-2.4.csv['dit', 'noc', 'mfa', 'bug'].csv	['dit', 'noc', 'mfa', 'bug']	4	0	0.00451171	12	0	45	0	rbf
xalan-2.4.csv['dit', 'noc', 'mfa', 'ic', 'bug'].csv	['dit', 'noc', 'mfa', 'ic', 'bug']	5	0	0.00409775	13	0	51	0	rbf
xalan-2.4.csv['mfa', 'bug'].csv	['mfa', 'bug']	2	0.154286	0.00626112	10	0	35	0	sigmoid
xalan-2.4.csv['mfa', 'ic', 'bug'].csv	['mfa', 'ic', 'bug']	3	0	0.00441678	11	0	45	0	linear
xalan-2.4.csv['noc', 'mfa', 'bug'].csv	['noc', 'mfa', 'bug']	3	0	0.00466123	11	0	42	0	linear
xalan-2.4.csv['noc', 'mfa', 'ic', 'bug'].csv	['noc', 'mfa', 'ic', 'bug']	4	0	0.00396919	12	0	49	0	linear
